# Supplementary material
Source: Elsevier journal article supplement (https://univ-rennes.hal.science/hal-01381135v1/file/mmc6.zip)
Supplement: mmc6 [file mmc6.zip › 10-PF6.cif]

 
data_nz1366_sqd
 
_audit_creation_method            SHELXL-2013
_chemical_name_systematic
;
 ?
;
_chemical_name_common             ?
_chemical_melting_point           ?
_chemical_formula_moiety          ?
_chemical_formula_sum
 'C127.25 H118.50 Cl4.50 Cu3 F6 N4 O6 P7 Re2' 
_chemical_formula_weight          2853.09

loop_
 _atom_type_symbol
 _atom_type_description
 _atom_type_scat_dispersion_real
 _atom_type_scat_dispersion_imag
 _atom_type_scat_source
 'C'  'C'   0.0033   0.0016
 'International Tables Vol C Tables 4.2.6.8 and 6.1.1.4'
 'H'  'H'   0.0000   0.0000
 'International Tables Vol C Tables 4.2.6.8 and 6.1.1.4'
 'N'  'N'   0.0061   0.0033
 'International Tables Vol C Tables 4.2.6.8 and 6.1.1.4'
 'O'  'O'   0.0106   0.0060
 'International Tables Vol C Tables 4.2.6.8 and 6.1.1.4'
 'F'  'F'   0.0171   0.0103
 'International Tables Vol C Tables 4.2.6.8 and 6.1.1.4'
 'P'  'P'   0.1023   0.0942
 'International Tables Vol C Tables 4.2.6.8 and 6.1.1.4'
 'Cu'  'Cu'   0.3201   1.2651
 'International Tables Vol C Tables 4.2.6.8 and 6.1.1.4'
 'Re'  'Re'  -1.0185   7.2310
 'International Tables Vol C Tables 4.2.6.8 and 6.1.1.4'
 'Cl'  'Cl'   0.1484   0.1585
 'International Tables Vol C Tables 4.2.6.8 and 6.1.1.4'
 
_space_group_crystal_system       triclinic
_space_group_IT_number            2
_space_group_name_H-M_alt         'P -1'
_space_group_name_Hall            '-P 1'
 
_shelx_space_group_comment
;
The symmetry employed for this shelxl refinement is uniquely defined
by the following loop, which should always be used as a source of
symmetry information in preference to the above space-group names.
They are only intended as comments.
;
 
loop_
 _space_group_symop_operation_xyz
 'x, y, z'
 '-x, -y, -z'
 
_cell_length_a                    15.2538(4)
_cell_length_b                    17.7777(7)
_cell_length_c                    25.8862(9)
_cell_angle_alpha                 89.730(3)
_cell_angle_beta                  72.967(3)
_cell_angle_gamma                 82.322(3)
_cell_volume                      6647.3(4)
_cell_formula_units_Z             2
_cell_measurement_temperature     150(2)
_cell_measurement_reflns_used   17221
_cell_measurement_theta_min     2.4653
_cell_measurement_theta_max     28.0760
 
_exptl_crystal_description        plate 
_exptl_crystal_colour             yellow 
_exptl_crystal_density_meas       ? 
_exptl_crystal_density_method     ?              
_exptl_crystal_density_diffrn     1.425          
_exptl_crystal_F_000              2861
_exptl_transmission_factor_min    ?                                             
_exptl_transmission_factor_max    ?                                             
_exptl_crystal_size_max           0.350
_exptl_crystal_size_mid           0.130
_exptl_crystal_size_min           0.070
_exptl_absorpt_coefficient_mu     2.521
_shelx_estimated_absorpt_T_min    0.472
_shelx_estimated_absorpt_T_max    0.843
_exptl_absorpt_correction_T_min                   0.70341
_exptl_absorpt_correction_T_max                   1.00000
_exptl_absorpt_correction_type            'multi-scan'
_exptl_absorpt_process_details
;
CrysAlisPro, Agilent Technologies,
Version 1.171.35.21 (release 20-01-2012 CrysAlis171 .NET)
(compiled Jan 23 2012,18:06:46)
Empirical absorption correction using spherical harmonics,
 implemented in SCALE3 ABSPACK scaling algorithm.
;
 
_exptl_special_details
;
 ?
;
 
_diffrn_ambient_temperature       150(2)
_diffrn_radiation_wavelength      0.71073
_diffrn_radiation_type            MoK\a
_diffrn_radiation_source 'Enhance (Mo) X-ray Source'
_diffrn_radiation_monochromator 'graphite'
_diffrn_measurement_device_type 'Xcalibur, Eos'
_diffrn_measurement_details
;
#__ type_ start__ end____ width___ exp.time_
  1 omega   -5.00   85.00   1.0000   70.0000
omega____ theta____ kappa____ phi______ frames
    -       16.2357   57.0000   30.0000 90

#__ type_ start__ end____ width___ exp.time_
  2 omega   34.00   61.00   1.0000   70.0000
omega____ theta____ kappa____ phi______ frames
    -       16.2357  179.0000  -90.0000 27

#__ type_ start__ end____ width___ exp.time_
  3 omega  -52.00   26.00   1.0000   70.0000
omega____ theta____ kappa____ phi______ frames
    -       16.2357  -57.0000  120.0000 78

#__ type_ start__ end____ width___ exp.time_
  4 omega  -53.00   35.00   1.0000   70.0000
omega____ theta____ kappa____ phi______ frames
    -       16.2357  -57.0000 -120.0000 88

#__ type_ start__ end____ width___ exp.time_
  5 omega  -16.00   27.00   1.0000   70.0000
omega____ theta____ kappa____ phi______ frames
    -      -16.7826  -99.0000  -90.0000 43

#__ type_ start__ end____ width___ exp.time_
  6 omega  -22.00   22.00   1.0000   70.0000
omega____ theta____ kappa____ phi______ frames
    -      -16.7826  -99.0000  150.0000 44

#__ type_ start__ end____ width___ exp.time_
  7 omega  -17.00   21.00   1.0000   70.0000
omega____ theta____ kappa____ phi______ frames
    -      -16.7826  -99.0000   30.0000 38

#__ type_ start__ end____ width___ exp.time_
  8 omega  -15.00   87.00   1.0000   70.0000
omega____ theta____ kappa____ phi______ frames
    -       16.2357   77.0000 -180.0000 102

#__ type_ start__ end____ width___ exp.time_
  9 omega  -44.00   56.00   1.0000   70.0000
omega____ theta____ kappa____ phi______ frames
    -      -16.7826   37.0000  120.0000 100

#__ type_ start__ end____ width___ exp.time_
 10 omega  -48.00   54.00   1.0000   70.0000
omega____ theta____ kappa____ phi______ frames
    -      -16.7826   77.0000  -90.0000 102

#__ type_ start__ end____ width___ exp.time_
 11 omega  -25.00   18.00   1.0000   70.0000
omega____ theta____ kappa____ phi______ frames
    -      -16.7826  -99.0000 -120.0000 43

#__ type_ start__ end____ width___ exp.time_
 12 omega  -95.00  -34.00   1.0000   70.0000
omega____ theta____ kappa____ phi______ frames
    -      -16.7826 -179.0000  -90.0000 61

;
_diffrn_measurement_method '\w scans'
_diffrn_detector_area_resol_mean  16.1695 
_diffrn_reflns_number             102724
_diffrn_reflns_av_unetI/netI      0.0906
_diffrn_reflns_av_R_equivalents   0.0617
_diffrn_reflns_limit_h_min        -20
_diffrn_reflns_limit_h_max        19
_diffrn_reflns_limit_k_min        -23
_diffrn_reflns_limit_k_max        23
_diffrn_reflns_limit_l_min        -32
_diffrn_reflns_limit_l_max        33
_diffrn_reflns_theta_min          2.470
_diffrn_reflns_theta_max          28.137
_diffrn_reflns_theta_full         27.000
_diffrn_measured_fraction_theta_max   0.867
_diffrn_measured_fraction_theta_full  0.948
_diffrn_reflns_Laue_measured_fraction_max    0.867
_diffrn_reflns_Laue_measured_fraction_full   0.948
_diffrn_reflns_point_group_measured_fraction_max   0.867
_diffrn_reflns_point_group_measured_fraction_full  0.948
_reflns_number_total              28214
_reflns_number_gt                 16798
_reflns_threshold_expression      'I > 2\s(I)'
_reflns_Friedel_coverage          0.000
_reflns_Friedel_fraction_max      .
_reflns_Friedel_fraction_full     .
 
_reflns_special_details
;
 Reflections were merged by SHELXL according to the crystal
 class for the calculation of statistics and refinement.
 
 _reflns_Friedel_fraction is defined as the number of unique
 Friedel pairs measured divided by the number that would be
 possible theoretically, ignoring centric projections and
 systematic absences.
;
 
_computing_data_collection
;
CrysAlisPro, Agilent Technologies,
Version 1.171.35.21 (release 20-01-2012 CrysAlis171 .NET)
(compiled Jan 23 2012,18:06:46)
;
_computing_cell_refinement
;
CrysAlisPro, Agilent Technologies,
Version 1.171.35.21 (release 20-01-2012 CrysAlis171 .NET)
(compiled Jan 23 2012,18:06:46)
;
_computing_data_reduction
;
CrysAlisPro, Agilent Technologies,
Version 1.171.35.21 (release 20-01-2012 CrysAlis171 .NET)
(compiled Jan 23 2012,18:06:46)
;
_computing_structure_solution     'SHELXS-2013 (Sheldrick, 2013)'
_computing_structure_refinement   'SHELXL-2013 (Sheldrick, 2013)'
_computing_molecular_graphics     ?
_computing_publication_material   ?
 
_refine_special_details
;
 ?
;
_refine_ls_structure_factor_coef  Fsqd
_refine_ls_matrix_type            full
_refine_ls_weighting_scheme       calc
_refine_ls_weighting_details
'w=1/[\s^2^(Fo^2^)+(0.0862P)^2^] where P=(Fo^2^+2Fc^2^)/3'
_atom_sites_solution_primary      ?
_atom_sites_solution_secondary    ?
_atom_sites_solution_hydrogens    geom
_refine_ls_hydrogen_treatment     constr
_refine_ls_extinction_method      none
_refine_ls_extinction_coef        .
_refine_ls_number_reflns          28214
_refine_ls_number_parameters      1460
_refine_ls_number_restraints      21
_refine_ls_R_factor_all           0.1188
_refine_ls_R_factor_gt            0.0678
_refine_ls_wR_factor_ref          0.1856
_refine_ls_wR_factor_gt           0.1632
_refine_ls_goodness_of_fit_ref    1.067
_refine_ls_restrained_S_all       1.067
_refine_ls_shift/su_max           0.002
_refine_ls_shift/su_mean          0.000
 
loop_
 _atom_site_label
 _atom_site_type_symbol
 _atom_site_fract_x
 _atom_site_fract_y
 _atom_site_fract_z
 _atom_site_U_iso_or_equiv
 _atom_site_adp_type
 _atom_site_occupancy
 _atom_site_site_symmetry_order  
 _atom_site_calc_flag
 _atom_site_refinement_flags_posn
 _atom_site_refinement_flags_adp
 _atom_site_refinement_flags_occupancy
 _atom_site_disorder_assembly
 _atom_site_disorder_group
Re1 Re 0.81985(2) 0.86323(2) 0.37249(2) 0.05455(12) Uani 1 1 d . . . . .
Re2 Re 1.27192(2) 0.09120(2) 0.21669(2) 0.04922(11) Uani 1 1 d . . . . .
Cu3 Cu 1.17913(5) 0.52739(4) 0.27062(3) 0.03304(19) Uani 1 1 d . . . . .
Cu4 Cu 1.08431(5) 0.50277(4) 0.20521(3) 0.03120(18) Uani 1 1 d . . . . .
Cu5 Cu 1.03325(5) 0.44748(5) 0.29878(3) 0.0350(2) Uani 1 1 d . . . . .
C1 C 0.8871(5) 0.7548(4) 0.3457(3) 0.0486(18) Uani 1 1 d . . . . .
C2 C 0.9258(5) 0.6918(4) 0.3225(3) 0.0464(18) Uani 1 1 d . . . . .
C3 C 0.9723(5) 0.6222(4) 0.2997(3) 0.0432(17) Uani 1 1 d . . . . .
C4 C 1.0116(5) 0.5621(4) 0.2799(2) 0.0373(16) Uani 1 1 d . . . . .
C5 C 1.1786(4) 0.4256(4) 0.2351(2) 0.0337(15) Uani 1 1 d . . . . .
C6 C 1.2001(4) 0.3574(4) 0.2326(2) 0.0295(14) Uani 1 1 d . . . . .
P6 P 1.02751(13) 0.44607(11) 0.38632(6) 0.0384(4) Uani 1 1 d . . . . .
C7 C 1.2237(4) 0.2795(4) 0.2302(2) 0.0350(15) Uani 1 1 d . . . . .
P7 P 1.21005(12) 0.50814(11) 0.35189(6) 0.0386(4) Uani 1 1 d . . . . .
C8 C 1.2429(5) 0.2110(4) 0.2280(3) 0.0428(17) Uani 1 1 d . . . . .
P8 P 1.22276(12) 0.63616(10) 0.23168(7) 0.0354(4) Uani 1 1 d . . . . .
P9 P 1.12990(11) 0.59696(10) 0.14852(6) 0.0325(4) Uani 1 1 d . . . . .
P10 P 1.02168(12) 0.42027(11) 0.16425(6) 0.0369(4) Uani 1 1 d . . . . .
P11 P 0.94248(12) 0.36969(11) 0.27587(7) 0.0374(4) Uani 1 1 d . . . . .
N11 N 0.7364(4) 0.8436(3) 0.3198(2) 0.0472(15) Uani 1 1 d . . . . .
C12 C 0.6560(6) 0.8160(6) 0.3367(4) 0.077(3) Uani 1 1 d . . . . .
H12 H 0.6352 0.8016 0.3732 0.092 Uiso 1 1 calc R U . . .
C13 C 0.6024(7) 0.8076(6) 0.3036(4) 0.084(3) Uani 1 1 d . . . . .
H13 H 0.5458 0.7875 0.3176 0.101 Uiso 1 1 calc R U . . .
C14 C 0.6289(5) 0.8280(5) 0.2500(3) 0.062(2) Uani 1 1 d . . . . .
C15 C 0.7142(5) 0.8560(4) 0.2331(3) 0.0490(18) Uani 1 1 d . . . . .
H15 H 0.7359 0.8723 0.1972 0.059 Uiso 1 1 calc R U . . .
C16 C 0.7675(5) 0.8605(4) 0.2678(3) 0.0450(17) Uani 1 1 d . . . . .
C17 C 0.5737(6) 0.8229(7) 0.2106(4) 0.085(3) Uani 1 1 d . . . . .
C18 C 0.4884(8) 0.7827(11) 0.2346(5) 0.189(8) Uani 1 1 d . . . . .
H18A H 0.4534 0.7819 0.2084 0.283 Uiso 1 1 calc R U . . .
H18B H 0.4490 0.8101 0.2678 0.283 Uiso 1 1 calc R U . . .
H18C H 0.5084 0.7305 0.2429 0.283 Uiso 1 1 calc R U . . .
C19 C 0.5413(7) 0.9027(6) 0.1981(5) 0.112(4) Uani 1 1 d . . . . .
H19A H 0.5049 0.9012 0.1727 0.169 Uiso 1 1 calc R U . . .
H19B H 0.5950 0.9287 0.1819 0.169 Uiso 1 1 calc R U . . .
H19C H 0.5029 0.9300 0.2316 0.169 Uiso 1 1 calc R U . . .
C20 C 0.6338(6) 0.7778(5) 0.1596(4) 0.070(2) Uani 1 1 d . . . . .
H20A H 0.5982 0.7759 0.1338 0.105 Uiso 1 1 calc R U . . .
H20B H 0.6532 0.7261 0.1690 0.105 Uiso 1 1 calc R U . . .
H20C H 0.6886 0.8025 0.1433 0.105 Uiso 1 1 calc R U . . .
N21 N 0.8987(4) 0.8930(3) 0.2924(2) 0.0427(14) Uani 1 1 d . . . . .
C22 C 0.8609(5) 0.8841(4) 0.2511(3) 0.0372(16) Uani 1 1 d . . . . .
C23 C 0.9090(5) 0.8946(4) 0.1982(3) 0.0406(16) Uani 1 1 d . . . . .
H23 H 0.8800 0.8910 0.1707 0.049 Uiso 1 1 calc R U . . .
C24 C 1.0002(5) 0.9108(4) 0.1846(3) 0.0459(18) Uani 1 1 d . . . . .
C25 C 1.0354(5) 0.9178(4) 0.2282(3) 0.0476(18) Uani 1 1 d . . . . .
H25 H 1.0969 0.9290 0.2215 0.057 Uiso 1 1 calc R U . . .
C26 C 0.9846(5) 0.9092(5) 0.2791(3) 0.057(2) Uani 1 1 d . . . . .
H26 H 1.0117 0.9151 0.3072 0.068 Uiso 1 1 calc R U . . .
C27 C 1.0546(5) 0.9191(5) 0.1248(3) 0.053(2) Uani 1 1 d . . . . .
C28 C 1.0093(6) 0.9920(5) 0.1062(4) 0.069(2) Uani 1 1 d . . . . .
H28A H 1.0138 1.0354 0.1281 0.103 Uiso 1 1 calc R U . . .
H28B H 0.9440 0.9883 0.1106 0.103 Uiso 1 1 calc R U . . .
H28C H 1.0411 0.9991 0.0681 0.103 Uiso 1 1 calc R U . . .
C29 C 1.0493(6) 0.8531(5) 0.0913(3) 0.075(3) Uani 1 1 d . . . . .
H29A H 1.0835 0.8595 0.0534 0.113 Uiso 1 1 calc R U . . .
H29B H 0.9844 0.8499 0.0942 0.113 Uiso 1 1 calc R U . . .
H29C H 1.0766 0.8063 0.1041 0.113 Uiso 1 1 calc R U . . .
C30 C 1.1573(5) 0.9265(5) 0.1179(3) 0.070(3) Uani 1 1 d . . . . .
H30A H 1.1607 0.9699 0.1401 0.105 Uiso 1 1 calc R U . . .
H30B H 1.1888 0.9342 0.0799 0.105 Uiso 1 1 calc R U . . .
H30C H 1.1873 0.8800 0.1296 0.105 Uiso 1 1 calc R U . . .
C31 C 0.7525(6) 0.9656(5) 0.3902(3) 0.063(2) Uani 1 1 d . . . . .
O32 O 0.7104(5) 1.0245(4) 0.4023(3) 0.099(2) Uani 1 1 d . . . . .
C33 C 0.7451(7) 0.8258(5) 0.4371(3) 0.078(3) Uani 1 1 d . . . . .
O34 O 0.6992(5) 0.8007(4) 0.4750(3) 0.109(3) Uani 1 1 d . . . . .
C35 C 0.9020(7) 0.8874(5) 0.4110(3) 0.068(3) Uani 1 1 d . . . . .
O36 O 0.9510(6) 0.9065(4) 0.4329(3) 0.102(2) Uani 1 1 d . . . . .
N41 N 1.4066(4) 0.1000(3) 0.2262(2) 0.0476(15) Uani 1 1 d . . . . .
C42 C 1.4758(6) 0.1140(4) 0.1825(3) 0.0486(19) Uani 1 1 d . . . . .
C43 C 1.5637(5) 0.1247(4) 0.1846(3) 0.0499(19) Uani 1 1 d . . . . .
H43 H 1.6098 0.1346 0.1525 0.060 Uiso 1 1 calc R U . . .
C44 C 1.5834(5) 0.1208(4) 0.2331(3) 0.0499(19) Uani 1 1 d . . . . .
C45 C 1.5134(6) 0.1039(5) 0.2774(3) 0.061(2) Uani 1 1 d . . . . .
H45 H 1.5254 0.0977 0.3113 0.073 Uiso 1 1 calc R U . . .
C46 C 1.4265(6) 0.0957(4) 0.2740(3) 0.058(2) Uani 1 1 d . . . . .
H46 H 1.3795 0.0867 0.3059 0.070 Uiso 1 1 calc R U . . .
C47 C 1.6786(6) 0.1327(5) 0.2385(3) 0.063(2) Uani 1 1 d . . . . .
C48 C 1.6661(8) 0.1913(7) 0.2840(5) 0.117(4) Uani 1 1 d . . . . .
H48A H 1.6372 0.2402 0.2751 0.175 Uiso 1 1 calc R U . . .
H48B H 1.7266 0.1970 0.2883 0.175 Uiso 1 1 calc R U . . .
H48C H 1.6264 0.1743 0.3178 0.175 Uiso 1 1 calc R U . . .
C49 C 1.7386(9) 0.1672(9) 0.1897(5) 0.145(6) Uani 1 1 d . . . . .
H49A H 1.7055 0.2154 0.1826 0.217 Uiso 1 1 calc R U . . .
H49B H 1.7529 0.1323 0.1582 0.217 Uiso 1 1 calc R U . . .
H49C H 1.7962 0.1763 0.1966 0.217 Uiso 1 1 calc R U . . .
C50 C 1.7228(9) 0.0619(7) 0.2525(8) 0.183(8) Uani 1 1 d . . . . .
H50A H 1.6811 0.0426 0.2847 0.274 Uiso 1 1 calc R U . . .
H50B H 1.7801 0.0703 0.2601 0.274 Uiso 1 1 calc R U . . .
H50C H 1.7373 0.0248 0.2223 0.274 Uiso 1 1 calc R U . . .
N51 N 1.3580(4) 0.1137(3) 0.1373(2) 0.0427(14) Uani 1 1 d . . . . .
C52 C 1.4479(5) 0.1192(4) 0.1316(3) 0.0459(18) Uani 1 1 d . . . . .
C53 C 1.5089(5) 0.1280(4) 0.0821(3) 0.0517(19) Uani 1 1 d . . . . .
H53 H 1.5719 0.1303 0.0793 0.062 Uiso 1 1 calc R U . . .
C54 C 1.4798(6) 0.1336(4) 0.0352(3) 0.057(2) Uani 1 1 d . . . . .
C55 C 1.3849(6) 0.1283(4) 0.0431(3) 0.060(2) Uani 1 1 d . . . . .
H55 H 1.3606 0.1315 0.0132 0.072 Uiso 1 1 calc R U . . .
C56 C 1.3301(6) 0.1189(4) 0.0924(3) 0.052(2) Uani 1 1 d . . . . .
H56 H 1.2669 0.1156 0.0962 0.063 Uiso 1 1 calc R U . . .
C57 C 1.5447(6) 0.1415(5) -0.0198(3) 0.065(2) Uani 1 1 d . . . . .
C58 C 1.6254(9) 0.1814(6) -0.0167(4) 0.115(4) Uani 1 1 d . . . . .
H58A H 1.6586 0.1527 0.0059 0.173 Uiso 1 1 calc R U . . .
H58B H 1.6020 0.2328 -0.0009 0.173 Uiso 1 1 calc R U . . .
H58C H 1.6677 0.1844 -0.0531 0.173 Uiso 1 1 calc R U . . .
C59 C 1.5835(7) 0.0633(6) -0.0451(4) 0.093(3) Uani 1 1 d . . . . .
H59A H 1.6162 0.0345 -0.0224 0.140 Uiso 1 1 calc R U . . .
H59B H 1.6267 0.0677 -0.0811 0.140 Uiso 1 1 calc R U . . .
H59C H 1.5329 0.0369 -0.0484 0.140 Uiso 1 1 calc R U . . .
C60 C 1.4953(9) 0.1841(11) -0.0563(5) 0.216(11) Uani 1 1 d . . . . .
H60A H 1.5398 0.1894 -0.0917 0.325 Uiso 1 1 calc R U . . .
H60B H 1.4674 0.2346 -0.0400 0.325 Uiso 1 1 calc R U . . .
H60C H 1.4468 0.1560 -0.0607 0.325 Uiso 1 1 calc R U . . .
C61 C 1.3014(5) -0.0181(5) 0.1976(3) 0.058(2) Uani 1 1 d . . . . .
O62 O 1.3163(4) -0.0815(3) 0.1861(3) 0.0712(17) Uani 1 1 d . . . . .
C63 C 1.2089(6) 0.0679(4) 0.2901(4) 0.059(2) Uani 1 1 d . . . . .
O64 O 1.1760(5) 0.0521(4) 0.3334(3) 0.085(2) Uani 1 1 d . . . . .
C65 C 1.1568(7) 0.0949(4) 0.2005(3) 0.064(2) Uani 1 1 d . . . . .
O66 O 1.0874(5) 0.1031(3) 0.1912(3) 0.0817(19) Uani 1 1 d . . . . .
C67 C 1.0994(5) 0.5113(4) 0.4049(2) 0.0434(17) Uani 1 1 d . . . . .
H67A H 1.0661 0.5638 0.4099 0.052 Uiso 1 1 calc R U . . .
H67B H 1.1108 0.4963 0.4395 0.052 Uiso 1 1 calc R U . . .
C68 C 1.1558(4) 0.6740(4) 0.1866(2) 0.0365(15) Uani 1 1 d . . . . .
H68A H 1.1914 0.7083 0.1609 0.044 Uiso 1 1 calc R U . . .
H68B H 1.0972 0.7041 0.2082 0.044 Uiso 1 1 calc R U . . .
C69 C 0.9955(5) 0.3369(4) 0.2055(2) 0.0412(17) Uani 1 1 d . . . . .
H69A H 0.9525 0.3097 0.1930 0.049 Uiso 1 1 calc R U . . .
H69B H 1.0531 0.3016 0.2020 0.049 Uiso 1 1 calc R U . . .
C70 C 1.2707(5) 0.5723(4) 0.3790(3) 0.0501(19) Uani 1 1 d . . . . .
C71 C 1.2254(7) 0.6370(5) 0.4117(3) 0.071(2) Uani 1 1 d . . . . .
H71 H 1.1596 0.6459 0.4229 0.086 Uiso 1 1 calc R U . . .
C72 C 1.2724(8) 0.6871(6) 0.4279(4) 0.088(3) Uani 1 1 d . . . . .
H72 H 1.2389 0.7303 0.4498 0.106 Uiso 1 1 calc R U . . .
C73 C 1.3664(9) 0.6769(7) 0.4133(4) 0.102(4) Uani 1 1 d . . . . .
H73 H 1.3984 0.7135 0.4240 0.122 Uiso 1 1 calc R U . . .
C74 C 1.4149(8) 0.6129(8) 0.3830(6) 0.131(5) Uani 1 1 d . . . . .
H74 H 1.4806 0.6042 0.3738 0.157 Uiso 1 1 calc R U . . .
C75 C 1.3658(7) 0.5593(7) 0.3654(4) 0.101(4) Uani 1 1 d . . . . .
H75 H 1.3989 0.5152 0.3444 0.121 Uiso 1 1 calc R U . . .
C76 C 1.2758(5) 0.4165(4) 0.3581(3) 0.0422(17) Uani 1 1 d . . . . .
C77 C 1.3335(5) 0.3769(5) 0.3120(3) 0.061(2) Uani 1 1 d . . . . .
H77 H 1.3367 0.3978 0.2778 0.073 Uiso 1 1 calc R U . . .
C78 C 1.3862(7) 0.3088(6) 0.3141(4) 0.087(3) Uani 1 1 d . . . . .
H78 H 1.4261 0.2831 0.2819 0.104 Uiso 1 1 calc R U . . .
C79 C 1.3797(8) 0.2783(5) 0.3641(4) 0.089(3) Uani 1 1 d . . . . .
H79 H 1.4141 0.2304 0.3664 0.106 Uiso 1 1 calc R U . . .
C80 C 1.3222(7) 0.3181(6) 0.4117(4) 0.090(3) Uani 1 1 d . . . . .
H80 H 1.3184 0.2976 0.4461 0.108 Uiso 1 1 calc R U . . .
C81 C 1.2722(6) 0.3863(5) 0.4077(3) 0.061(2) Uani 1 1 d . . . . .
H81 H 1.2342 0.4134 0.4397 0.073 Uiso 1 1 calc R U . . .
C82 C 1.0564(5) 0.3584(4) 0.4177(3) 0.0475(18) Uani 1 1 d . . . . .
C83 C 1.0456(5) 0.3536(5) 0.4729(3) 0.053(2) Uani 1 1 d . . . . .
H83 H 1.0216 0.3977 0.4958 0.063 Uiso 1 1 calc R U . . .
C84 C 1.0690(7) 0.2865(5) 0.4943(3) 0.074(3) Uani 1 1 d . . . . .
H84 H 1.0628 0.2844 0.5319 0.088 Uiso 1 1 calc R U . . .
C85 C 1.1013(9) 0.2226(6) 0.4620(4) 0.105(4) Uani 1 1 d . . . . .
H85 H 1.1167 0.1757 0.4772 0.126 Uiso 1 1 calc R U . . .
C86 C 1.1118(9) 0.2257(6) 0.4069(4) 0.106(4) Uani 1 1 d . . . . .
H86 H 1.1337 0.1810 0.3844 0.127 Uiso 1 1 calc R U . . .
C87 C 1.0903(7) 0.2931(5) 0.3855(3) 0.074(3) Uani 1 1 d . . . . .
H87 H 1.0989 0.2953 0.3477 0.089 Uiso 1 1 calc R U . . .
C88 C 0.9101(5) 0.4837(5) 0.4258(2) 0.0482(19) Uani 1 1 d . . . . .
C89 C 0.8767(5) 0.5595(5) 0.4224(3) 0.056(2) Uani 1 1 d . . . . .
H89 H 0.9186 0.5931 0.4048 0.067 Uiso 1 1 calc R U . . .
C90 C 0.7848(6) 0.5870(6) 0.4437(3) 0.066(2) Uani 1 1 d . . . . .
H90 H 0.7638 0.6395 0.4419 0.079 Uiso 1 1 calc R U . . .
C91 C 0.7231(7) 0.5385(7) 0.4677(4) 0.081(3) Uani 1 1 d . . . . .
H91 H 0.6590 0.5571 0.4812 0.097 Uiso 1 1 calc R U . . .
C92 C 0.7534(7) 0.4630(7) 0.4723(3) 0.079(3) Uani 1 1 d . . . . .
H92 H 0.7105 0.4301 0.4899 0.095 Uiso 1 1 calc R U . . .
C93 C 0.8472(6) 0.4348(5) 0.4511(3) 0.062(2) Uani 1 1 d . . . . .
H93 H 0.8682 0.3826 0.4539 0.075 Uiso 1 1 calc R U . . .
C94 C 1.2050(5) 0.7198(4) 0.2768(3) 0.0434(17) Uani 1 1 d . . . . .
C95 C 1.1376(6) 0.7235(5) 0.3243(3) 0.060(2) Uani 1 1 d . . . . .
H95 H 1.1029 0.6822 0.3333 0.073 Uiso 1 1 calc R U . . .
C96 C 1.1169(7) 0.7858(6) 0.3607(3) 0.075(3) Uani 1 1 d . . . . .
H96 H 1.0689 0.7877 0.3939 0.090 Uiso 1 1 calc R U . . .
C97 C 1.1692(7) 0.8440(5) 0.3463(4) 0.074(3) Uani 1 1 d . . . . .
H97 H 1.1591 0.8859 0.3710 0.089 Uiso 1 1 calc R U . . .
C98 C 1.2346(7) 0.8434(5) 0.2981(4) 0.078(3) Uani 1 1 d . . . . .
H98 H 1.2675 0.8855 0.2881 0.094 Uiso 1 1 calc R U . . .
C99 C 1.2532(6) 0.7800(5) 0.2631(3) 0.064(2) Uani 1 1 d . . . . .
H99 H 1.2999 0.7786 0.2293 0.077 Uiso 1 1 calc R U . . .
C100 C 1.3435(5) 0.6256(4) 0.1909(3) 0.0504(19) Uani 1 1 d . . . . .
C101 C 1.4025(7) 0.5793(7) 0.2061(5) 0.117(5) Uani 1 1 d . . . . .
H101 H 1.3809 0.5521 0.2380 0.141 Uiso 1 1 calc R U . . .
C102 C 1.4977(7) 0.5669(9) 0.1779(7) 0.167(8) Uani 1 1 d . . . . .
H102 H 1.5411 0.5394 0.1933 0.201 Uiso 1 1 calc R U . . .
C103 C 1.5248(8) 0.5950(8) 0.1290(7) 0.139(6) Uani 1 1 d . . . . .
H103 H 1.5870 0.5818 0.1071 0.167 Uiso 1 1 calc R U . . .
C104 C 1.4671(8) 0.6404(7) 0.1106(4) 0.091(3) Uani 1 1 d . . . . .
H104 H 1.4881 0.6631 0.0767 0.109 Uiso 1 1 calc R U . . .
C105 C 1.3762(6) 0.6549(6) 0.1406(3) 0.072(3) Uani 1 1 d . . . . .
H105 H 1.3341 0.6863 0.1263 0.086 Uiso 1 1 calc R U . . .
C106 C 1.2300(4) 0.5801(4) 0.0883(2) 0.0391(16) Uani 1 1 d . . . . .
C107 C 1.2533(5) 0.6362(4) 0.0500(2) 0.0431(17) Uani 1 1 d . . . . .
H107 H 1.2173 0.6849 0.0553 0.052 Uiso 1 1 calc R U . . .
C108 C 1.3280(5) 0.6203(5) 0.0050(3) 0.053(2) Uani 1 1 d . . . . .
H108 H 1.3427 0.6584 -0.0207 0.064 Uiso 1 1 calc R U . . .
C109 C 1.3817(5) 0.5513(5) -0.0038(3) 0.057(2) Uani 1 1 d . . . . .
H109 H 1.4344 0.5420 -0.0347 0.068 Uiso 1 1 calc R U . . .
C110 C 1.3588(5) 0.4952(5) 0.0325(3) 0.059(2) Uani 1 1 d . . . . .
H110 H 1.3946 0.4463 0.0260 0.071 Uiso 1 1 calc R U . . .
C111 C 1.2821(4) 0.5097(4) 0.0796(3) 0.0430(17) Uani 1 1 d . . . . .
H111 H 1.2669 0.4710 0.1049 0.052 Uiso 1 1 calc R U . . .
C112 C 1.0372(4) 0.6448(4) 0.1243(2) 0.0355(15) Uani 1 1 d . . . . .
C113 C 1.0390(5) 0.6409(4) 0.0694(3) 0.0451(18) Uani 1 1 d . . . . .
H113 H 1.0909 0.6136 0.0434 0.054 Uiso 1 1 calc R U . . .
C114 C 0.9652(5) 0.6767(5) 0.0533(3) 0.055(2) Uani 1 1 d . . . . .
H114 H 0.9680 0.6761 0.0162 0.066 Uiso 1 1 calc R U . . .
C115 C 0.8867(5) 0.7137(5) 0.0918(3) 0.059(2) Uani 1 1 d . . . . .
H115 H 0.8360 0.7375 0.0807 0.071 Uiso 1 1 calc R U . . .
C116 C 0.8823(5) 0.7159(4) 0.1451(3) 0.053(2) Uani 1 1 d . . . . .
H116 H 0.8279 0.7395 0.1712 0.063 Uiso 1 1 calc R U . . .
C117 C 0.9593(5) 0.6829(4) 0.1614(3) 0.0420(17) Uani 1 1 d . . . . .
H117 H 0.9575 0.6869 0.1983 0.050 Uiso 1 1 calc R U . . .
C118 C 0.9149(5) 0.4474(5) 0.1459(3) 0.0510(19) Uani 1 1 d . . . . .
C119 C 0.8600(6) 0.5144(5) 0.1643(4) 0.066(2) Uani 1 1 d . . . . .
H119 H 0.8768 0.5479 0.1871 0.079 Uiso 1 1 calc R U . . .
C120 C 0.7769(6) 0.5343(6) 0.1494(4) 0.080(3) Uani 1 1 d . . . . .
H120 H 0.7399 0.5822 0.1601 0.096 Uiso 1 1 calc R U . . .
C121 C 0.7522(7) 0.4827(6) 0.1195(4) 0.079(3) Uani 1 1 d . . . . .
H121 H 0.6951 0.4941 0.1115 0.095 Uiso 1 1 calc R U . . .
C122 C 0.8047(7) 0.4172(7) 0.1011(4) 0.083(3) Uani 1 1 d . . . . .
H122 H 0.7864 0.3842 0.0787 0.099 Uiso 1 1 calc R U . . .
C123 C 0.8853(6) 0.3969(5) 0.1143(3) 0.063(2) Uani 1 1 d . . . . .
H123 H 0.9213 0.3489 0.1022 0.076 Uiso 1 1 calc R U . . .
C124 C 1.1033(5) 0.3843(5) 0.0992(3) 0.0484(19) Uani 1 1 d . . . . .
C125 C 1.1013(6) 0.4297(5) 0.0542(3) 0.060(2) Uani 1 1 d . . . . .
H125 H 1.0561 0.4732 0.0579 0.073 Uiso 1 1 calc R U . . .
C126 C 1.1670(7) 0.4090(6) 0.0045(3) 0.072(3) Uani 1 1 d . . . . .
H126 H 1.1658 0.4372 -0.0266 0.086 Uiso 1 1 calc R U . . .
C127 C 1.2322(6) 0.3489(6) 0.0012(3) 0.070(3) Uani 1 1 d . . . . .
H127 H 1.2785 0.3368 -0.0323 0.083 Uiso 1 1 calc R U . . .
C128 C 1.2346(7) 0.3050(7) 0.0434(4) 0.099(4) Uani 1 1 d . . . . .
H128 H 1.2789 0.2607 0.0389 0.119 Uiso 1 1 calc R U . . .
C129 C 1.1704(6) 0.3256(5) 0.0943(3) 0.062(2) Uani 1 1 d . . . . .
H129 H 1.1748 0.2980 0.1252 0.074 Uiso 1 1 calc R U . . .
C130 C 0.9170(5) 0.2824(5) 0.3111(3) 0.0495(19) Uani 1 1 d . . . . .
C131 C 0.9741(8) 0.2151(6) 0.2953(5) 0.108(4) Uani 1 1 d . . . . .
H131 H 1.0266 0.2132 0.2643 0.129 Uiso 1 1 calc R U . . .
C132 C 0.9565(10) 0.1483(7) 0.3243(6) 0.134(5) Uani 1 1 d . . . . .
H132 H 0.9971 0.1022 0.3130 0.160 Uiso 1 1 calc R U . . .
C133 C 0.8829(9) 0.1505(8) 0.3672(5) 0.110(4) Uani 1 1 d . . . . .
H133 H 0.8686 0.1051 0.3853 0.132 Uiso 1 1 calc R U . . .
C134 C 0.8265(8) 0.2187(7) 0.3861(4) 0.101(4) Uani 1 1 d . . . . .
H134 H 0.7770 0.2208 0.4187 0.122 Uiso 1 1 calc R U . . .
C135 C 0.8429(6) 0.2845(6) 0.3568(3) 0.079(3) Uani 1 1 d . . . . .
H135 H 0.8026 0.3307 0.3686 0.095 Uiso 1 1 calc R U . . .
C136 C 0.8262(5) 0.4155(5) 0.2793(3) 0.0477(18) Uani 1 1 d . . . . .
C137 C 0.7681(5) 0.3829(5) 0.2568(3) 0.057(2) Uani 1 1 d . . . . .
H137 H 0.7890 0.3348 0.2383 0.069 Uiso 1 1 calc R U . . .
C138 C 0.6802(6) 0.4186(6) 0.2606(4) 0.073(3) Uani 1 1 d . . . . .
H138 H 0.6418 0.3952 0.2444 0.088 Uiso 1 1 calc R U . . .
C139 C 0.6486(6) 0.4862(7) 0.2872(4) 0.091(3) Uani 1 1 d . . . . .
H139 H 0.5877 0.5100 0.2901 0.109 Uiso 1 1 calc R U . . .
C140 C 0.7068(7) 0.5226(6) 0.3114(4) 0.095(3) Uani 1 1 d . . . . .
H140 H 0.6854 0.5705 0.3301 0.114 Uiso 1 1 calc R U . . .
C141 C 0.7946(5) 0.4857(5) 0.3063(3) 0.063(2) Uani 1 1 d . . . . .
H141 H 0.8342 0.5088 0.3217 0.076 Uiso 1 1 calc R U . . .
P150 P 1.23092(18) 0.04589(16) -0.05319(10) 0.0728(7) Uani 1 1 d . . . . .
F151 F 1.3363(5) 0.0260(5) -0.0748(3) 0.133(3) Uani 1 1 d . . . . .
F152 F 1.2256(4) 0.0621(4) -0.1125(2) 0.108(2) Uani 1 1 d . . . . .
F153 F 1.2206(10) -0.0360(5) -0.0601(4) 0.227(6) Uani 1 1 d . . . . .
F154 F 1.1256(4) 0.0648(8) -0.0318(3) 0.222(6) Uani 1 1 d . . . . .
F155 F 1.2354(4) 0.0356(4) 0.0075(2) 0.107(2) Uani 1 1 d . . . . .
F156 F 1.2506(6) 0.1294(4) -0.0482(3) 0.140(3) Uani 1 1 d . . . . .
C160 C 1.4283(7) 0.3552(8) 0.1568(4) 0.111(4) Uani 1 1 d D . . . .
H16A H 1.3915 0.3260 0.1860 0.133 Uiso 1 1 calc R U . . .
H16B H 1.4006 0.4092 0.1626 0.133 Uiso 1 1 calc R U . . .
Cl14 Cl 1.4245(2) 0.32339(15) 0.09740(11) 0.1093(10) Uani 1 1 d D . . . .
Cl15 Cl 1.5422(3) 0.3461(3) 0.15940(19) 0.178(2) Uani 1 1 d D . . . .
C161 C 0.9329(10) 0.1632(7) 0.0516(5) 0.084(4) Uani 0.75 1 d . . P . .
H16C H 0.9744 0.1516 0.0144 0.100 Uiso 0.75 1 calc R U P . .
H16D H 0.9118 0.1151 0.0665 0.100 Uiso 0.75 1 calc R U P . .
Cl16 Cl 0.9964(4) 0.19701(19) 0.09119(18) 0.1244(17) Uani 0.75 1 d . . P . .
Cl17 Cl 0.8387(3) 0.22532(18) 0.04875(12) 0.0814(9) Uani 0.75 1 d . . P . .
C162 C 0.5704(14) 0.3575(13) 0.4038(8) 0.164(15) Uani 0.5 1 d D U P . .
H16E H 0.6364 0.3572 0.3833 0.197 Uiso 0.5 1 calc R U P . .
H16F H 0.5351 0.3519 0.3778 0.197 Uiso 0.5 1 calc R U P . .
Cl18 Cl 0.5312(7) 0.4347(11) 0.4390(5) 0.297(10) Uani 0.5 1 d D U P . .
Cl19 Cl 0.5582(8) 0.2853(11) 0.4481(5) 0.283(9) Uani 0.5 1 d D U P . .
 
loop_
 _atom_site_aniso_label
 _atom_site_aniso_U_11
 _atom_site_aniso_U_22
 _atom_site_aniso_U_33
 _atom_site_aniso_U_23
 _atom_site_aniso_U_13
 _atom_site_aniso_U_12
Re1 0.0690(2) 0.0435(2) 0.04232(18) -0.00113(14) -0.00974(16) 0.00814(16)
Re2 0.0600(2) 0.03203(18) 0.0593(2) 0.00082(14) -0.02568(16) -0.00116(14)
Cu3 0.0399(5) 0.0340(5) 0.0277(4) -0.0010(3) -0.0133(3) -0.0061(4)
Cu4 0.0367(4) 0.0338(4) 0.0245(4) 0.0016(3) -0.0107(3) -0.0063(3)
Cu5 0.0432(5) 0.0406(5) 0.0226(4) -0.0004(3) -0.0097(3) -0.0104(4)
C1 0.064(5) 0.041(4) 0.043(4) 0.006(3) -0.020(4) -0.002(4)
C2 0.050(5) 0.052(5) 0.036(4) 0.011(3) -0.010(3) -0.008(4)
C3 0.049(4) 0.049(5) 0.028(3) 0.002(3) -0.007(3) -0.001(4)
C4 0.037(4) 0.047(4) 0.028(3) 0.000(3) -0.010(3) -0.007(3)
C5 0.036(4) 0.035(4) 0.029(3) -0.004(3) -0.009(3) -0.003(3)
C6 0.032(3) 0.034(4) 0.023(3) 0.000(3) -0.008(3) -0.003(3)
P6 0.0501(11) 0.0455(11) 0.0200(8) -0.0020(7) -0.0091(8) -0.0106(9)
C7 0.036(4) 0.041(4) 0.026(3) -0.003(3) -0.007(3) -0.006(3)
P7 0.0437(11) 0.0449(11) 0.0283(9) -0.0038(8) -0.0126(8) -0.0057(8)
C8 0.055(5) 0.030(4) 0.044(4) 0.001(3) -0.016(3) -0.004(3)
P8 0.0367(10) 0.0344(10) 0.0377(9) 0.0000(7) -0.0140(8) -0.0078(8)
P9 0.0360(9) 0.0334(10) 0.0282(8) 0.0009(7) -0.0095(7) -0.0055(7)
P10 0.0378(10) 0.0479(11) 0.0280(8) -0.0004(8) -0.0119(7) -0.0114(8)
P11 0.0385(10) 0.0434(11) 0.0312(9) 0.0007(8) -0.0089(8) -0.0112(8)
N11 0.038(3) 0.046(4) 0.041(3) 0.007(3) 0.010(3) 0.002(3)
C12 0.061(6) 0.084(7) 0.066(6) 0.005(5) 0.012(5) -0.011(5)
C13 0.062(6) 0.116(9) 0.063(6) -0.003(6) 0.009(5) -0.037(6)
C14 0.027(4) 0.087(7) 0.067(6) -0.009(5) -0.003(4) -0.014(4)
C15 0.043(4) 0.042(5) 0.055(5) 0.002(4) -0.008(4) 0.001(3)
C16 0.038(4) 0.037(4) 0.051(4) 0.007(3) -0.003(3) 0.000(3)
C17 0.033(5) 0.129(10) 0.089(7) -0.006(7) -0.011(5) -0.020(5)
C18 0.080(9) 0.37(3) 0.137(12) -0.024(13) -0.015(8) -0.128(13)
C19 0.086(8) 0.111(9) 0.146(10) -0.049(8) -0.068(8) 0.042(7)
C20 0.063(6) 0.071(6) 0.087(6) -0.006(5) -0.040(5) -0.005(5)
N21 0.047(4) 0.032(3) 0.048(3) -0.003(3) -0.016(3) 0.004(3)
C22 0.041(4) 0.025(4) 0.041(4) -0.001(3) -0.008(3) 0.003(3)
C23 0.039(4) 0.042(4) 0.045(4) 0.001(3) -0.019(3) -0.005(3)
C24 0.041(4) 0.039(4) 0.053(4) 0.004(3) -0.005(3) -0.009(3)
C25 0.044(4) 0.054(5) 0.053(5) 0.009(4) -0.022(4) -0.019(4)
C26 0.048(5) 0.070(6) 0.060(5) 0.002(4) -0.025(4) -0.010(4)
C27 0.055(5) 0.057(5) 0.055(5) 0.009(4) -0.024(4) -0.021(4)
C28 0.055(5) 0.082(7) 0.078(6) 0.031(5) -0.031(5) -0.022(5)
C29 0.077(6) 0.087(7) 0.051(5) -0.003(5) 0.008(4) -0.032(5)
C30 0.041(5) 0.092(7) 0.076(6) 0.020(5) -0.014(4) -0.017(5)
C31 0.078(6) 0.048(5) 0.050(5) 0.005(4) -0.001(4) -0.005(5)
O32 0.109(6) 0.055(4) 0.109(5) -0.002(4) -0.013(4) 0.026(4)
C33 0.087(7) 0.075(7) 0.048(5) 0.014(5) 0.002(5) 0.020(5)
O34 0.131(6) 0.111(6) 0.054(4) 0.022(4) 0.009(4) 0.005(5)
C35 0.100(7) 0.056(6) 0.048(5) -0.009(4) -0.030(5) 0.010(5)
O36 0.139(7) 0.104(6) 0.066(4) -0.029(4) -0.054(4) 0.022(5)
N41 0.061(4) 0.031(3) 0.051(4) 0.002(3) -0.021(3) 0.000(3)
C42 0.066(5) 0.027(4) 0.054(5) -0.008(3) -0.026(4) 0.006(4)
C43 0.055(5) 0.036(4) 0.062(5) -0.001(4) -0.024(4) -0.004(4)
C44 0.058(5) 0.038(4) 0.054(5) -0.007(4) -0.021(4) 0.003(4)
C45 0.074(6) 0.063(6) 0.054(5) 0.004(4) -0.037(5) 0.003(5)
C46 0.078(6) 0.057(5) 0.046(4) 0.010(4) -0.027(4) -0.011(4)
C47 0.061(5) 0.063(6) 0.068(5) -0.004(5) -0.021(5) -0.007(4)
C48 0.104(9) 0.119(10) 0.141(11) -0.035(8) -0.053(8) -0.023(8)
C49 0.116(11) 0.193(16) 0.149(12) 0.050(11) -0.052(9) -0.074(11)
C50 0.115(10) 0.079(9) 0.42(3) 0.052(12) -0.175(15) -0.019(8)
N51 0.051(4) 0.027(3) 0.051(3) -0.007(3) -0.023(3) 0.009(3)
C52 0.053(5) 0.029(4) 0.054(5) -0.006(3) -0.021(4) 0.009(3)
C53 0.056(5) 0.041(5) 0.052(5) -0.009(4) -0.014(4) 0.008(4)
C54 0.079(6) 0.037(4) 0.048(5) -0.006(3) -0.018(4) 0.020(4)
C55 0.076(6) 0.050(5) 0.051(5) -0.018(4) -0.028(5) 0.021(4)
C56 0.070(5) 0.041(4) 0.048(5) -0.006(3) -0.026(4) 0.006(4)
C57 0.074(6) 0.060(6) 0.049(5) 0.001(4) -0.008(4) 0.013(5)
C58 0.184(13) 0.084(8) 0.062(6) -0.002(6) 0.007(7) -0.060(9)
C59 0.083(7) 0.101(8) 0.080(7) -0.043(6) 0.001(6) -0.014(6)
C60 0.123(11) 0.35(3) 0.103(10) 0.121(13) 0.018(8) 0.106(14)
C61 0.050(5) 0.056(6) 0.076(6) 0.009(4) -0.034(4) -0.003(4)
O62 0.074(4) 0.027(3) 0.123(5) -0.004(3) -0.049(4) 0.003(3)
C63 0.068(6) 0.038(5) 0.076(6) -0.002(4) -0.032(5) -0.004(4)
O64 0.121(6) 0.065(4) 0.063(4) 0.017(3) -0.016(4) -0.014(4)
C65 0.079(7) 0.030(5) 0.074(6) -0.006(4) -0.012(5) -0.008(4)
O66 0.071(4) 0.063(4) 0.118(5) -0.012(4) -0.046(4) 0.004(3)
C67 0.051(4) 0.053(5) 0.030(3) -0.003(3) -0.015(3) -0.015(4)
C68 0.039(4) 0.039(4) 0.034(3) 0.002(3) -0.014(3) -0.009(3)
C69 0.038(4) 0.054(5) 0.036(4) -0.007(3) -0.018(3) -0.006(3)
C70 0.060(5) 0.063(5) 0.036(4) -0.006(4) -0.024(4) -0.013(4)
C71 0.085(7) 0.063(6) 0.074(6) -0.010(5) -0.034(5) -0.015(5)
C72 0.117(9) 0.061(7) 0.104(8) -0.016(6) -0.054(7) -0.027(6)
C73 0.109(10) 0.120(11) 0.099(8) -0.016(7) -0.048(7) -0.053(8)
C74 0.086(8) 0.149(12) 0.169(12) -0.067(10) -0.040(8) -0.048(8)
C75 0.061(6) 0.136(10) 0.108(8) -0.059(7) -0.022(6) -0.024(6)
C76 0.049(4) 0.044(4) 0.036(4) 0.000(3) -0.019(3) -0.003(3)
C77 0.064(5) 0.082(6) 0.038(4) -0.003(4) -0.028(4) 0.016(5)
C78 0.098(7) 0.095(8) 0.062(6) -0.014(5) -0.044(5) 0.046(6)
C79 0.124(9) 0.065(6) 0.077(7) -0.007(5) -0.051(6) 0.035(6)
C80 0.103(8) 0.104(9) 0.064(6) 0.020(6) -0.037(6) 0.006(7)
C81 0.066(5) 0.074(6) 0.040(4) -0.001(4) -0.022(4) 0.012(5)
C82 0.058(5) 0.055(5) 0.031(4) 0.004(3) -0.014(3) -0.011(4)
C83 0.075(6) 0.062(5) 0.022(3) 0.000(3) -0.012(3) -0.014(4)
C84 0.115(8) 0.071(7) 0.041(5) 0.018(5) -0.032(5) -0.014(6)
C85 0.183(12) 0.065(7) 0.077(7) 0.031(6) -0.060(8) -0.009(7)
C86 0.205(13) 0.062(6) 0.051(6) -0.010(5) -0.055(7) 0.022(7)
C87 0.130(8) 0.058(6) 0.034(4) 0.000(4) -0.034(5) 0.009(5)
C88 0.047(4) 0.082(6) 0.017(3) 0.006(3) -0.007(3) -0.017(4)
C89 0.051(5) 0.076(6) 0.031(4) -0.008(4) 0.000(3) 0.000(4)
C90 0.064(6) 0.085(7) 0.044(5) -0.014(4) -0.015(4) 0.005(5)
C91 0.053(6) 0.125(10) 0.057(6) -0.016(6) -0.009(5) 0.003(6)
C92 0.065(6) 0.116(9) 0.051(5) 0.012(5) -0.003(5) -0.023(6)
C93 0.060(6) 0.086(7) 0.037(4) 0.002(4) -0.013(4) 0.001(5)
C94 0.057(5) 0.040(4) 0.044(4) 0.002(3) -0.028(4) -0.016(4)
C95 0.073(6) 0.054(5) 0.054(5) -0.012(4) -0.018(4) -0.008(4)
C96 0.100(7) 0.074(7) 0.049(5) -0.005(5) -0.019(5) -0.008(6)
C97 0.098(8) 0.052(6) 0.077(7) -0.018(5) -0.040(6) 0.005(5)
C98 0.087(7) 0.059(6) 0.094(7) -0.029(5) -0.035(6) -0.013(5)
C99 0.068(6) 0.050(5) 0.073(6) -0.018(4) -0.017(5) -0.011(4)
C100 0.048(5) 0.034(4) 0.074(5) 0.004(4) -0.023(4) -0.009(4)
C101 0.054(6) 0.141(11) 0.129(10) 0.069(8) 0.008(6) 0.005(7)
C102 0.043(7) 0.209(16) 0.214(16) 0.128(14) -0.003(8) 0.024(8)
C103 0.057(8) 0.103(10) 0.204(16) 0.042(10) 0.040(9) 0.001(7)
C104 0.075(7) 0.098(9) 0.089(7) -0.031(6) 0.009(6) -0.046(7)
C105 0.049(5) 0.109(8) 0.063(6) -0.012(5) -0.013(4) -0.040(5)
C106 0.037(4) 0.052(5) 0.033(4) 0.002(3) -0.013(3) -0.011(3)
C107 0.052(4) 0.050(5) 0.032(4) 0.006(3) -0.015(3) -0.017(4)
C108 0.049(5) 0.075(6) 0.037(4) 0.004(4) -0.009(4) -0.027(4)
C109 0.041(5) 0.067(6) 0.054(5) -0.008(4) 0.004(4) -0.014(4)
C110 0.036(4) 0.066(6) 0.071(6) -0.022(5) -0.011(4) 0.001(4)
C111 0.035(4) 0.046(4) 0.049(4) -0.010(3) -0.014(3) -0.003(3)
C112 0.041(4) 0.035(4) 0.032(3) 0.007(3) -0.013(3) -0.006(3)
C113 0.048(4) 0.056(5) 0.033(4) 0.002(3) -0.013(3) -0.010(4)
C114 0.066(5) 0.070(6) 0.034(4) 0.006(4) -0.020(4) -0.011(4)
C115 0.058(5) 0.067(6) 0.063(5) 0.004(4) -0.042(4) 0.004(4)
C116 0.043(4) 0.053(5) 0.060(5) -0.011(4) -0.018(4) 0.007(4)
C117 0.054(5) 0.040(4) 0.031(3) -0.004(3) -0.015(3) 0.003(3)
C118 0.048(5) 0.064(6) 0.047(4) 0.021(4) -0.018(4) -0.023(4)
C119 0.056(5) 0.058(6) 0.083(6) 0.019(5) -0.020(5) -0.006(4)
C120 0.061(6) 0.068(7) 0.114(8) 0.019(6) -0.033(6) -0.008(5)
C121 0.069(7) 0.079(7) 0.102(8) 0.019(6) -0.045(6) -0.007(6)
C122 0.078(7) 0.123(10) 0.072(6) 0.013(6) -0.052(6) -0.035(7)
C123 0.066(6) 0.080(6) 0.057(5) 0.010(4) -0.033(4) -0.024(5)
C124 0.048(4) 0.066(5) 0.039(4) -0.013(4) -0.023(3) -0.014(4)
C125 0.077(6) 0.067(6) 0.034(4) 0.001(4) -0.008(4) -0.017(5)
C126 0.085(7) 0.092(8) 0.042(5) -0.002(5) -0.018(5) -0.028(6)
C127 0.053(5) 0.113(8) 0.034(4) -0.008(5) -0.002(4) -0.006(5)
C128 0.075(7) 0.121(10) 0.073(7) -0.007(7) 0.003(6) 0.025(6)
C129 0.068(6) 0.068(6) 0.041(4) -0.008(4) -0.010(4) 0.011(5)
C130 0.049(5) 0.066(6) 0.041(4) 0.008(4) -0.018(4) -0.026(4)
C131 0.094(8) 0.070(7) 0.122(9) 0.035(7) 0.027(7) -0.015(6)
C132 0.139(11) 0.065(8) 0.157(12) 0.045(8) 0.017(10) -0.014(7)
C133 0.113(10) 0.107(11) 0.118(10) 0.056(8) -0.024(8) -0.064(9)
C134 0.102(9) 0.107(10) 0.084(8) 0.050(7) 0.000(6) -0.041(8)
C135 0.069(6) 0.109(8) 0.059(6) 0.024(5) -0.016(5) -0.016(6)
C136 0.037(4) 0.066(5) 0.040(4) 0.002(4) -0.009(3) -0.013(4)
C137 0.043(5) 0.077(6) 0.055(5) 0.007(4) -0.013(4) -0.021(4)
C138 0.058(6) 0.095(8) 0.072(6) -0.005(6) -0.024(5) -0.019(5)
C139 0.040(5) 0.126(10) 0.102(8) -0.020(7) -0.022(5) 0.009(6)
C140 0.069(7) 0.108(9) 0.097(8) -0.026(6) -0.020(6) 0.017(6)
C141 0.034(4) 0.085(7) 0.064(5) -0.020(5) -0.010(4) 0.001(4)
P150 0.0740(18) 0.085(2) 0.0837(17) 0.0371(14) -0.0509(14) -0.0356(14)
F151 0.097(5) 0.181(7) 0.128(5) 0.016(5) -0.055(4) 0.009(5)
F152 0.086(4) 0.182(7) 0.080(4) 0.047(4) -0.049(3) -0.055(4)
F153 0.409(18) 0.142(8) 0.212(10) 0.087(7) -0.156(11) -0.179(10)
F154 0.061(4) 0.52(2) 0.094(5) 0.049(8) -0.040(4) -0.043(7)
F155 0.117(5) 0.151(6) 0.088(4) 0.055(4) -0.065(4) -0.059(4)
F156 0.234(9) 0.083(5) 0.117(5) 0.019(4) -0.067(6) -0.034(5)
C160 0.064(7) 0.189(13) 0.075(7) -0.025(7) -0.017(5) -0.010(7)
Cl14 0.173(3) 0.0674(17) 0.0786(17) -0.0100(14) -0.0301(18) -0.0022(18)
Cl15 0.104(3) 0.266(6) 0.197(4) 0.098(4) -0.081(3) -0.064(3)
C161 0.149(13) 0.056(8) 0.080(8) 0.005(6) -0.077(9) -0.035(8)
Cl16 0.214(5) 0.052(2) 0.163(4) -0.012(2) -0.150(4) 0.001(2)
Cl17 0.113(3) 0.073(2) 0.0657(18) -0.0034(16) -0.0437(18) -0.0005(19)
C162 0.042(13) 0.36(5) 0.076(16) -0.02(2) -0.009(12) 0.00(2)
Cl18 0.123(8) 0.58(3) 0.191(10) -0.112(14) 0.011(7) -0.178(13)
Cl19 0.150(9) 0.55(3) 0.144(8) 0.048(12) -0.068(7) 0.015(12)
 
_geom_special_details
;
 All esds (except the esd in the dihedral angle between two l.s. planes)
 are estimated using the full covariance matrix.  The cell esds are taken
 into account individually in the estimation of esds in distances, angles
 and torsion angles; correlations between esds in cell parameters are only
 used when they are defined by crystal symmetry.  An approximate (isotropic)
 treatment of cell esds is used for estimating esds involving l.s. planes.
;
 
loop_
 _geom_bond_atom_site_label_1
 _geom_bond_atom_site_label_2
 _geom_bond_distance
 _geom_bond_site_symmetry_2
 _geom_bond_publ_flag
Re1 C33 1.901(9) . ?
Re1 C35 1.905(10) . ?
Re1 C31 1.952(9) . ?
Re1 C1 2.078(7) . ?
Re1 N21 2.174(6) . ?
Re1 N11 2.178(6) . ?
Re2 C65 1.915(10) . ?
Re2 C63 1.932(10) . ?
Re2 C61 1.966(9) . ?
Re2 C8 2.121(7) . ?
Re2 N51 2.159(6) . ?
Re2 N41 2.165(6) . ?
Cu3 C5 2.035(6) . ?
Cu3 P8 2.2651(19) . ?
Cu3 P7 2.3013(17) . ?
Cu3 C4 2.488(7) . ?
Cu3 Cu4 2.6004(10) . ?
Cu3 Cu5 2.7176(11) . ?
Cu4 C4 2.129(6) . ?
Cu4 C5 2.159(6) . ?
Cu4 P9 2.2653(18) . ?
Cu4 P10 2.2739(18) . ?
Cu4 Cu5 2.5528(10) . ?
Cu5 C4 2.099(7) . ?
Cu5 P6 2.2420(16) . ?
Cu5 P11 2.2763(19) . ?
Cu5 C5 2.328(6) . ?
C1 C2 1.258(10) . ?
C2 C3 1.382(10) . ?
C3 C4 1.191(9) . ?
C5 C6 1.211(8) . ?
C6 C7 1.380(9) . ?
P6 C82 1.816(7) . ?
P6 C88 1.820(7) . ?
P6 C67 1.854(7) . ?
C7 C8 1.210(9) . ?
P7 C70 1.821(7) . ?
P7 C76 1.829(7) . ?
P7 C67 1.831(7) . ?
P8 C100 1.820(8) . ?
P8 C68 1.835(6) . ?
P8 C94 1.836(7) . ?
P9 C112 1.819(6) . ?
P9 C106 1.827(7) . ?
P9 C68 1.841(6) . ?
P10 C118 1.832(7) . ?
P10 C124 1.835(7) . ?
P10 C69 1.840(7) . ?
P11 C130 1.825(8) . ?
P11 C69 1.827(6) . ?
P11 C136 1.827(7) . ?
N11 C12 1.334(10) . ?
N11 C16 1.336(8) . ?
C12 C13 1.367(13) . ?
C12 H12 0.9500 . ?
C13 C14 1.389(11) . ?
C13 H13 0.9500 . ?
C14 C15 1.404(10) . ?
C14 C17 1.509(12) . ?
C15 C16 1.385(10) . ?
C15 H15 0.9500 . ?
C16 C22 1.481(9) . ?
C17 C19 1.504(14) . ?
C17 C20 1.527(12) . ?
C17 C18 1.537(14) . ?
C18 H18A 0.9800 . ?
C18 H18B 0.9800 . ?
C18 H18C 0.9800 . ?
C19 H19A 0.9800 . ?
C19 H19B 0.9800 . ?
C19 H19C 0.9800 . ?
C20 H20A 0.9800 . ?
C20 H20B 0.9800 . ?
C20 H20C 0.9800 . ?
N21 C26 1.324(9) . ?
N21 C22 1.374(8) . ?
C22 C23 1.375(9) . ?
C23 C24 1.399(9) . ?
C23 H23 0.9500 . ?
C24 C25 1.398(9) . ?
C24 C27 1.545(10) . ?
C25 C26 1.339(10) . ?
C25 H25 0.9500 . ?
C26 H26 0.9500 . ?
C27 C29 1.487(11) . ?
C27 C28 1.529(11) . ?
C27 C30 1.546(10) . ?
C28 H28A 0.9800 . ?
C28 H28B 0.9800 . ?
C28 H28C 0.9800 . ?
C29 H29A 0.9800 . ?
C29 H29B 0.9800 . ?
C29 H29C 0.9800 . ?
C30 H30A 0.9800 . ?
C30 H30B 0.9800 . ?
C30 H30C 0.9800 . ?
C31 O32 1.145(9) . ?
C33 O34 1.153(10) . ?
C35 O36 1.144(10) . ?
N41 C42 1.350(9) . ?
N41 C46 1.358(9) . ?
C42 C43 1.396(10) . ?
C42 C52 1.498(9) . ?
C43 C44 1.375(10) . ?
C43 H43 0.9500 . ?
C44 C45 1.382(11) . ?
C44 C47 1.539(11) . ?
C45 C46 1.381(11) . ?
C45 H45 0.9500 . ?
C46 H46 0.9500 . ?
C47 C50 1.443(13) . ?
C47 C49 1.509(13) . ?
C47 C48 1.529(13) . ?
C48 H48A 0.9800 . ?
C48 H48B 0.9800 . ?
C48 H48C 0.9800 . ?
C49 H49A 0.9800 . ?
C49 H49B 0.9800 . ?
C49 H49C 0.9800 . ?
C50 H50A 0.9800 . ?
C50 H50B 0.9800 . ?
C50 H50C 0.9800 . ?
N51 C56 1.350(8) . ?
N51 C52 1.351(9) . ?
C52 C53 1.367(10) . ?
C53 C54 1.408(10) . ?
C53 H53 0.9500 . ?
C54 C55 1.417(11) . ?
C54 C57 1.495(11) . ?
C55 C56 1.327(10) . ?
C55 H55 0.9500 . ?
C56 H56 0.9500 . ?
C57 C59 1.507(12) . ?
C57 C60 1.513(13) . ?
C57 C58 1.523(14) . ?
C58 H58A 0.9800 . ?
C58 H58B 0.9800 . ?
C58 H58C 0.9800 . ?
C59 H59A 0.9800 . ?
C59 H59B 0.9800 . ?
C59 H59C 0.9800 . ?
C60 H60A 0.9800 . ?
C60 H60B 0.9800 . ?
C60 H60C 0.9800 . ?
C61 O62 1.143(9) . ?
C63 O64 1.139(9) . ?
C65 O66 1.143(10) . ?
C67 H67A 0.9900 . ?
C67 H67B 0.9900 . ?
C68 H68A 0.9900 . ?
C68 H68B 0.9900 . ?
C69 H69A 0.9900 . ?
C69 H69B 0.9900 . ?
C70 C75 1.377(11) . ?
C70 C71 1.404(11) . ?
C71 C72 1.354(12) . ?
C71 H71 0.9500 . ?
C72 C73 1.359(14) . ?
C72 H72 0.9500 . ?
C73 C74 1.379(15) . ?
C73 H73 0.9500 . ?
C74 C75 1.440(13) . ?
C74 H74 0.9500 . ?
C75 H75 0.9500 . ?
C76 C81 1.378(9) . ?
C76 C77 1.386(9) . ?
C77 C78 1.371(11) . ?
C77 H77 0.9500 . ?
C78 C79 1.382(12) . ?
C78 H78 0.9500 . ?
C79 C80 1.414(13) . ?
C79 H79 0.9500 . ?
C80 C81 1.363(12) . ?
C80 H80 0.9500 . ?
C81 H81 0.9500 . ?
C82 C87 1.380(10) . ?
C82 C83 1.393(9) . ?
C83 C84 1.361(11) . ?
C83 H83 0.9500 . ?
C84 C85 1.361(13) . ?
C84 H84 0.9500 . ?
C85 C86 1.389(12) . ?
C85 H85 0.9500 . ?
C86 C87 1.359(11) . ?
C86 H86 0.9500 . ?
C87 H87 0.9500 . ?
C88 C89 1.387(11) . ?
C88 C93 1.398(11) . ?
C89 C90 1.370(11) . ?
C89 H89 0.9500 . ?
C90 C91 1.373(13) . ?
C90 H90 0.9500 . ?
C91 C92 1.375(13) . ?
C91 H91 0.9500 . ?
C92 C93 1.397(12) . ?
C92 H92 0.9500 . ?
C93 H93 0.9500 . ?
C94 C95 1.347(10) . ?
C94 C99 1.365(10) . ?
C95 C96 1.400(11) . ?
C95 H95 0.9500 . ?
C96 C97 1.375(13) . ?
C96 H96 0.9500 . ?
C97 C98 1.348(12) . ?
C97 H97 0.9500 . ?
C98 C99 1.395(11) . ?
C98 H98 0.9500 . ?
C99 H99 0.9500 . ?
C100 C101 1.283(12) . ?
C100 C105 1.378(11) . ?
C101 C102 1.410(14) . ?
C101 H101 0.9500 . ?
C102 C103 1.330(17) . ?
C102 H102 0.9500 . ?
C103 C104 1.305(16) . ?
C103 H103 0.9500 . ?
C104 C105 1.368(12) . ?
C104 H104 0.9500 . ?
C105 H105 0.9500 . ?
C106 C111 1.372(9) . ?
C106 C107 1.409(9) . ?
C107 C108 1.368(9) . ?
C107 H107 0.9500 . ?
C108 C109 1.360(11) . ?
C108 H108 0.9500 . ?
C109 C110 1.377(11) . ?
C109 H109 0.9500 . ?
C110 C111 1.417(10) . ?
C110 H110 0.9500 . ?
C111 H111 0.9500 . ?
C112 C117 1.383(9) . ?
C112 C113 1.415(8) . ?
C113 C114 1.388(10) . ?
C113 H113 0.9500 . ?
C114 C115 1.399(10) . ?
C114 H114 0.9500 . ?
C115 C116 1.360(10) . ?
C115 H115 0.9500 . ?
C116 C117 1.417(9) . ?
C116 H116 0.9500 . ?
C117 H117 0.9500 . ?
C118 C119 1.360(11) . ?
C118 C123 1.419(11) . ?
C119 C120 1.430(11) . ?
C119 H119 0.9500 . ?
C120 C121 1.360(13) . ?
C120 H120 0.9500 . ?
C121 C122 1.325(13) . ?
C121 H121 0.9500 . ?
C122 C123 1.372(11) . ?
C122 H122 0.9500 . ?
C123 H123 0.9500 . ?
C124 C129 1.338(10) . ?
C124 C125 1.418(10) . ?
C125 C126 1.395(11) . ?
C125 H125 0.9500 . ?
C126 C127 1.344(12) . ?
C126 H126 0.9500 . ?
C127 C128 1.344(12) . ?
C127 H127 0.9500 . ?
C128 C129 1.409(11) . ?
C128 H128 0.9500 . ?
C129 H129 0.9500 . ?
C130 C131 1.369(12) . ?
C130 C135 1.372(11) . ?
C131 C132 1.416(13) . ?
C131 H131 0.9500 . ?
C132 C133 1.325(15) . ?
C132 H132 0.9500 . ?
C133 C134 1.390(16) . ?
C133 H133 0.9500 . ?
C134 C135 1.402(13) . ?
C134 H134 0.9500 . ?
C135 H135 0.9500 . ?
C136 C137 1.381(10) . ?
C136 C141 1.389(10) . ?
C137 C138 1.381(11) . ?
C137 H137 0.9500 . ?
C138 C139 1.345(13) . ?
C138 H138 0.9500 . ?
C139 C140 1.443(13) . ?
C139 H139 0.9500 . ?
C140 C141 1.379(11) . ?
C140 H140 0.9500 . ?
C141 H141 0.9500 . ?
P150 F153 1.502(9) . ?
P150 F154 1.529(7) . ?
P150 F151 1.531(7) . ?
P150 F156 1.568(7) . ?
P150 F152 1.586(5) . ?
P150 F155 1.602(5) . ?
C160 Cl14 1.659(10) . ?
C160 Cl15 1.744(10) . ?
C160 H16A 0.9900 . ?
C160 H16B 0.9900 . ?
C161 Cl17 1.712(13) . ?
C161 Cl16 1.758(10) . ?
C161 H16C 0.9900 . ?
C161 H16D 0.9900 . ?
C162 Cl18 1.595(18) . ?
C162 Cl19 1.711(18) . ?
C162 H16E 0.9900 . ?
C162 H16F 0.9900 . ?
 
loop_
 _geom_angle_atom_site_label_1
 _geom_angle_atom_site_label_2
 _geom_angle_atom_site_label_3
 _geom_angle
 _geom_angle_site_symmetry_1
 _geom_angle_site_symmetry_3
 _geom_angle_publ_flag
C33 Re1 C35 89.1(4) . . ?
C33 Re1 C31 91.6(3) . . ?
C35 Re1 C31 88.8(4) . . ?
C33 Re1 C1 91.8(3) . . ?
C35 Re1 C1 96.7(3) . . ?
C31 Re1 C1 173.6(3) . . ?
C33 Re1 N21 171.4(4) . . ?
C35 Re1 N21 98.1(3) . . ?
C31 Re1 N21 93.2(3) . . ?
C1 Re1 N21 82.8(2) . . ?
C33 Re1 N11 98.3(3) . . ?
C35 Re1 N11 172.5(3) . . ?
C31 Re1 N11 89.8(3) . . ?
C1 Re1 N11 84.2(2) . . ?
N21 Re1 N11 74.6(2) . . ?
C65 Re2 C63 88.5(3) . . ?
C65 Re2 C61 90.7(3) . . ?
C63 Re2 C61 89.5(3) . . ?
C65 Re2 C8 87.3(3) . . ?
C63 Re2 C8 96.4(3) . . ?
C61 Re2 C8 173.7(3) . . ?
C65 Re2 N51 98.4(3) . . ?
C63 Re2 N51 172.9(3) . . ?
C61 Re2 N51 89.1(3) . . ?
C8 Re2 N51 85.3(2) . . ?
C65 Re2 N41 171.4(3) . . ?
C63 Re2 N41 98.7(3) . . ?
C61 Re2 N41 93.9(3) . . ?
C8 Re2 N41 87.3(2) . . ?
N51 Re2 N41 74.5(2) . . ?
C5 Cu3 P8 129.22(18) . . ?
C5 Cu3 P7 109.75(18) . . ?
P8 Cu3 P7 113.58(7) . . ?
C5 Cu3 C4 90.2(2) . . ?
P8 Cu3 C4 95.65(17) . . ?
P7 Cu3 C4 113.58(15) . . ?
C5 Cu3 Cu4 53.86(17) . . ?
P8 Cu3 Cu4 94.19(5) . . ?
P7 Cu3 Cu4 150.00(6) . . ?
C4 Cu3 Cu4 49.41(14) . . ?
C5 Cu3 Cu5 56.49(18) . . ?
P8 Cu3 Cu5 142.00(6) . . ?
P7 Cu3 Cu5 92.78(6) . . ?
C4 Cu3 Cu5 47.30(16) . . ?
Cu4 Cu3 Cu5 57.32(3) . . ?
C4 Cu4 C5 97.3(2) . . ?
C4 Cu4 P9 103.37(19) . . ?
C5 Cu4 P9 123.25(18) . . ?
C4 Cu4 P10 123.48(19) . . ?
C5 Cu4 P10 101.17(18) . . ?
P9 Cu4 P10 109.48(6) . . ?
C4 Cu4 Cu5 52.31(18) . . ?
C5 Cu4 Cu5 58.51(16) . . ?
P9 Cu4 Cu5 153.02(5) . . ?
P10 Cu4 Cu5 95.46(5) . . ?
C4 Cu4 Cu3 62.54(17) . . ?
C5 Cu4 Cu3 49.58(17) . . ?
P9 Cu4 Cu3 96.32(5) . . ?
P10 Cu4 Cu3 149.51(6) . . ?
Cu5 Cu4 Cu3 63.65(3) . . ?
C4 Cu5 P6 106.50(17) . . ?
C4 Cu5 P11 116.53(18) . . ?
P6 Cu5 P11 114.12(7) . . ?
C4 Cu5 C5 93.2(2) . . ?
P6 Cu5 C5 117.55(15) . . ?
P11 Cu5 C5 107.54(16) . . ?
C4 Cu5 Cu4 53.40(17) . . ?
P6 Cu5 Cu4 151.00(6) . . ?
P11 Cu5 Cu4 94.60(5) . . ?
C5 Cu5 Cu4 52.26(15) . . ?
C4 Cu5 Cu3 60.59(18) . . ?
P6 Cu5 Cu3 93.72(6) . . ?
P11 Cu5 Cu3 150.37(5) . . ?
C5 Cu5 Cu3 46.80(16) . . ?
Cu4 Cu5 Cu3 59.03(3) . . ?
C2 C1 Re1 171.0(6) . . ?
C1 C2 C3 175.6(8) . . ?
C4 C3 C2 179.3(8) . . ?
C3 C4 Cu5 141.5(6) . . ?
C3 C4 Cu4 143.7(6) . . ?
Cu5 C4 Cu4 74.3(2) . . ?
C3 C4 Cu3 119.9(6) . . ?
Cu5 C4 Cu3 72.1(2) . . ?
Cu4 C4 Cu3 68.05(19) . . ?
C6 C5 Cu3 148.0(5) . . ?
C6 C5 Cu4 134.6(5) . . ?
Cu3 C5 Cu4 76.6(2) . . ?
C6 C5 Cu5 105.1(5) . . ?
Cu3 C5 Cu5 76.7(2) . . ?
Cu4 C5 Cu5 69.23(18) . . ?
C5 C6 C7 179.4(8) . . ?
C82 P6 C88 105.6(3) . . ?
C82 P6 C67 103.2(3) . . ?
C88 P6 C67 103.6(3) . . ?
C82 P6 Cu5 121.2(2) . . ?
C88 P6 Cu5 107.8(2) . . ?
C67 P6 Cu5 113.8(2) . . ?
C8 C7 C6 178.9(7) . . ?
C70 P7 C76 100.7(3) . . ?
C70 P7 C67 103.0(3) . . ?
C76 P7 C67 105.2(3) . . ?
C70 P7 Cu3 122.1(2) . . ?
C76 P7 Cu3 116.0(2) . . ?
C67 P7 Cu3 108.0(2) . . ?
C7 C8 Re2 173.9(6) . . ?
C100 P8 C68 105.7(3) . . ?
C100 P8 C94 106.2(3) . . ?
C68 P8 C94 99.8(3) . . ?
C100 P8 Cu3 113.2(2) . . ?
C68 P8 Cu3 113.5(2) . . ?
C94 P8 Cu3 117.1(2) . . ?
C112 P9 C106 104.8(3) . . ?
C112 P9 C68 102.2(3) . . ?
C106 P9 C68 104.3(3) . . ?
C112 P9 Cu4 112.7(2) . . ?
C106 P9 Cu4 121.7(2) . . ?
C68 P9 Cu4 109.2(2) . . ?
C118 P10 C124 101.9(3) . . ?
C118 P10 C69 102.4(3) . . ?
C124 P10 C69 106.6(3) . . ?
C118 P10 Cu4 122.7(3) . . ?
C124 P10 Cu4 110.7(2) . . ?
C69 P10 Cu4 111.3(2) . . ?
C130 P11 C69 103.5(3) . . ?
C130 P11 C136 101.2(3) . . ?
C69 P11 C136 105.4(3) . . ?
C130 P11 Cu5 121.9(2) . . ?
C69 P11 Cu5 108.8(2) . . ?
C136 P11 Cu5 114.5(3) . . ?
C12 N11 C16 118.5(7) . . ?
C12 N11 Re1 123.5(6) . . ?
C16 N11 Re1 118.0(5) . . ?
N11 C12 C13 122.7(9) . . ?
N11 C12 H12 118.7 . . ?
C13 C12 H12 118.7 . . ?
C12 C13 C14 121.3(8) . . ?
C12 C13 H13 119.3 . . ?
C14 C13 H13 119.3 . . ?
C13 C14 C15 114.8(8) . . ?
C13 C14 C17 125.5(8) . . ?
C15 C14 C17 119.8(8) . . ?
C16 C15 C14 121.4(7) . . ?
C16 C15 H15 119.3 . . ?
C14 C15 H15 119.3 . . ?
N11 C16 C15 121.1(7) . . ?
N11 C16 C22 115.2(6) . . ?
C15 C16 C22 123.7(6) . . ?
C19 C17 C14 107.6(9) . . ?
C19 C17 C20 111.4(9) . . ?
C14 C17 C20 109.8(7) . . ?
C19 C17 C18 108.4(10) . . ?
C14 C17 C18 111.8(9) . . ?
C20 C17 C18 107.8(10) . . ?
C17 C18 H18A 109.5 . . ?
C17 C18 H18B 109.5 . . ?
H18A C18 H18B 109.5 . . ?
C17 C18 H18C 109.5 . . ?
H18A C18 H18C 109.5 . . ?
H18B C18 H18C 109.5 . . ?
C17 C19 H19A 109.5 . . ?
C17 C19 H19B 109.5 . . ?
H19A C19 H19B 109.5 . . ?
C17 C19 H19C 109.5 . . ?
H19A C19 H19C 109.5 . . ?
H19B C19 H19C 109.5 . . ?
C17 C20 H20A 109.5 . . ?
C17 C20 H20B 109.5 . . ?
H20A C20 H20B 109.5 . . ?
C17 C20 H20C 109.5 . . ?
H20A C20 H20C 109.5 . . ?
H20B C20 H20C 109.5 . . ?
C26 N21 C22 117.3(6) . . ?
C26 N21 Re1 125.3(5) . . ?
C22 N21 Re1 116.8(5) . . ?
N21 C22 C23 121.3(6) . . ?
N21 C22 C16 115.1(6) . . ?
C23 C22 C16 123.6(6) . . ?
C22 C23 C24 120.8(6) . . ?
C22 C23 H23 119.6 . . ?
C24 C23 H23 119.6 . . ?
C25 C24 C23 115.2(6) . . ?
C25 C24 C27 124.6(6) . . ?
C23 C24 C27 120.2(6) . . ?
C26 C25 C24 121.5(7) . . ?
C26 C25 H25 119.2 . . ?
C24 C25 H25 119.2 . . ?
N21 C26 C25 123.7(7) . . ?
N21 C26 H26 118.1 . . ?
C25 C26 H26 118.1 . . ?
C29 C27 C28 109.8(7) . . ?
C29 C27 C24 110.4(6) . . ?
C28 C27 C24 106.7(7) . . ?
C29 C27 C30 109.5(7) . . ?
C28 C27 C30 108.6(7) . . ?
C24 C27 C30 111.8(6) . . ?
C27 C28 H28A 109.5 . . ?
C27 C28 H28B 109.5 . . ?
H28A C28 H28B 109.5 . . ?
C27 C28 H28C 109.5 . . ?
H28A C28 H28C 109.5 . . ?
H28B C28 H28C 109.5 . . ?
C27 C29 H29A 109.5 . . ?
C27 C29 H29B 109.5 . . ?
H29A C29 H29B 109.5 . . ?
C27 C29 H29C 109.5 . . ?
H29A C29 H29C 109.5 . . ?
H29B C29 H29C 109.5 . . ?
C27 C30 H30A 109.5 . . ?
C27 C30 H30B 109.5 . . ?
H30A C30 H30B 109.5 . . ?
C27 C30 H30C 109.5 . . ?
H30A C30 H30C 109.5 . . ?
H30B C30 H30C 109.5 . . ?
O32 C31 Re1 177.1(8) . . ?
O34 C33 Re1 177.2(10) . . ?
O36 C35 Re1 175.6(8) . . ?
C42 N41 C46 116.5(7) . . ?
C42 N41 Re2 118.9(5) . . ?
C46 N41 Re2 124.5(5) . . ?
N41 C42 C43 123.6(7) . . ?
N41 C42 C52 113.2(7) . . ?
C43 C42 C52 123.2(7) . . ?
C44 C43 C42 119.8(7) . . ?
C44 C43 H43 120.1 . . ?
C42 C43 H43 120.1 . . ?
C43 C44 C45 116.3(7) . . ?
C43 C44 C47 122.6(7) . . ?
C45 C44 C47 121.1(7) . . ?
C46 C45 C44 122.2(7) . . ?
C46 C45 H45 118.9 . . ?
C44 C45 H45 118.9 . . ?
N41 C46 C45 121.5(8) . . ?
N41 C46 H46 119.2 . . ?
C45 C46 H46 119.2 . . ?
C50 C47 C49 113.1(11) . . ?
C50 C47 C48 107.9(10) . . ?
C49 C47 C48 103.2(9) . . ?
C50 C47 C44 109.0(8) . . ?
C49 C47 C44 113.5(8) . . ?
C48 C47 C44 109.8(7) . . ?
C47 C48 H48A 109.5 . . ?
C47 C48 H48B 109.5 . . ?
H48A C48 H48B 109.5 . . ?
C47 C48 H48C 109.5 . . ?
H48A C48 H48C 109.5 . . ?
H48B C48 H48C 109.5 . . ?
C47 C49 H49A 109.5 . . ?
C47 C49 H49B 109.5 . . ?
H49A C49 H49B 109.5 . . ?
C47 C49 H49C 109.5 . . ?
H49A C49 H49C 109.5 . . ?
H49B C49 H49C 109.5 . . ?
C47 C50 H50A 109.5 . . ?
C47 C50 H50B 109.5 . . ?
H50A C50 H50B 109.5 . . ?
C47 C50 H50C 109.5 . . ?
H50A C50 H50C 109.5 . . ?
H50B C50 H50C 109.5 . . ?
C56 N51 C52 117.4(6) . . ?
C56 N51 Re2 124.9(5) . . ?
C52 N51 Re2 117.6(4) . . ?
N51 C52 C53 121.5(7) . . ?
N51 C52 C42 115.7(7) . . ?
C53 C52 C42 122.8(7) . . ?
C52 C53 C54 121.1(8) . . ?
C52 C53 H53 119.4 . . ?
C54 C53 H53 119.4 . . ?
C53 C54 C55 115.4(7) . . ?
C53 C54 C57 122.8(8) . . ?
C55 C54 C57 121.7(7) . . ?
C56 C55 C54 120.0(7) . . ?
C56 C55 H55 120.0 . . ?
C54 C55 H55 120.0 . . ?
C55 C56 N51 124.5(8) . . ?
C55 C56 H56 117.7 . . ?
N51 C56 H56 117.7 . . ?
C54 C57 C59 108.7(7) . . ?
C54 C57 C60 111.4(8) . . ?
C59 C57 C60 107.8(10) . . ?
C54 C57 C58 111.3(7) . . ?
C59 C57 C58 107.9(8) . . ?
C60 C57 C58 109.6(11) . . ?
C57 C58 H58A 109.5 . . ?
C57 C58 H58B 109.5 . . ?
H58A C58 H58B 109.5 . . ?
C57 C58 H58C 109.5 . . ?
H58A C58 H58C 109.5 . . ?
H58B C58 H58C 109.5 . . ?
C57 C59 H59A 109.5 . . ?
C57 C59 H59B 109.5 . . ?
H59A C59 H59B 109.5 . . ?
C57 C59 H59C 109.5 . . ?
H59A C59 H59C 109.5 . . ?
H59B C59 H59C 109.5 . . ?
C57 C60 H60A 109.5 . . ?
C57 C60 H60B 109.5 . . ?
H60A C60 H60B 109.5 . . ?
C57 C60 H60C 109.5 . . ?
H60A C60 H60C 109.5 . . ?
H60B C60 H60C 109.5 . . ?
O62 C61 Re2 178.1(7) . . ?
O64 C63 Re2 176.4(8) . . ?
O66 C65 Re2 174.7(7) . . ?
P7 C67 P6 110.1(3) . . ?
P7 C67 H67A 109.6 . . ?
P6 C67 H67A 109.6 . . ?
P7 C67 H67B 109.6 . . ?
P6 C67 H67B 109.6 . . ?
H67A C67 H67B 108.2 . . ?
P8 C68 P9 111.1(3) . . ?
P8 C68 H68A 109.4 . . ?
P9 C68 H68A 109.4 . . ?
P8 C68 H68B 109.4 . . ?
P9 C68 H68B 109.4 . . ?
H68A C68 H68B 108.0 . . ?
P11 C69 P10 108.3(4) . . ?
P11 C69 H69A 110.0 . . ?
P10 C69 H69A 110.0 . . ?
P11 C69 H69B 110.0 . . ?
P10 C69 H69B 110.0 . . ?
H69A C69 H69B 108.4 . . ?
C75 C70 C71 117.5(8) . . ?
C75 C70 P7 119.2(6) . . ?
C71 C70 P7 123.2(6) . . ?
C72 C71 C70 122.1(9) . . ?
C72 C71 H71 118.9 . . ?
C70 C71 H71 118.9 . . ?
C71 C72 C73 121.4(10) . . ?
C71 C72 H72 119.3 . . ?
C73 C72 H72 119.3 . . ?
C72 C73 C74 119.4(10) . . ?
C72 C73 H73 120.3 . . ?
C74 C73 H73 120.3 . . ?
C73 C74 C75 119.8(11) . . ?
C73 C74 H74 120.1 . . ?
C75 C74 H74 120.1 . . ?
C70 C75 C74 119.8(10) . . ?
C70 C75 H75 120.1 . . ?
C74 C75 H75 120.1 . . ?
C81 C76 C77 118.5(7) . . ?
C81 C76 P7 121.9(5) . . ?
C77 C76 P7 119.6(5) . . ?
C78 C77 C76 122.4(7) . . ?
C78 C77 H77 118.8 . . ?
C76 C77 H77 118.8 . . ?
C77 C78 C79 118.3(8) . . ?
C77 C78 H78 120.9 . . ?
C79 C78 H78 120.9 . . ?
C78 C79 C80 120.3(8) . . ?
C78 C79 H79 119.9 . . ?
C80 C79 H79 119.9 . . ?
C81 C80 C79 119.3(8) . . ?
C81 C80 H80 120.3 . . ?
C79 C80 H80 120.3 . . ?
C80 C81 C76 121.2(8) . . ?
C80 C81 H81 119.4 . . ?
C76 C81 H81 119.4 . . ?
C87 C82 C83 118.1(7) . . ?
C87 C82 P6 118.7(5) . . ?
C83 C82 P6 123.1(6) . . ?
C84 C83 C82 120.9(7) . . ?
C84 C83 H83 119.6 . . ?
C82 C83 H83 119.6 . . ?
C83 C84 C85 120.1(8) . . ?
C83 C84 H84 120.0 . . ?
C85 C84 H84 120.0 . . ?
C84 C85 C86 120.2(9) . . ?
C84 C85 H85 119.9 . . ?
C86 C85 H85 119.9 . . ?
C87 C86 C85 119.5(9) . . ?
C87 C86 H86 120.2 . . ?
C85 C86 H86 120.2 . . ?
C86 C87 C82 121.2(7) . . ?
C86 C87 H87 119.4 . . ?
C82 C87 H87 119.4 . . ?
C89 C88 C93 118.4(7) . . ?
C89 C88 P6 119.8(6) . . ?
C93 C88 P6 120.6(7) . . ?
C90 C89 C88 121.7(8) . . ?
C90 C89 H89 119.2 . . ?
C88 C89 H89 119.2 . . ?
C89 C90 C91 119.6(9) . . ?
C89 C90 H90 120.2 . . ?
C91 C90 H90 120.2 . . ?
C90 C91 C92 120.6(9) . . ?
C90 C91 H91 119.7 . . ?
C92 C91 H91 119.7 . . ?
C91 C92 C93 119.9(9) . . ?
C91 C92 H92 120.0 . . ?
C93 C92 H92 120.0 . . ?
C92 C93 C88 119.8(9) . . ?
C92 C93 H93 120.1 . . ?
C88 C93 H93 120.1 . . ?
C95 C94 C99 118.8(7) . . ?
C95 C94 P8 118.1(6) . . ?
C99 C94 P8 123.1(6) . . ?
C94 C95 C96 122.4(8) . . ?
C94 C95 H95 118.8 . . ?
C96 C95 H95 118.8 . . ?
C97 C96 C95 117.0(9) . . ?
C97 C96 H96 121.5 . . ?
C95 C96 H96 121.5 . . ?
C98 C97 C96 121.9(8) . . ?
C98 C97 H97 119.1 . . ?
C96 C97 H97 119.1 . . ?
C97 C98 C99 119.1(9) . . ?
C97 C98 H98 120.4 . . ?
C99 C98 H98 120.4 . . ?
C94 C99 C98 120.7(9) . . ?
C94 C99 H99 119.6 . . ?
C98 C99 H99 119.6 . . ?
C101 C100 C105 115.7(9) . . ?
C101 C100 P8 118.4(7) . . ?
C105 C100 P8 125.3(6) . . ?
C100 C101 C102 123.2(10) . . ?
C100 C101 H101 118.4 . . ?
C102 C101 H101 118.4 . . ?
C103 C102 C101 117.8(11) . . ?
C103 C102 H102 121.1 . . ?
C101 C102 H102 121.1 . . ?
C104 C103 C102 120.9(11) . . ?
C104 C103 H103 119.6 . . ?
C102 C103 H103 119.6 . . ?
C103 C104 C105 119.3(12) . . ?
C103 C104 H104 120.3 . . ?
C105 C104 H104 120.3 . . ?
C104 C105 C100 122.3(10) . . ?
C104 C105 H105 118.9 . . ?
C100 C105 H105 118.9 . . ?
C111 C106 C107 119.3(6) . . ?
C111 C106 P9 118.6(5) . . ?
C107 C106 P9 122.1(5) . . ?
C108 C107 C106 119.9(7) . . ?
C108 C107 H107 120.1 . . ?
C106 C107 H107 120.1 . . ?
C109 C108 C107 121.7(7) . . ?
C109 C108 H108 119.1 . . ?
C107 C108 H108 119.1 . . ?
C108 C109 C110 119.3(7) . . ?
C108 C109 H109 120.4 . . ?
C110 C109 H109 120.4 . . ?
C109 C110 C111 120.5(7) . . ?
C109 C110 H110 119.7 . . ?
C111 C110 H110 119.7 . . ?
C106 C111 C110 119.3(7) . . ?
C106 C111 H111 120.4 . . ?
C110 C111 H111 120.4 . . ?
C117 C112 C113 118.5(6) . . ?
C117 C112 P9 118.8(5) . . ?
C113 C112 P9 122.6(5) . . ?
C114 C113 C112 120.3(7) . . ?
C114 C113 H113 119.9 . . ?
C112 C113 H113 119.9 . . ?
C113 C114 C115 119.9(6) . . ?
C113 C114 H114 120.0 . . ?
C115 C114 H114 120.0 . . ?
C116 C115 C114 120.6(7) . . ?
C116 C115 H115 119.7 . . ?
C114 C115 H115 119.7 . . ?
C115 C116 C117 119.7(7) . . ?
C115 C116 H116 120.2 . . ?
C117 C116 H116 120.2 . . ?
C112 C117 C116 120.9(6) . . ?
C112 C117 H117 119.6 . . ?
C116 C117 H117 119.6 . . ?
C119 C118 C123 118.6(8) . . ?
C119 C118 P10 121.1(6) . . ?
C123 C118 P10 120.3(7) . . ?
C118 C119 C120 120.0(9) . . ?
C118 C119 H119 120.0 . . ?
C120 C119 H119 120.0 . . ?
C121 C120 C119 118.2(9) . . ?
C121 C120 H120 120.9 . . ?
C119 C120 H120 120.9 . . ?
C122 C121 C120 122.7(9) . . ?
C122 C121 H121 118.7 . . ?
C120 C121 H121 118.7 . . ?
C121 C122 C123 120.4(9) . . ?
C121 C122 H122 119.8 . . ?
C123 C122 H122 119.8 . . ?
C122 C123 C118 120.0(9) . . ?
C122 C123 H123 120.0 . . ?
C118 C123 H123 120.0 . . ?
C129 C124 C125 120.3(7) . . ?
C129 C124 P10 123.3(6) . . ?
C125 C124 P10 115.7(6) . . ?
C126 C125 C124 118.5(8) . . ?
C126 C125 H125 120.7 . . ?
C124 C125 H125 120.7 . . ?
C127 C126 C125 119.2(8) . . ?
C127 C126 H126 120.4 . . ?
C125 C126 H126 120.4 . . ?
C126 C127 C128 122.8(8) . . ?
C126 C127 H127 118.6 . . ?
C128 C127 H127 118.6 . . ?
C127 C128 C129 119.0(9) . . ?
C127 C128 H128 120.5 . . ?
C129 C128 H128 120.5 . . ?
C124 C129 C128 119.8(8) . . ?
C124 C129 H129 120.1 . . ?
C128 C129 H129 120.1 . . ?
C131 C130 C135 118.5(8) . . ?
C131 C130 P11 121.4(6) . . ?
C135 C130 P11 119.9(7) . . ?
C130 C131 C132 121.3(10) . . ?
C130 C131 H131 119.4 . . ?
C132 C131 H131 119.4 . . ?
C133 C132 C131 119.6(12) . . ?
C133 C132 H132 120.2 . . ?
C131 C132 H132 120.2 . . ?
C132 C133 C134 120.6(11) . . ?
C132 C133 H133 119.7 . . ?
C134 C133 H133 119.7 . . ?
C133 C134 C135 119.6(10) . . ?
C133 C134 H134 120.2 . . ?
C135 C134 H134 120.2 . . ?
C130 C135 C134 120.3(10) . . ?
C130 C135 H135 119.9 . . ?
C134 C135 H135 119.9 . . ?
C137 C136 C141 118.6(7) . . ?
C137 C136 P11 122.8(6) . . ?
C141 C136 P11 118.6(5) . . ?
C136 C137 C138 121.4(8) . . ?
C136 C137 H137 119.3 . . ?
C138 C137 H137 119.3 . . ?
C139 C138 C137 120.3(8) . . ?
C139 C138 H138 119.8 . . ?
C137 C138 H138 119.8 . . ?
C138 C139 C140 120.3(9) . . ?
C138 C139 H139 119.8 . . ?
C140 C139 H139 119.8 . . ?
C141 C140 C139 117.8(9) . . ?
C141 C140 H140 121.1 . . ?
C139 C140 H140 121.1 . . ?
C140 C141 C136 121.5(8) . . ?
C140 C141 H141 119.2 . . ?
C136 C141 H141 119.2 . . ?
F153 P150 F154 89.4(6) . . ?
F153 P150 F151 89.9(7) . . ?
F154 P150 F151 179.3(7) . . ?
F153 P150 F156 175.2(7) . . ?
F154 P150 F156 95.4(7) . . ?
F151 P150 F156 85.3(4) . . ?
F153 P150 F152 90.8(4) . . ?
F154 P150 F152 89.5(3) . . ?
F151 P150 F152 90.4(3) . . ?
F156 P150 F152 88.8(4) . . ?
F153 P150 F155 92.9(4) . . ?
F154 P150 F155 89.6(4) . . ?
F151 P150 F155 90.5(3) . . ?
F156 P150 F155 87.5(4) . . ?
F152 P150 F155 176.1(4) . . ?
Cl14 C160 Cl15 110.8(6) . . ?
Cl14 C160 H16A 109.5 . . ?
Cl15 C160 H16A 109.5 . . ?
Cl14 C160 H16B 109.5 . . ?
Cl15 C160 H16B 109.5 . . ?
H16A C160 H16B 108.1 . . ?
Cl17 C161 Cl16 114.0(7) . . ?
Cl17 C161 H16C 108.8 . . ?
Cl16 C161 H16C 108.8 . . ?
Cl17 C161 H16D 108.8 . . ?
Cl16 C161 H16D 108.8 . . ?
H16C C161 H16D 107.7 . . ?
Cl18 C162 Cl19 106.7(13) . . ?
Cl18 C162 H16E 110.4 . . ?
Cl19 C162 H16E 110.4 . . ?
Cl18 C162 H16F 110.4 . . ?
Cl19 C162 H16F 110.4 . . ?
H16E C162 H16F 108.6 . . ?
 
loop_
 _geom_torsion_atom_site_label_1
 _geom_torsion_atom_site_label_2
 _geom_torsion_atom_site_label_3
 _geom_torsion_atom_site_label_4
 _geom_torsion
 _geom_torsion_site_symmetry_1
 _geom_torsion_site_symmetry_2
 _geom_torsion_site_symmetry_3
 _geom_torsion_site_symmetry_4
 _geom_torsion_publ_flag
C16 N11 C12 C13 -3.1(13) . . . . ?
Re1 N11 C12 C13 176.6(7) . . . . ?
N11 C12 C13 C14 -0.3(16) . . . . ?
C12 C13 C14 C15 1.0(14) . . . . ?
C12 C13 C14 C17 -178.4(10) . . . . ?
C13 C14 C15 C16 1.6(12) . . . . ?
C17 C14 C15 C16 -179.0(8) . . . . ?
C12 N11 C16 C15 5.7(10) . . . . ?
Re1 N11 C16 C15 -174.1(5) . . . . ?
C12 N11 C16 C22 -174.6(7) . . . . ?
Re1 N11 C16 C22 5.6(8) . . . . ?
C14 C15 C16 N11 -5.1(11) . . . . ?
C14 C15 C16 C22 175.2(7) . . . . ?
C13 C14 C17 C19 111.8(11) . . . . ?
C15 C14 C17 C19 -67.5(11) . . . . ?
C13 C14 C17 C20 -126.7(10) . . . . ?
C15 C14 C17 C20 54.0(12) . . . . ?
C13 C14 C17 C18 -7.1(16) . . . . ?
C15 C14 C17 C18 173.6(10) . . . . ?
C26 N21 C22 C23 -2.6(9) . . . . ?
Re1 N21 C22 C23 -174.0(5) . . . . ?
C26 N21 C22 C16 175.7(6) . . . . ?
Re1 N21 C22 C16 4.3(7) . . . . ?
N11 C16 C22 N21 -6.5(8) . . . . ?
C15 C16 C22 N21 173.2(6) . . . . ?
N11 C16 C22 C23 171.7(6) . . . . ?
C15 C16 C22 C23 -8.6(10) . . . . ?
N21 C22 C23 C24 3.5(10) . . . . ?
C16 C22 C23 C24 -174.6(6) . . . . ?
C22 C23 C24 C25 -2.3(10) . . . . ?
C22 C23 C24 C27 177.4(6) . . . . ?
C23 C24 C25 C26 0.3(11) . . . . ?
C27 C24 C25 C26 -179.4(7) . . . . ?
C22 N21 C26 C25 0.5(11) . . . . ?
Re1 N21 C26 C25 171.1(6) . . . . ?
C24 C25 C26 N21 0.6(13) . . . . ?
C25 C24 C27 C29 129.2(8) . . . . ?
C23 C24 C27 C29 -50.5(10) . . . . ?
C25 C24 C27 C28 -111.5(8) . . . . ?
C23 C24 C27 C28 68.8(8) . . . . ?
C25 C24 C27 C30 7.0(11) . . . . ?
C23 C24 C27 C30 -172.7(7) . . . . ?
C46 N41 C42 C43 -0.7(10) . . . . ?
Re2 N41 C42 C43 176.6(5) . . . . ?
C46 N41 C42 C52 -179.1(6) . . . . ?
Re2 N41 C42 C52 -1.8(7) . . . . ?
N41 C42 C43 C44 0.2(11) . . . . ?
C52 C42 C43 C44 178.4(6) . . . . ?
C42 C43 C44 C45 1.9(10) . . . . ?
C42 C43 C44 C47 -179.5(7) . . . . ?
C43 C44 C45 C46 -3.7(12) . . . . ?
C47 C44 C45 C46 177.7(7) . . . . ?
C42 N41 C46 C45 -1.1(11) . . . . ?
Re2 N41 C46 C45 -178.1(6) . . . . ?
C44 C45 C46 N41 3.4(12) . . . . ?
C43 C44 C47 C50 -112.9(11) . . . . ?
C45 C44 C47 C50 65.6(12) . . . . ?
C43 C44 C47 C49 14.2(12) . . . . ?
C45 C44 C47 C49 -167.3(9) . . . . ?
C43 C44 C47 C48 129.1(9) . . . . ?
C45 C44 C47 C48 -52.4(11) . . . . ?
C56 N51 C52 C53 -1.4(10) . . . . ?
Re2 N51 C52 C53 175.3(5) . . . . ?
C56 N51 C52 C42 179.4(6) . . . . ?
Re2 N51 C52 C42 -3.9(7) . . . . ?
N41 C42 C52 N51 3.7(9) . . . . ?
C43 C42 C52 N51 -174.7(6) . . . . ?
N41 C42 C52 C53 -175.5(6) . . . . ?
C43 C42 C52 C53 6.2(11) . . . . ?
N51 C52 C53 C54 1.7(11) . . . . ?
C42 C52 C53 C54 -179.2(6) . . . . ?
C52 C53 C54 C55 -1.0(10) . . . . ?
C52 C53 C54 C57 -178.6(7) . . . . ?
C53 C54 C55 C56 0.2(11) . . . . ?
C57 C54 C55 C56 177.8(7) . . . . ?
C54 C55 C56 N51 0.0(12) . . . . ?
C52 N51 C56 C55 0.6(10) . . . . ?
Re2 N51 C56 C55 -175.8(6) . . . . ?
C53 C54 C57 C59 89.9(10) . . . . ?
C55 C54 C57 C59 -87.6(9) . . . . ?
C53 C54 C57 C60 -151.5(11) . . . . ?
C55 C54 C57 C60 31.1(14) . . . . ?
C53 C54 C57 C58 -28.8(11) . . . . ?
C55 C54 C57 C58 153.7(8) . . . . ?
C70 P7 C67 P6 -177.9(4) . . . . ?
C76 P7 C67 P6 -72.8(4) . . . . ?
Cu3 P7 C67 P6 51.7(4) . . . . ?
C82 P6 C67 P7 92.7(4) . . . . ?
C88 P6 C67 P7 -157.4(4) . . . . ?
Cu5 P6 C67 P7 -40.6(4) . . . . ?
C100 P8 C68 P9 86.9(4) . . . . ?
C94 P8 C68 P9 -163.1(4) . . . . ?
Cu3 P8 C68 P9 -37.8(4) . . . . ?
C112 P9 C68 P8 163.4(3) . . . . ?
C106 P9 C68 P8 -87.7(4) . . . . ?
Cu4 P9 C68 P8 43.8(4) . . . . ?
C130 P11 C69 P10 178.1(3) . . . . ?
C136 P11 C69 P10 72.3(4) . . . . ?
Cu5 P11 C69 P10 -50.9(3) . . . . ?
C118 P10 C69 P11 -89.6(4) . . . . ?
C124 P10 C69 P11 163.9(3) . . . . ?
Cu4 P10 C69 P11 43.2(4) . . . . ?
C76 P7 C70 C75 41.2(8) . . . . ?
C67 P7 C70 C75 149.6(8) . . . . ?
Cu3 P7 C70 C75 -89.1(8) . . . . ?
C76 P7 C70 C71 -141.5(7) . . . . ?
C67 P7 C70 C71 -33.1(8) . . . . ?
Cu3 P7 C70 C71 88.2(7) . . . . ?
C75 C70 C71 C72 2.7(14) . . . . ?
P7 C70 C71 C72 -174.7(7) . . . . ?
C70 C71 C72 C73 -0.4(16) . . . . ?
C71 C72 C73 C74 -2.2(19) . . . . ?
C72 C73 C74 C75 2(2) . . . . ?
C71 C70 C75 C74 -2.3(16) . . . . ?
P7 C70 C75 C74 175.1(9) . . . . ?
C73 C74 C75 C70 0(2) . . . . ?
C70 P7 C76 C81 69.0(7) . . . . ?
C67 P7 C76 C81 -37.8(7) . . . . ?
Cu3 P7 C76 C81 -157.0(6) . . . . ?
C70 P7 C76 C77 -108.8(6) . . . . ?
C67 P7 C76 C77 144.4(6) . . . . ?
Cu3 P7 C76 C77 25.2(7) . . . . ?
C81 C76 C77 C78 0.6(13) . . . . ?
P7 C76 C77 C78 178.5(8) . . . . ?
C76 C77 C78 C79 1.2(15) . . . . ?
C77 C78 C79 C80 -1.9(17) . . . . ?
C78 C79 C80 C81 1.0(17) . . . . ?
C79 C80 C81 C76 0.9(15) . . . . ?
C77 C76 C81 C80 -1.6(13) . . . . ?
P7 C76 C81 C80 -179.5(8) . . . . ?
C88 P6 C82 C87 128.5(7) . . . . ?
C67 P6 C82 C87 -123.0(7) . . . . ?
Cu5 P6 C82 C87 5.8(8) . . . . ?
C88 P6 C82 C83 -51.1(7) . . . . ?
C67 P6 C82 C83 57.3(7) . . . . ?
Cu5 P6 C82 C83 -173.8(5) . . . . ?
C87 C82 C83 C84 0.8(13) . . . . ?
P6 C82 C83 C84 -179.5(7) . . . . ?
C82 C83 C84 C85 -1.6(15) . . . . ?
C83 C84 C85 C86 0.9(18) . . . . ?
C84 C85 C86 C87 1(2) . . . . ?
C85 C86 C87 C82 -1.4(18) . . . . ?
C83 C82 C87 C86 0.7(15) . . . . ?
P6 C82 C87 C86 -179.0(9) . . . . ?
C82 P6 C88 C89 162.0(6) . . . . ?
C67 P6 C88 C89 53.8(6) . . . . ?
Cu5 P6 C88 C89 -67.1(6) . . . . ?
C82 P6 C88 C93 -30.7(6) . . . . ?
C67 P6 C88 C93 -138.9(6) . . . . ?
Cu5 P6 C88 C93 100.2(5) . . . . ?
C93 C88 C89 C90 1.0(10) . . . . ?
P6 C88 C89 C90 168.5(6) . . . . ?
C88 C89 C90 C91 -2.1(11) . . . . ?
C89 C90 C91 C92 2.5(13) . . . . ?
C90 C91 C92 C93 -1.8(14) . . . . ?
C91 C92 C93 C88 0.7(12) . . . . ?
C89 C88 C93 C92 -0.3(10) . . . . ?
P6 C88 C93 C92 -167.7(6) . . . . ?
C100 P8 C94 C95 -153.4(6) . . . . ?
C68 P8 C94 C95 97.0(6) . . . . ?
Cu3 P8 C94 C95 -25.9(7) . . . . ?
C100 P8 C94 C99 30.3(7) . . . . ?
C68 P8 C94 C99 -79.3(7) . . . . ?
Cu3 P8 C94 C99 157.8(6) . . . . ?
C99 C94 C95 C96 -1.7(12) . . . . ?
P8 C94 C95 C96 -178.2(6) . . . . ?
C94 C95 C96 C97 -0.5(13) . . . . ?
C95 C96 C97 C98 3.2(14) . . . . ?
C96 C97 C98 C99 -3.6(14) . . . . ?
C95 C94 C99 C98 1.4(12) . . . . ?
P8 C94 C99 C98 177.7(7) . . . . ?
C97 C98 C99 C94 1.2(14) . . . . ?
C68 P8 C100 C101 -158.5(9) . . . . ?
C94 P8 C100 C101 96.1(9) . . . . ?
Cu3 P8 C100 C101 -33.7(10) . . . . ?
C68 P8 C100 C105 11.8(8) . . . . ?
C94 P8 C100 C105 -93.6(7) . . . . ?
Cu3 P8 C100 C105 136.6(6) . . . . ?
C105 C100 C101 C102 9(2) . . . . ?
P8 C100 C101 C102 -179.7(13) . . . . ?
C100 C101 C102 C103 -11(3) . . . . ?
C101 C102 C103 C104 8(3) . . . . ?
C102 C103 C104 C105 -5(2) . . . . ?
C103 C104 C105 C100 2.6(16) . . . . ?
C101 C100 C105 C104 -4.8(14) . . . . ?
P8 C100 C105 C104 -175.4(7) . . . . ?
C112 P9 C106 C111 -133.8(5) . . . . ?
C68 P9 C106 C111 119.2(5) . . . . ?
Cu4 P9 C106 C111 -4.5(6) . . . . ?
C112 P9 C106 C107 44.2(6) . . . . ?
C68 P9 C106 C107 -62.8(6) . . . . ?
Cu4 P9 C106 C107 173.5(4) . . . . ?
C111 C106 C107 C108 -0.8(10) . . . . ?
P9 C106 C107 C108 -178.8(5) . . . . ?
C106 C107 C108 C109 -0.5(11) . . . . ?
C107 C108 C109 C110 2.1(12) . . . . ?
C108 C109 C110 C111 -2.2(11) . . . . ?
C107 C106 C111 C110 0.6(10) . . . . ?
P9 C106 C111 C110 178.7(5) . . . . ?
C109 C110 C111 C106 0.9(10) . . . . ?
C106 P9 C112 C117 -163.3(6) . . . . ?
C68 P9 C112 C117 -54.8(6) . . . . ?
Cu4 P9 C112 C117 62.3(6) . . . . ?
C106 P9 C112 C113 20.5(7) . . . . ?
C68 P9 C112 C113 129.1(6) . . . . ?
Cu4 P9 C112 C113 -113.9(5) . . . . ?
C117 C112 C113 C114 2.0(10) . . . . ?
P9 C112 C113 C114 178.2(6) . . . . ?
C112 C113 C114 C115 -3.2(12) . . . . ?
C113 C114 C115 C116 0.9(12) . . . . ?
C114 C115 C116 C117 2.3(12) . . . . ?
C113 C112 C117 C116 1.3(10) . . . . ?
P9 C112 C117 C116 -175.0(6) . . . . ?
C115 C116 C117 C112 -3.5(11) . . . . ?
C124 P10 C118 C119 -135.7(7) . . . . ?
C69 P10 C118 C119 114.1(7) . . . . ?
Cu4 P10 C118 C119 -11.5(8) . . . . ?
C124 P10 C118 C123 47.6(7) . . . . ?
C69 P10 C118 C123 -62.6(6) . . . . ?
Cu4 P10 C118 C123 171.8(5) . . . . ?
C123 C118 C119 C120 -3.2(12) . . . . ?
P10 C118 C119 C120 -180.0(6) . . . . ?
C118 C119 C120 C121 4.0(13) . . . . ?
C119 C120 C121 C122 -4.1(15) . . . . ?
C120 C121 C122 C123 3.5(16) . . . . ?
C121 C122 C123 C118 -2.6(14) . . . . ?
C119 C118 C123 C122 2.6(12) . . . . ?
P10 C118 C123 C122 179.3(6) . . . . ?
C118 P10 C124 C129 -144.1(7) . . . . ?
C69 P10 C124 C129 -37.2(8) . . . . ?
Cu4 P10 C124 C129 83.9(7) . . . . ?
C118 P10 C124 C125 45.6(6) . . . . ?
C69 P10 C124 C125 152.5(5) . . . . ?
Cu4 P10 C124 C125 -86.4(5) . . . . ?
C129 C124 C125 C126 3.8(12) . . . . ?
P10 C124 C125 C126 174.5(6) . . . . ?
C124 C125 C126 C127 -2.6(13) . . . . ?
C125 C126 C127 C128 3.1(15) . . . . ?
C126 C127 C128 C129 -4.7(17) . . . . ?
C125 C124 C129 C128 -5.4(13) . . . . ?
P10 C124 C129 C128 -175.3(7) . . . . ?
C127 C128 C129 C124 5.8(16) . . . . ?
C69 P11 C130 C131 34.9(9) . . . . ?
C136 P11 C130 C131 143.9(8) . . . . ?
Cu5 P11 C130 C131 -87.7(8) . . . . ?
C69 P11 C130 C135 -149.9(6) . . . . ?
C136 P11 C130 C135 -40.9(7) . . . . ?
Cu5 P11 C130 C135 87.5(7) . . . . ?
C135 C130 C131 C132 1.7(17) . . . . ?
P11 C130 C131 C132 177.0(10) . . . . ?
C130 C131 C132 C133 1(2) . . . . ?
C131 C132 C133 C134 -4(2) . . . . ?
C132 C133 C134 C135 6(2) . . . . ?
C131 C130 C135 C134 -0.3(14) . . . . ?
P11 C130 C135 C134 -175.7(8) . . . . ?
C133 C134 C135 C130 -3.2(17) . . . . ?
C130 P11 C136 C137 -60.5(7) . . . . ?
C69 P11 C136 C137 47.0(7) . . . . ?
Cu5 P11 C136 C137 166.5(5) . . . . ?
C130 P11 C136 C141 118.7(6) . . . . ?
C69 P11 C136 C141 -133.8(6) . . . . ?
Cu5 P11 C136 C141 -14.4(7) . . . . ?
C141 C136 C137 C138 0.1(12) . . . . ?
P11 C136 C137 C138 179.3(6) . . . . ?
C136 C137 C138 C139 -0.8(14) . . . . ?
C137 C138 C139 C140 0.9(16) . . . . ?
C138 C139 C140 C141 -0.3(16) . . . . ?
C139 C140 C141 C136 -0.4(15) . . . . ?
C137 C136 C141 C140 0.5(13) . . . . ?
P11 C136 C141 C140 -178.7(7) . . . . ?
 
_refine_diff_density_max    2.256
_refine_diff_density_min   -1.380
_refine_diff_density_rms    0.131

_shelxl_version_number 2013-4

# SQUEEZE RESULTS
# Note: Data are Listed for all Voids in the P1 Unit Cell
# i.e. Centre of Gravity, Solvent Accessible Volume,
# Recovered number of Electrons in the Void and
# Details about the Squeezed Material
loop_
  _platon_squeeze_void_nr
  _platon_squeeze_void_average_x
  _platon_squeeze_void_average_y
  _platon_squeeze_void_average_z
  _platon_squeeze_void_volume
  _platon_squeeze_void_count_electrons
  _platon_squeeze_void_content
   1 -0.021  0.000  0.500       563        84 ' '
   2  0.270  0.338  0.745        26         3 ' '
   3  0.413  0.333  0.572        25         3 ' '
   4  0.587  0.667  0.428        25         3 ' '
   5  0.730  0.662  0.255        26         3 ' '
_platon_squeeze_details                           ?

_shelx_res_file
;
REM P-1 (#2 in standard setting)
REM  NZ1366 in P-1
REM R1 =  0.0806 for   16642 Fo > 4sig(Fo)  and  0.1426 for all   28214 data
REM   1444 parameters refined using      2 restraints
REM Highest difference peak  2.632,  deepest hole -1.391,  1-sigma level  0.178
REM  NZ1366 in P-1
REM R1 =  0.0806 for   16642 Fo > 4sig(Fo)  and  0.1426 for all   28214 data
REM   1454 parameters refined using      2 restraints
REM Highest difference peak  2.635,  deepest hole -1.396,  1-sigma level  0.178
REM  NZ1366 in P-1
REM R1 =  0.0741 for   16642 Fo > 4sig(Fo)  and  0.1361 for all   28214 data
REM   1445 parameters refined using      2 restraints
REM Highest difference peak  1.980,  deepest hole -1.387,  1-sigma level  0.163
REM  NZ1366 in P-1
REM R1 =  0.0680 for   16798 Fo > 4sig(Fo)  and  0.1190 for all   28214 data
REM   1448 parameters refined using      2 restraints
REM Highest difference peak  2.235,  deepest hole -1.373,  1-sigma level  0.131
REM  NZ1366 in P-1
REM R1 =  0.0679 for   16798 Fo > 4sig(Fo)  and  0.1189 for all   28214 data
REM   1460 parameters refined using      5 restraints
REM Highest difference peak  2.234,  deepest hole -1.379,  1-sigma level  0.131
REM  NZ1366 in P-1
REM R1 =  0.0678 for   16798 Fo > 4sig(Fo)  and  0.1188 for all   28214 data
REM   1460 parameters refined using     21 restraints
REM Highest difference peak  2.256,  deepest hole -1.380,  1-sigma level  0.131
TITL NZ1366 in P-1
CELL 0.71073 15.2538 17.7777 25.8862 89.730 72.967 82.322
ZERR 2.0000 0.0004 0.0007 0.0009 0.003 0.003 0.003
LATT 1
SFAC C H N O F P CU RE CL
UNIT 254.5 237 8 12 12 14 6 4 9
MERG 2
FMAP 2
GRID
PLAN 20
TEMP -123
SIZE 0.35 0.13 0.07
ISOR C162 CL18 CL19
BOND $H
CONF
L.S. 20
ACTA 54
WGHT    0.086200
FVAR      16.84196   0.00000
RE1   8    0.819848    0.863225    0.372487    11.00000    0.06898    0.04350 =
         0.04232   -0.00113   -0.00974    0.00814
RE2   8    1.271920    0.091199    0.216691    11.00000    0.06003    0.03203 =
         0.05935    0.00082   -0.02568   -0.00116
CU3   7    1.179133    0.527388    0.270622    11.00000    0.03988    0.03397 =
         0.02773   -0.00105   -0.01331   -0.00610
CU4   7    1.084309    0.502769    0.205209    11.00000    0.03672    0.03385 =
         0.02453    0.00158   -0.01074   -0.00630
CU5   7    1.033255    0.447481    0.298783    11.00000    0.04317    0.04063 =
         0.02257   -0.00041   -0.00975   -0.01044
C1    1    0.887117    0.754757    0.345706    11.00000    0.06397    0.04061 =
         0.04254    0.00595   -0.01976   -0.00243
C2    1    0.925806    0.691844    0.322480    11.00000    0.04963    0.05225 =
         0.03589    0.01123   -0.01026   -0.00823
C3    1    0.972326    0.622236    0.299657    11.00000    0.04874    0.04871 =
         0.02767    0.00237   -0.00696   -0.00102
C4    1    1.011606    0.562084    0.279915    11.00000    0.03719    0.04724 =
         0.02801   -0.00020   -0.00994   -0.00688
C5    1    1.178608    0.425635    0.235072    11.00000    0.03615    0.03538 =
         0.02866   -0.00373   -0.00889   -0.00307
C6    1    1.200091    0.357357    0.232598    11.00000    0.03164    0.03379 =
         0.02281    0.00028   -0.00809   -0.00335
P6    6    1.027508    0.446074    0.386319    11.00000    0.05008    0.04551 =
         0.01996   -0.00198   -0.00906   -0.01064
C7    1    1.223705    0.279471    0.230196    11.00000    0.03595    0.04123 =
         0.02635   -0.00256   -0.00691   -0.00565
P7    6    1.210054    0.508140    0.351886    11.00000    0.04373    0.04494 =
         0.02827   -0.00381   -0.01258   -0.00574
C8    1    1.242887    0.211035    0.228029    11.00000    0.05463    0.03026 =
         0.04353    0.00136   -0.01565   -0.00357
P8    6    1.222756    0.636160    0.231675    11.00000    0.03673    0.03442 =
         0.03773   -0.00002   -0.01401   -0.00785
P9    6    1.129896    0.596963    0.148519    11.00000    0.03600    0.03341 =
         0.02823    0.00087   -0.00950   -0.00546
P10   6    1.021675    0.420272    0.164251    11.00000    0.03781    0.04790 =
         0.02802   -0.00043   -0.01194   -0.01143
P11   6    0.942484    0.369694    0.275870    11.00000    0.03848    0.04335 =
         0.03116    0.00067   -0.00892   -0.01116
N11   3    0.736434    0.843607    0.319758    11.00000    0.03790    0.04638 =
         0.04084    0.00698    0.01033    0.00182
C12   1    0.656034    0.816003    0.336662    11.00000    0.06061    0.08448 =
         0.06591    0.00474    0.01223   -0.01137
AFIX  43
H12   2    0.635242    0.801586    0.373152    11.00000   -1.20000
AFIX   0
C13   1    0.602395    0.807633    0.303607    11.00000    0.06220    0.11590 =
         0.06345   -0.00302    0.00909   -0.03670
AFIX  43
H13   2    0.545835    0.787465    0.317609    11.00000   -1.20000
AFIX   0
C14   1    0.628898    0.828014    0.249963    11.00000    0.02709    0.08660 =
         0.06742   -0.00879   -0.00277   -0.01440
C15   1    0.714246    0.856048    0.233120    11.00000    0.04297    0.04221 =
         0.05546    0.00156   -0.00764    0.00123
AFIX  43
H15   2    0.735918    0.872312    0.197151    11.00000   -1.20000
AFIX   0
C16   1    0.767488    0.860496    0.267805    11.00000    0.03811    0.03699 =
         0.05150    0.00690   -0.00272   -0.00011
C17   1    0.573743    0.822904    0.210633    11.00000    0.03288    0.12930 =
         0.08932   -0.00594   -0.01066   -0.02044
C18   1    0.488409    0.782686    0.234618    11.00000    0.08002    0.36681 =
         0.13676   -0.02351   -0.01484   -0.12811
AFIX  33
H18A  2    0.453381    0.781865    0.208412    11.00000   -1.50000
H18B  2    0.449037    0.810051    0.267845    11.00000   -1.50000
H18C  2    0.508396    0.730497    0.242891    11.00000   -1.50000
AFIX   0
C19   1    0.541297    0.902668    0.198129    11.00000    0.08628    0.11090 =
         0.14626   -0.04860   -0.06764    0.04205
AFIX  33
H19A  2    0.504859    0.901211    0.172720    11.00000   -1.50000
H19B  2    0.595021    0.928735    0.181938    11.00000   -1.50000
H19C  2    0.502872    0.930028    0.231580    11.00000   -1.50000
AFIX   0
C20   1    0.633822    0.777814    0.159616    11.00000    0.06312    0.07050 =
         0.08730   -0.00570   -0.03967   -0.00492
AFIX  33
H20A  2    0.598180    0.775898    0.133822    11.00000   -1.50000
H20B  2    0.653218    0.726064    0.169010    11.00000   -1.50000
H20C  2    0.688628    0.802541    0.143270    11.00000   -1.50000
AFIX   0
N21   3    0.898747    0.892988    0.292394    11.00000    0.04681    0.03241 =
         0.04766   -0.00270   -0.01618    0.00361
C22   1    0.860944    0.884090    0.251095    11.00000    0.04080    0.02488 =
         0.04110   -0.00124   -0.00791    0.00259
C23   1    0.909032    0.894646    0.198247    11.00000    0.03876    0.04161 =
         0.04543    0.00069   -0.01872   -0.00510
AFIX  43
H23   2    0.879999    0.890951    0.170693    11.00000   -1.20000
AFIX   0
C24   1    1.000165    0.910758    0.184556    11.00000    0.04078    0.03944 =
         0.05295    0.00408   -0.00514   -0.00933
C25   1    1.035437    0.917825    0.228160    11.00000    0.04357    0.05436 =
         0.05332    0.00890   -0.02213   -0.01857
AFIX  43
H25   2    1.096886    0.928994    0.221506    11.00000   -1.20000
AFIX   0
C26   1    0.984642    0.909219    0.279071    11.00000    0.04824    0.07018 =
         0.05952    0.00216   -0.02539   -0.01042
AFIX  43
H26   2    1.011744    0.915088    0.307243    11.00000   -1.20000
AFIX   0
C27   1    1.054644    0.919104    0.124758    11.00000    0.05525    0.05739 =
         0.05520    0.00908   -0.02398   -0.02096
C28   1    1.009333    0.992009    0.106225    11.00000    0.05547    0.08216 =
         0.07839    0.03140   -0.03068   -0.02207
AFIX  33
H28A  2    1.013786    1.035395    0.128086    11.00000   -1.50000
H28B  2    0.944041    0.988285    0.110622    11.00000   -1.50000
H28C  2    1.041124    0.999087    0.068085    11.00000   -1.50000
AFIX   0
C29   1    1.049324    0.853095    0.091267    11.00000    0.07651    0.08743 =
         0.05138   -0.00252    0.00762   -0.03241
AFIX  33
H29A  2    1.083514    0.859520    0.053420    11.00000   -1.50000
H29B  2    0.984402    0.849939    0.094197    11.00000   -1.50000
H29C  2    1.076550    0.806325    0.104113    11.00000   -1.50000
AFIX   0
C30   1    1.157251    0.926489    0.117932    11.00000    0.04109    0.09204 =
         0.07649    0.02007   -0.01371   -0.01677
AFIX  33
H30A  2    1.160722    0.969937    0.140060    11.00000   -1.50000
H30B  2    1.188802    0.934215    0.079857    11.00000   -1.50000
H30C  2    1.187262    0.879997    0.129551    11.00000   -1.50000
AFIX   0
C31   1    0.752542    0.965633    0.390185    11.00000    0.07831    0.04795 =
         0.05015    0.00549   -0.00105   -0.00498
O32   4    0.710405    1.024490    0.402287    11.00000    0.10902    0.05469 =
         0.10934   -0.00192   -0.01256    0.02569
C33   1    0.745139    0.825787    0.437075    11.00000    0.08669    0.07467 =
         0.04783    0.01364    0.00222    0.02021
O34   4    0.699225    0.800730    0.475028    11.00000    0.13071    0.11112 =
         0.05437    0.02235    0.00907    0.00512
C35   1    0.902042    0.887369    0.411001    11.00000    0.09968    0.05599 =
         0.04824   -0.00929   -0.03020    0.00973
O36   4    0.950969    0.906467    0.432872    11.00000    0.13888    0.10426 =
         0.06645   -0.02856   -0.05375    0.02151
N41   3    1.406641    0.100004    0.226158    11.00000    0.06129    0.03106 =
         0.05115    0.00167   -0.02066   -0.00007
C42   1    1.475780    0.114039    0.182477    11.00000    0.06645    0.02684 =
         0.05411   -0.00811   -0.02555    0.00629
C43   1    1.563717    0.124699    0.184569    11.00000    0.05519    0.03608 =
         0.06199   -0.00146   -0.02392   -0.00378
AFIX  43
H43   2    1.609791    0.134589    0.152542    11.00000   -1.20000
AFIX   0
C44   1    1.583445    0.120838    0.233144    11.00000    0.05819    0.03785 =
         0.05416   -0.00651   -0.02137    0.00299
C45   1    1.513382    0.103889    0.277392    11.00000    0.07420    0.06307 =
         0.05408    0.00431   -0.03659    0.00324
AFIX  43
H45   2    1.525415    0.097701    0.311262    11.00000   -1.20000
AFIX   0
C46   1    1.426485    0.095653    0.273992    11.00000    0.07796    0.05652 =
         0.04567    0.01005   -0.02673   -0.01091
AFIX  43
H46   2    1.379487    0.086734    0.305867    11.00000   -1.20000
AFIX   0
C47   1    1.678579    0.132654    0.238504    11.00000    0.06061    0.06318 =
         0.06760   -0.00432   -0.02090   -0.00748
C48   1    1.666090    0.191303    0.284009    11.00000    0.10436    0.11869 =
         0.14079   -0.03506   -0.05319   -0.02323
AFIX  33
H48A  2    1.637192    0.240248    0.275066    11.00000   -1.50000
H48B  2    1.726636    0.196979    0.288290    11.00000   -1.50000
H48C  2    1.626437    0.174272    0.317835    11.00000   -1.50000
AFIX   0
C49   1    1.738574    0.167179    0.189695    11.00000    0.11577    0.19322 =
         0.14883    0.05022   -0.05207   -0.07431
AFIX  33
H49A  2    1.705550    0.215417    0.182588    11.00000   -1.50000
H49B  2    1.752936    0.132275    0.158228    11.00000   -1.50000
H49C  2    1.796208    0.176271    0.196562    11.00000   -1.50000
AFIX   0
C50   1    1.722817    0.061897    0.252521    11.00000    0.11451    0.07937 =
         0.41760    0.05232   -0.17466   -0.01934
AFIX  33
H50A  2    1.681103    0.042606    0.284668    11.00000   -1.50000
H50B  2    1.780140    0.070259    0.260089    11.00000   -1.50000
H50C  2    1.737257    0.024763    0.222326    11.00000   -1.50000
AFIX   0
N51   3    1.358042    0.113743    0.137287    11.00000    0.05141    0.02730 =
         0.05061   -0.00748   -0.02304    0.00898
C52   1    1.447873    0.119231    0.131557    11.00000    0.05347    0.02909 =
         0.05407   -0.00567   -0.02065    0.00917
C53   1    1.508860    0.127972    0.082075    11.00000    0.05625    0.04114 =
         0.05196   -0.00866   -0.01351    0.00837
AFIX  43
H53   2    1.571938    0.130283    0.079285    11.00000   -1.20000
AFIX   0
C54   1    1.479810    0.133608    0.035183    11.00000    0.07877    0.03679 =
         0.04841   -0.00644   -0.01780    0.01979
C55   1    1.384941    0.128318    0.043122    11.00000    0.07614    0.04951 =
         0.05148   -0.01845   -0.02820    0.02134
AFIX  43
H55   2    1.360570    0.131489    0.013233    11.00000   -1.20000
AFIX   0
C56   1    1.330127    0.118928    0.092353    11.00000    0.06955    0.04059 =
         0.04825   -0.00580   -0.02608    0.00589
AFIX  43
H56   2    1.266886    0.115631    0.096224    11.00000   -1.20000
AFIX   0
C57   1    1.544706    0.141491   -0.019816    11.00000    0.07434    0.05982 =
         0.04886    0.00071   -0.00846    0.01338
C58   1    1.625448    0.181391   -0.016696    11.00000    0.18430    0.08392 =
         0.06200   -0.00224    0.00690   -0.06013
AFIX  33
H58A  2    1.658602    0.152708    0.005923    11.00000   -1.50000
H58B  2    1.601980    0.232771   -0.000878    11.00000   -1.50000
H58C  2    1.667725    0.184374   -0.053127    11.00000   -1.50000
AFIX   0
C59   1    1.583513    0.063327   -0.045120    11.00000    0.08279    0.10063 =
         0.08050   -0.04256    0.00089   -0.01363
AFIX  33
H59A  2    1.616244    0.034505   -0.022352    11.00000   -1.50000
H59B  2    1.626674    0.067749   -0.081084    11.00000   -1.50000
H59C  2    1.532852    0.036908   -0.048377    11.00000   -1.50000
AFIX   0
C60   1    1.495329    0.184133   -0.056271    11.00000    0.12341    0.34866 =
         0.10321    0.12062    0.01776    0.10599
AFIX  33
H60A  2    1.539818    0.189383   -0.091660    11.00000   -1.50000
H60B  2    1.467379    0.234626   -0.040040    11.00000   -1.50000
H60C  2    1.446809    0.156008   -0.060721    11.00000   -1.50000
AFIX   0
C61   1    1.301384   -0.018072    0.197622    11.00000    0.04963    0.05586 =
         0.07594    0.00866   -0.03360   -0.00288
O62   4    1.316343   -0.081480    0.186150    11.00000    0.07351    0.02657 =
         0.12345   -0.00355   -0.04874    0.00279
C63   1    1.208949    0.067924    0.290066    11.00000    0.06780    0.03792 =
         0.07633   -0.00158   -0.03167   -0.00419
O64   4    1.176022    0.052062    0.333427    11.00000    0.12114    0.06456 =
         0.06287    0.01738   -0.01635   -0.01372
C65   1    1.156774    0.094911    0.200485    11.00000    0.07949    0.03035 =
         0.07433   -0.00571   -0.01179   -0.00831
O66   4    1.087392    0.103147    0.191224    11.00000    0.07145    0.06324 =
         0.11831   -0.01228   -0.04581    0.00365
C67   1    1.099420    0.511322    0.404926    11.00000    0.05147    0.05255 =
         0.02998   -0.00259   -0.01454   -0.01474
AFIX  23
H67A  2    1.066149    0.563775    0.409861    11.00000   -1.20000
H67B  2    1.110779    0.496326    0.439536    11.00000   -1.20000
AFIX   0
C68   1    1.155829    0.674036    0.186574    11.00000    0.03931    0.03867 =
         0.03445    0.00170   -0.01372   -0.00923
AFIX  23
H68A  2    1.191435    0.708307    0.160936    11.00000   -1.20000
H68B  2    1.097186    0.704059    0.208186    11.00000   -1.20000
AFIX   0
C69   1    0.995465    0.336921    0.205456    11.00000    0.03792    0.05423 =
         0.03596   -0.00701   -0.01759   -0.00638
AFIX  23
H69A  2    0.952484    0.309651    0.192962    11.00000   -1.20000
H69B  2    1.053052    0.301633    0.201962    11.00000   -1.20000
AFIX   0
C70   1    1.270660    0.572288    0.378968    11.00000    0.05984    0.06251 =
         0.03597   -0.00588   -0.02446   -0.01271
C71   1    1.225364    0.636993    0.411705    11.00000    0.08536    0.06324 =
         0.07355   -0.01030   -0.03415   -0.01458
AFIX  43
H71   2    1.159619    0.645875    0.422877    11.00000   -1.20000
AFIX   0
C72   1    1.272373    0.687107    0.427851    11.00000    0.11695    0.06144 =
         0.10420   -0.01594   -0.05443   -0.02740
AFIX  43
H72   2    1.238935    0.730316    0.449792    11.00000   -1.20000
AFIX   0
C73   1    1.366401    0.676893    0.413325    11.00000    0.10889    0.11993 =
         0.09911   -0.01563   -0.04826   -0.05319
AFIX  43
H73   2    1.398389    0.713498    0.423957    11.00000   -1.20000
AFIX   0
C74   1    1.414937    0.612911    0.383017    11.00000    0.08632    0.14907 =
         0.16883   -0.06704   -0.03968   -0.04800
AFIX  43
H74   2    1.480581    0.604203    0.373806    11.00000   -1.20000
AFIX   0
C75   1    1.365799    0.559324    0.365367    11.00000    0.06060    0.13640 =
         0.10752   -0.05852   -0.02173   -0.02421
AFIX  43
H75   2    1.398912    0.515190    0.344415    11.00000   -1.20000
AFIX   0
C76   1    1.275826    0.416469    0.358127    11.00000    0.04941    0.04392 =
         0.03613    0.00035   -0.01864   -0.00304
C77   1    1.333543    0.376917    0.312024    11.00000    0.06440    0.08160 =
         0.03812   -0.00280   -0.02843    0.01593
AFIX  43
H77   2    1.336730    0.397773    0.277771    11.00000   -1.20000
AFIX   0
C78   1    1.386221    0.308759    0.314065    11.00000    0.09842    0.09510 =
         0.06233   -0.01423   -0.04397    0.04611
AFIX  43
H78   2    1.426145    0.283136    0.281946    11.00000   -1.20000
AFIX   0
C79   1    1.379728    0.278308    0.364062    11.00000    0.12400    0.06506 =
         0.07727   -0.00716   -0.05126    0.03497
AFIX  43
H79   2    1.414070    0.230411    0.366443    11.00000   -1.20000
AFIX   0
C80   1    1.322181    0.318145    0.411690    11.00000    0.10282    0.10392 =
         0.06448    0.01978   -0.03679    0.00628
AFIX  43
H80   2    1.318406    0.297623    0.446103    11.00000   -1.20000
AFIX   0
C81   1    1.272208    0.386266    0.407702    11.00000    0.06635    0.07385 =
         0.04022   -0.00057   -0.02188    0.01236
AFIX  43
H81   2    1.234186    0.413426    0.439682    11.00000   -1.20000
AFIX   0
C82   1    1.056421    0.358355    0.417653    11.00000    0.05781    0.05464 =
         0.03149    0.00434   -0.01383   -0.01117
C83   1    1.045606    0.353552    0.472856    11.00000    0.07459    0.06202 =
         0.02205   -0.00048   -0.01212   -0.01432
AFIX  43
H83   2    1.021585    0.397656    0.495823    11.00000   -1.20000
AFIX   0
C84   1    1.068991    0.286532    0.494314    11.00000    0.11526    0.07106 =
         0.04072    0.01785   -0.03247   -0.01405
AFIX  43
H84   2    1.062763    0.284376    0.531877    11.00000   -1.20000
AFIX   0
C85   1    1.101292    0.222588    0.462012    11.00000    0.18308    0.06517 =
         0.07677    0.03133   -0.05954   -0.00909
AFIX  43
H85   2    1.116728    0.175717    0.477175    11.00000   -1.20000
AFIX   0
C86   1    1.111755    0.225659    0.406934    11.00000    0.20484    0.06155 =
         0.05099   -0.01042   -0.05477    0.02242
AFIX  43
H86   2    1.133731    0.180951    0.384419    11.00000   -1.20000
AFIX   0
C87   1    1.090335    0.293063    0.385492    11.00000    0.13037    0.05836 =
         0.03397    0.00023   -0.03408    0.00893
AFIX  43
H87   2    1.098856    0.295282    0.347690    11.00000   -1.20000
AFIX   0
C88   1    0.910111    0.483689    0.425824    11.00000    0.04705    0.08156 =
         0.01652    0.00579   -0.00682   -0.01675
C89   1    0.876690    0.559453    0.422372    11.00000    0.05131    0.07614 =
         0.03122   -0.00784   -0.00045   -0.00012
AFIX  43
H89   2    0.918606    0.593066    0.404760    11.00000   -1.20000
AFIX   0
C90   1    0.784773    0.587032    0.443715    11.00000    0.06435    0.08484 =
         0.04419   -0.01369   -0.01455    0.00495
AFIX  43
H90   2    0.763792    0.639481    0.441928    11.00000   -1.20000
AFIX   0
C91   1    0.723133    0.538459    0.467705    11.00000    0.05276    0.12470 =
         0.05726   -0.01564   -0.00944    0.00291
AFIX  43
H91   2    0.659037    0.557130    0.481224    11.00000   -1.20000
AFIX   0
C92   1    0.753360    0.463015    0.472336    11.00000    0.06457    0.11605 =
         0.05076    0.01222   -0.00257   -0.02313
AFIX  43
H92   2    0.710486    0.430107    0.489921    11.00000   -1.20000
AFIX   0
C93   1    0.847194    0.434839    0.451147    11.00000    0.05964    0.08638 =
         0.03655    0.00155   -0.01330    0.00121
AFIX  43
H93   2    0.868179    0.382636    0.453939    11.00000   -1.20000
AFIX   0
C94   1    1.204960    0.719840    0.276765    11.00000    0.05699    0.04016 =
         0.04447    0.00226   -0.02839   -0.01624
C95   1    1.137645    0.723454    0.324252    11.00000    0.07305    0.05422 =
         0.05351   -0.01156   -0.01784   -0.00808
AFIX  43
H95   2    1.102939    0.682206    0.333343    11.00000   -1.20000
AFIX   0
C96   1    1.116938    0.785771    0.360710    11.00000    0.09962    0.07386 =
         0.04931   -0.00542   -0.01857   -0.00802
AFIX  43
H96   2    1.068890    0.787733    0.393942    11.00000   -1.20000
AFIX   0
C97   1    1.169243    0.844020    0.346281    11.00000    0.09780    0.05170 =
         0.07701   -0.01772   -0.04027    0.00504
AFIX  43
H97   2    1.159063    0.885915    0.370962    11.00000   -1.20000
AFIX   0
C98   1    1.234576    0.843350    0.298084    11.00000    0.08693    0.05917 =
         0.09432   -0.02907   -0.03502   -0.01317
AFIX  43
H98   2    1.267490    0.885485    0.288115    11.00000   -1.20000
AFIX   0
C99   1    1.253176    0.779979    0.263074    11.00000    0.06761    0.05015 =
         0.07338   -0.01813   -0.01651   -0.01051
AFIX  43
H99   2    1.299906    0.778646    0.229332    11.00000   -1.20000
AFIX   0
C100  1    1.343522    0.625562    0.190941    11.00000    0.04751    0.03415 =
         0.07357    0.00377   -0.02296   -0.00872
C101  1    1.402457    0.579316    0.206146    11.00000    0.05373    0.14110 =
         0.12876    0.06862    0.00834    0.00517
AFIX  43
H101  2    1.380856    0.552082    0.237997    11.00000   -1.20000
AFIX   0
C102  1    1.497701    0.566924    0.177909    11.00000    0.04332    0.20907 =
         0.21363    0.12850   -0.00286    0.02361
AFIX  43
H102  2    1.541073    0.539447    0.193340    11.00000   -1.20000
AFIX   0
C103  1    1.524787    0.594987    0.128952    11.00000    0.05679    0.10270 =
         0.20370    0.04241    0.04045    0.00068
AFIX  43
H103  2    1.586964    0.581824    0.107061    11.00000   -1.20000
AFIX   0
C104  1    1.467117    0.640369    0.110565    11.00000    0.07521    0.09781 =
         0.08898   -0.03084    0.00905   -0.04645
AFIX  43
H104  2    1.488093    0.663069    0.076652    11.00000   -1.20000
AFIX   0
C105  1    1.376167    0.654905    0.140628    11.00000    0.04916    0.10905 =
         0.06300   -0.01247   -0.01280   -0.03959
AFIX  43
H105  2    1.334054    0.686304    0.126338    11.00000   -1.20000
AFIX   0
C106  1    1.229987    0.580088    0.088298    11.00000    0.03662    0.05156 =
         0.03271    0.00195   -0.01350   -0.01138
C107  1    1.253320    0.636176    0.049958    11.00000    0.05172    0.04997 =
         0.03203    0.00586   -0.01511   -0.01657
AFIX  43
H107  2    1.217265    0.684947    0.055306    11.00000   -1.20000
AFIX   0
C108  1    1.327972    0.620298    0.005018    11.00000    0.04927    0.07498 =
         0.03730    0.00391   -0.00904   -0.02650
AFIX  43
H108  2    1.342712    0.658436   -0.020708    11.00000   -1.20000
AFIX   0
C109  1    1.381673    0.551344   -0.003816    11.00000    0.04080    0.06684 =
         0.05362   -0.00799    0.00396   -0.01388
AFIX  43
H109  2    1.434392    0.542049   -0.034709    11.00000   -1.20000
AFIX   0
C110  1    1.358753    0.495155    0.032533    11.00000    0.03625    0.06562 =
         0.07123   -0.02155   -0.01143    0.00075
AFIX  43
H110  2    1.394636    0.446306    0.025983    11.00000   -1.20000
AFIX   0
C111  1    1.282072    0.509652    0.079613    11.00000    0.03501    0.04557 =
         0.04907   -0.00973   -0.01441   -0.00334
AFIX  43
H111  2    1.266894    0.471031    0.104885    11.00000   -1.20000
AFIX   0
C112  1    1.037179    0.644788    0.124292    11.00000    0.04100    0.03477 =
         0.03242    0.00671   -0.01299   -0.00641
C113  1    1.038960    0.640898    0.069391    11.00000    0.04805    0.05597 =
         0.03283    0.00203   -0.01281   -0.01041
AFIX  43
H113  2    1.090894    0.613646    0.043432    11.00000   -1.20000
AFIX   0
C114  1    0.965169    0.676722    0.053311    11.00000    0.06616    0.06974 =
         0.03422    0.00593   -0.02042   -0.01094
AFIX  43
H114  2    0.967956    0.676137    0.016166    11.00000   -1.20000
AFIX   0
C115  1    0.886707    0.713683    0.091845    11.00000    0.05771    0.06735 =
         0.06323    0.00424   -0.04209    0.00425
AFIX  43
H115  2    0.835962    0.737483    0.080741    11.00000   -1.20000
AFIX   0
C116  1    0.882342    0.715887    0.145051    11.00000    0.04332    0.05335 =
         0.05960   -0.01102   -0.01799    0.00712
AFIX  43
H116  2    0.827915    0.739457    0.171155    11.00000   -1.20000
AFIX   0
C117  1    0.959349    0.682863    0.161366    11.00000    0.05406    0.04036 =
         0.03067   -0.00388   -0.01516    0.00316
AFIX  43
H117  2    0.957502    0.686926    0.198261    11.00000   -1.20000
AFIX   0
C118  1    0.914859    0.447442    0.145899    11.00000    0.04808    0.06406 =
         0.04749    0.02081   -0.01817   -0.02254
C119  1    0.859968    0.514397    0.164338    11.00000    0.05571    0.05839 =
         0.08324    0.01871   -0.01997   -0.00606
AFIX  43
H119  2    0.876835    0.547945    0.187108    11.00000   -1.20000
AFIX   0
C120  1    0.776863    0.534294    0.149446    11.00000    0.06086    0.06813 =
         0.11390    0.01892   -0.03265   -0.00795
AFIX  43
H120  2    0.739894    0.582202    0.160150    11.00000   -1.20000
AFIX   0
C121  1    0.752218    0.482723    0.119534    11.00000    0.06873    0.07873 =
         0.10235    0.01894   -0.04483   -0.00678
AFIX  43
H121  2    0.695064    0.494121    0.111520    11.00000   -1.20000
AFIX   0
C122  1    0.804700    0.417234    0.101119    11.00000    0.07842    0.12325 =
         0.07196    0.01293   -0.05200   -0.03500
AFIX  43
H122  2    0.786423    0.384179    0.078675    11.00000   -1.20000
AFIX   0
C123  1    0.885289    0.396872    0.114274    11.00000    0.06593    0.07984 =
         0.05703    0.00960   -0.03313   -0.02431
AFIX  43
H123  2    0.921277    0.348924    0.102209    11.00000   -1.20000
AFIX   0
C124  1    1.103346    0.384263    0.099156    11.00000    0.04826    0.06621 =
         0.03930   -0.01319   -0.02316   -0.01397
C125  1    1.101279    0.429689    0.054244    11.00000    0.07674    0.06667 =
         0.03430    0.00055   -0.00769   -0.01694
AFIX  43
H125  2    1.056108    0.473219    0.057918    11.00000   -1.20000
AFIX   0
C126  1    1.167042    0.409046    0.004542    11.00000    0.08536    0.09168 =
         0.04197   -0.00165   -0.01780   -0.02817
AFIX  43
H126  2    1.165808    0.437197   -0.026582    11.00000   -1.20000
AFIX   0
C127  1    1.232154    0.348858    0.001229    11.00000    0.05337    0.11299 =
         0.03393   -0.00829   -0.00243   -0.00601
AFIX  43
H127  2    1.278489    0.336773   -0.032349    11.00000   -1.20000
AFIX   0
C128  1    1.234562    0.305006    0.043377    11.00000    0.07512    0.12119 =
         0.07340   -0.00723    0.00338    0.02463
AFIX  43
H128  2    1.278881    0.260735    0.038860    11.00000   -1.20000
AFIX   0
C129  1    1.170414    0.325645    0.094344    11.00000    0.06763    0.06766 =
         0.04083   -0.00811   -0.01045    0.01134
AFIX  43
H129  2    1.174774    0.298017    0.125203    11.00000   -1.20000
AFIX   0
C130  1    0.917010    0.282421    0.311101    11.00000    0.04925    0.06598 =
         0.04120    0.00758   -0.01768   -0.02611
C131  1    0.974142    0.215116    0.295310    11.00000    0.09424    0.06972 =
         0.12176    0.03475    0.02658   -0.01537
AFIX  43
H131  2    1.026644    0.213229    0.264328    11.00000   -1.20000
AFIX   0
C132  1    0.956473    0.148286    0.324270    11.00000    0.13902    0.06470 =
         0.15746    0.04543    0.01709   -0.01377
AFIX  43
H132  2    0.997097    0.102154    0.312958    11.00000   -1.20000
AFIX   0
C133  1    0.882924    0.150507    0.367242    11.00000    0.11320    0.10697 =
         0.11796    0.05568   -0.02392   -0.06448
AFIX  43
H133  2    0.868646    0.105063    0.385302    11.00000   -1.20000
AFIX   0
C134  1    0.826472    0.218726    0.386137    11.00000    0.10231    0.10721 =
         0.08406    0.05044   -0.00009   -0.04079
AFIX  43
H134  2    0.777039    0.220785    0.418747    11.00000   -1.20000
AFIX   0
C135  1    0.842923    0.284487    0.356780    11.00000    0.06875    0.10890 =
         0.05923    0.02372   -0.01607   -0.01628
AFIX  43
H135  2    0.802619    0.330663    0.368558    11.00000   -1.20000
AFIX   0
C136  1    0.826234    0.415518    0.279321    11.00000    0.03710    0.06589 =
         0.03985    0.00243   -0.00880   -0.01255
C137  1    0.768107    0.382860    0.256811    11.00000    0.04267    0.07731 =
         0.05496    0.00739   -0.01319   -0.02120
AFIX  43
H137  2    0.789045    0.334809    0.238306    11.00000   -1.20000
AFIX   0
C138  1    0.680166    0.418563    0.260625    11.00000    0.05753    0.09494 =
         0.07241   -0.00530   -0.02424   -0.01929
AFIX  43
H138  2    0.641756    0.395245    0.244391    11.00000   -1.20000
AFIX   0
C139  1    0.648632    0.486162    0.287201    11.00000    0.03954    0.12588 =
         0.10183   -0.02001   -0.02173    0.00859
AFIX  43
H139  2    0.587745    0.510023    0.290087    11.00000   -1.20000
AFIX   0
C140  1    0.706818    0.522628    0.311352    11.00000    0.06882    0.10805 =
         0.09706   -0.02619   -0.01972    0.01695
AFIX  43
H140  2    0.685419    0.570482    0.330089    11.00000   -1.20000
AFIX   0
C141  1    0.794552    0.485708    0.306335    11.00000    0.03440    0.08505 =
         0.06397   -0.02048   -0.00960    0.00123
AFIX  43
H141  2    0.834212    0.508828    0.321714    11.00000   -1.20000
AFIX   0
P150  6    1.230920    0.045893   -0.053186    11.00000    0.07403    0.08534 =
         0.08372    0.03709   -0.05092   -0.03565
F151  5    1.336281    0.025980   -0.074800    11.00000    0.09668    0.18079 =
         0.12781    0.01643   -0.05453    0.00878
F152  5    1.225559    0.062124   -0.112541    11.00000    0.08595    0.18248 =
         0.08009    0.04747   -0.04904   -0.05493
F153  5    1.220580   -0.035961   -0.060148    11.00000    0.40863    0.14213 =
         0.21183    0.08679   -0.15634   -0.17920
F154  5    1.125579    0.064797   -0.031770    11.00000    0.06087    0.52217 =
         0.09399    0.04898   -0.04009   -0.04307
F155  5    1.235427    0.035577    0.007549    11.00000    0.11683    0.15050 =
         0.08789    0.05470   -0.06452   -0.05922
F156  5    1.250649    0.129440   -0.048162    11.00000    0.23405    0.08324 =
         0.11658    0.01946   -0.06717   -0.03351
C160  1    1.428323    0.355173    0.156763    11.00000    0.06423    0.18919 =
         0.07480   -0.02526   -0.01675   -0.00986
AFIX  23
H16A  2    1.391517    0.326034    0.185956    11.00000   -1.20000
H16B  2    1.400641    0.409223    0.162648    11.00000   -1.20000
AFIX   0
CL14  9    1.424518    0.323389    0.097399    11.00000    0.17329    0.06741 =
         0.07856   -0.00997   -0.03011   -0.00216
CL15  9    1.542202    0.346139    0.159402    11.00000    0.10365    0.26621 =
         0.19749    0.09792   -0.08146   -0.06446
C161  1    0.932940    0.163155    0.051634    10.75000    0.14885    0.05632 =
         0.08002    0.00520   -0.07737   -0.03529
AFIX  23
H16C  2    0.974429    0.151618    0.014433    10.75000   -1.20000
H16D  2    0.911780    0.115096    0.066503    10.75000   -1.20000
AFIX   0
CL16  9    0.996394    0.197009    0.091194    10.75000    0.21408    0.05217 =
         0.16252   -0.01186   -0.14986    0.00103
CL17  9    0.838673    0.225318    0.048748    10.75000    0.11332    0.07288 =
         0.06574   -0.00343   -0.04373   -0.00048
SAME C160 > Cl15
C162  1    0.570397    0.357541    0.403776    10.50000    0.04154    0.36219 =
         0.07644   -0.02054   -0.00853   -0.00108
AFIX  23
H16E  2    0.636402    0.357214    0.383333    10.50000   -1.20000
H16F  2    0.535127    0.351938    0.377761    10.50000   -1.20000
AFIX   0
CL18  9    0.531160    0.434696    0.439012    10.50000    0.12335    0.57738 =
         0.19052   -0.11216    0.01109   -0.17751
CL19  9    0.558158    0.285271    0.448099    10.50000    0.14966    0.55266 =
         0.14435    0.04812   -0.06816    0.01531
HKLF 4

REM  NZ1366 in P-1
REM R1 =  0.0678 for   16798 Fo > 4sig(Fo)  and  0.1188 for all   28214 data
REM   1460 parameters refined using     21 restraints

END

WGHT      0.0862      0.0000

REM Highest difference peak  2.256,  deepest hole -1.380,  1-sigma level  0.131
Q1    1   1.2265  0.0649  0.2193  11.00000  0.05    1.87
Q2    1   0.7626  0.8414  0.3678  11.00000  0.05    1.54
Q3    1   0.5772  0.2201  0.4578  11.00000  0.05    1.49
Q4    1   0.8647  0.8143  0.3638  11.00000  0.05    1.43
Q5    1   1.2709  0.0444  0.2359  11.00000  0.05    1.42
Q6    1   1.0605  0.5037  0.2921  11.00000  0.05    1.35
Q7    1   0.8291  0.9082  0.3468  11.00000  0.05    1.18
Q8    1   1.2763  0.6804 -0.0585  11.00000  0.05    1.06
Q9    1   0.6263  0.2773  0.3683  11.00000  0.05    1.06
Q10   1   0.8789  0.8569  0.3410  11.00000  0.05    1.04
Q11   1   1.2573  0.0823  0.1766  11.00000  0.05    0.95
Q12   1   0.9170  0.4269  0.3205  11.00000  0.05    0.95
Q13   1   0.7313  0.3007  0.4281  11.00000  0.05    0.94
Q14   1   0.5797  0.4215  0.4215  11.00000  0.05    0.89
Q15   1   0.6342  0.3643  0.4682  11.00000  0.05    0.89
Q16   1   1.3236  0.0931  0.1822  11.00000  0.05    0.87
Q17   1   0.5650  0.2420  0.4239  11.00000  0.05    0.86
Q18   1   1.4808  0.1685 -0.0608  11.00000  0.05    0.81
Q19   1   0.8067  0.8137  0.4091  11.00000  0.05    0.81
Q20   1   1.0613  0.3929  0.2935  11.00000  0.05    0.81
;
_shelx_res_checksum   47420

_shelx_hkl_file
;
   0   0   3 1267396   45544                                                      315975  -33.17   -0.04  1.0000
   0   0  -4  309773   29018                                                       58586   18.51   -0.01  1.0000
   0   0  -4  346852   25412                                                       75310   18.51   -0.01  1.0000
   0   0   4  325743   32733                                                       65638   18.51    0.01  1.0000
   0   0  -4  342839   25603                                                       73446   18.51   -0.01  1.0000
   0   0   4  345673   27342                                                       74751   18.51    0.01  1.0000
   0   0   4  341730   27657                                                       72923   18.51    0.01  1.0000
   0   0  -4  255122   16340                                                       36308   18.51   -0.01  1.0000
   0   0   4  358499   24118                                                       80780   18.51    0.01  1.0000
   0   0   4  314023   30321                                                       60434   18.51    0.01  1.0000
   0   0  -4  311675   19583                                                       59415   18.51   -0.01  1.0000
   0   0  -511258825  309241                                                    10805012   -4.04   -0.02  1.0000
   0   0   511754356  356958                                                    11290950   -4.04    0.02  1.0000
   0   0   511498486  270522                                                    11040203   -4.04    0.02  1.0000
   0   0  -511093933  349803                                                    10643489   -4.04   -0.02  1.0000
   0   0   511723311  315105                                                    11260524   -4.04    0.02  1.0000
   0   0   512114056  362363                                                    11643542   -4.04    0.02  1.0000
   0   0  -511660216  274529                                                    11198302   -4.04   -0.02  1.0000
   0   0   512195082  322018                                                    11722982   -4.04    0.02  1.0000
   0   0  -511374764  306842                                                    10918596   -4.04   -0.02  1.0000
   0   0  -511883615  362676                                                    11417253   -4.04   -0.02  1.0000
   0   0   6 7230493  323333                                                     7726107   -5.33   -0.04  1.0000
   0   0  -6 7321833  252298                                                     7820301   -5.33    0.04  1.0000
   0   0   6 7592232  293256                                                     8099889   -5.33   -0.04  1.0000
   0   0   6 6674448  239394                                                     7150945   -5.33   -0.04  1.0000
   0   0   6 7332560  325951                                                     7831601   -5.33   -0.04  1.0000
   0   0  -6 6900296  320140                                                     7384444   -5.33    0.04  1.0000
   0   0   6 7239976  284860                                                     7735910   -5.33   -0.04  1.0000
   0   0  -6 7094187  284256                                                     7584973   -5.33    0.04  1.0000
   0   0  -6 6890905  282976                                                     7374729   -5.33    0.04  1.0000
   0   0   7 5641608  294842                                                     5228558    5.27    0.07  1.0000
   0   0  -7 5595655  256714                                                     5185962    5.27   -0.07  1.0000
   0   0   7 6471658  269269                                                     6028718    5.27    0.07  1.0000
   0   0  -7 5473407  256454                                                     5068297    5.27   -0.07  1.0000
   0   0   7 5361987  287774                                                     4959497    5.27    0.07  1.0000
   0   0   7 6282739  271096                                                     5846425    5.27    0.07  1.0000
   0   0   7 5669259  221024                                                     5255179    5.27    0.07  1.0000
   0   0  -7 5717545  226771                                                     5303332    5.27   -0.07  1.0000
   0   0  -7 5737028  298374                                                     5322097    5.27   -0.07  1.0000
   0   0  -8  123032   54977                                                      111073   -1.76    0.07  1.0000
   0   0   8  142890   46987                                                      128663   -1.76   -0.07  1.0000
   0   0  -8  143099   48176                                                      130224   -1.76    0.07  1.0000
   0   0  -8  121015   51150                                                      109153   -1.76    0.07  1.0000
   0   0   8  183748   44525                                                      167635   -1.76   -0.07  1.0000
   0   0  -8  166084   55336                                                      152237   -1.76    0.07  1.0000
   0   0   8  144001   46254                                                      129719   -1.76   -0.07  1.0000
   0   0   8   91830   49695                                                       80395   -1.76   -0.07  1.0000
   0   0   8  127464   54832                                                      114018   -1.76   -0.07  1.0000
   0   0   9  787090  110917                                                      763458    0.79    0.03  1.0000
   0   0   9  548619  104869                                                      528919    0.79    0.03  1.0000
   0   0  -9  542116   77810                                                      522491    0.79   -0.03  1.0000
   0   0  -9  541805   94000                                                      522186    0.79   -0.03  1.0000
   0   0   9  622211   83285                                                      601219    0.79    0.03  1.0000
   0   0   9  633971  117051                                                      612780    0.79    0.03  1.0000
   0   0   9  688436  105850                                                      666346    0.79    0.03  1.0000
   0   0  -9  606225  112913                                                      585461    0.79   -0.03  1.0000
   0   0  -9  631188   98840                                                      609997    0.79   -0.03  1.0000
   0   0  10 3420107  245698                                                     3315387   -1.68    0.00  1.0000
   0   0 -10 3477513  211191                                                     3371916   -1.68    0.00  1.0000
   0   0  10 3690144  284249                                                     3581338   -1.68    0.00  1.0000
   0   0 -10 3506592  247167                                                     3400551   -1.68    0.00  1.0000
   0   0  10 3608416  287982                                                     3500831   -1.68    0.00  1.0000
   0   0  10 3524200  248430                                                     3417887   -1.68    0.00  1.0000
   0   0  10 3472936  214268                                                     3367405   -1.68    0.00  1.0000
   0   0 -10 3294078  272200                                                     3191325   -1.68    0.00  1.0000
   0   0 -10 3386486  240001                                                     3282290   -1.68    0.00  1.0000
   0   0 -11  407430  104538                                                      461219    2.41   -0.03  1.0000
   0   0  11  403706  125046                                                      457355    2.41    0.03  1.0000
   0   0 -11  340512   80718                                                      389827    2.41   -0.03  1.0000
   0   0  11  496350  135563                                                      555656    2.41    0.03  1.0000
   0   0  11  350426   79473                                                      400523    2.41    0.03  1.0000
   0   0 -11  421091  104644                                                      475747    2.41   -0.03  1.0000
   0   0  11  433758  107513                                                      489308    2.41    0.03  1.0000
   0   0  1216810186  532470                                                    17137472   -2.34   -0.04  1.0000
   0   0 -1216761610  607641                                                    17087284   -2.34    0.04  1.0000
   0   0  1217899928  710170                                                    18237608   -2.34   -0.04  1.0000
   0   0  1216537436  697371                                                    16862072   -2.34   -0.04  1.0000
   0   0  1217884516  632483                                                    18222054   -2.34   -0.04  1.0000
   0   0 -1216958798  538572                                                    17286376   -2.34    0.04  1.0000
   0   0 -1216356604  617818                                                    16678341   -2.34    0.04  1.0000
   0   0 -13 1369794  165634                                                     1422204    1.32    0.00  1.0000
   0   0 -13 1366625  190298                                                     1418975    1.32    0.00  1.0000
   0   0  13 1275751  213064                                                     1326376    1.32    0.00  1.0000
   0   0  13 1368065  213510                                                     1420472    1.32    0.00  1.0000
   0   0  13 1445441  165788                                                     1499297    1.32    0.00  1.0000
   0   0 -13 1300969  189254                                                     1352057    1.32    0.00  1.0000
   0   0 -14 5914914  399146                                                     5887574   -0.33   -0.03  1.0000
   0   0 -14 6774012  368141                                                     6744751   -0.33   -0.03  1.0000
   0   0  14 6464514  459606                                                     6436380   -0.33    0.03  1.0000
   0   0 -14 6498998  409940                                                     6470338   -0.33   -0.03  1.0000
   0   0  14 6326098  461426                                                     6298268   -0.33    0.03  1.0000
   0   0  14 6207468  343237                                                     6179900   -0.33    0.03  1.0000
   0   0  15 1759092  259174                                                     1745905    0.30   -0.01  1.0000
   0   0 -15 1317419  185161                                                     1305929    0.30    0.01  1.0000
   0   0  15 1535408  177407                                                     1523090    0.30   -0.01  1.0000
   0   0  15 1815665  258728                                                     1802267    0.30   -0.01  1.0000
   0   0 -15 1492991  208907                                                     1480757    0.30    0.01  1.0000
   0   0  16  485118  145941                                                      489641   -0.19    0.01  1.0000
   0   0 -16  700795  155175                                                      706233   -0.19   -0.01  1.0000
   0   0  16  699608  127048                                                      705037   -0.19    0.01  1.0000
   0   0  16  707161  174296                                                      712619   -0.19    0.01  1.0000
   0   0 -16  590189  127494                                                      595180   -0.19   -0.01  1.0000
   0   0 -17  573463  132502                                                      591363   -0.71    0.04  1.0000
   0   0  17  347702   92150                                                      361960   -0.71   -0.04  1.0000
   0   0  17  557693  110529                                                      575712   -0.71   -0.04  1.0000
   0   0  17  636332  164128                                                      655571   -0.71   -0.04  1.0000
   0   0 -17  669686  145979                                                      689019   -0.71    0.04  1.0000
   0   0  18  625759  177765                                                      658181    1.19    0.04  1.0000
   0   0 -18  795661  185494                                                      831997    1.19   -0.04  1.0000
   0   0  18  612486  127901                                                      644566    1.19    0.04  1.0000
   0   0 -18  765257  179474                                                      800899    1.19   -0.04  1.0000
   0   0  18  852004  203441                                                      889767    1.19    0.04  1.0000
   0   0  19 5303011  372109                                                     5261391   -0.54   -0.01  1.0000
   0   0 -19 5262571  440460                                                     5221211   -0.54    0.01  1.0000
   0   0 -19 5466242  456525                                                     5424088   -0.54    0.01  1.0000
   0   0  19 5229367  494348                                                     5188036   -0.54   -0.01  1.0000
   0   0  19 5562535  504619                                                     5519906   -0.54   -0.01  1.0000
   0   0  20  241165   70158                                                      245808   -0.29    0.00  1.0000
   0   0 -20  419233  134901                                                      425405   -0.29    0.00  1.0000
   0   0  20  229930  115082                                                      234464   -0.29    0.00  1.0000
   0   0 -20  320801  123948                                                      326203   -0.29    0.00  1.0000
   0   0  20  310687  101716                                                      315954   -0.29    0.00  1.0000
   0   0  21  213113  120223                                                      218687    0.36   -0.02  1.0000
   0   0  21  101131   90387                                                      104981    0.36   -0.02  1.0000
   0   0 -21  187298   81499                                                      192413    0.36    0.02  1.0000
   0   0 -21   30575   88992                                                       32660    0.36    0.02  1.0000
   0   0  21   37787   57858                                                       40155    0.36   -0.02  1.0000
   0   0 -22  277283  119415                                                      279971    0.15    0.00  1.0000
   0   0  22  540319  140529                                                      544063    0.15    0.00  1.0000
   0   0 -22  326736  135653                                                      329653    0.15    0.00  1.0000
   0   0  22  735211  205275                                                      739578    0.15    0.00  1.0000
   0   0  22  248991   84013                                                      251535    0.15    0.00  1.0000
   0   0 -23      28   95716                                                      -38135   -0.31   -0.03  1.0000
   0   0  23      28  111332                                                      -79676   -0.31    0.03  1.0000
   0   0  23      28  128616                                                      -94122   -0.31    0.03  1.0000
   0   0  23   21600   72793                                                       20068   -0.31    0.03  1.0000
   0   0 -23      28   92105                                                      -32206   -0.31   -0.03  1.0000
   0   0 -24  175657  102078                                                      171269   -0.34    0.03  1.0000
   0   0 -24   59733   86943                                                       57184   -0.34    0.03  1.0000
   0   0  24  153238  104788                                                      148926   -0.34   -0.03  1.0000
   0   0  24      33  136323                                                      -52172   -0.34   -0.03  1.0000
   0   0  24  157344   50676                                                      152974   -0.34   -0.03  1.0000
   0   0 -25   40647   74089                                                       35782    0.78   -0.02  1.0000
   0   0  25  102538   74528                                                       94601    0.78    0.02  1.0000
   0   0  25  321971  186509                                                      307794    0.78    0.02  1.0000
   0   0 -25   43922   76421                                                       38859    0.78   -0.02  1.0000
   0   0  25  176536  149695                                                      166076    0.78    0.02  1.0000
   0   0 -26       5  123698                                                     -119658   -0.13    0.03  1.0000
   0   0 -26   39429   71614                                                       38551   -0.13    0.03  1.0000
   0   0  26       5  148810                                                      -68422   -0.13   -0.03  1.0000
   0   0  26       5   59812                                                       -2094   -0.13   -0.03  1.0000
   0   0 -27   14852   83389                                                       13817   -0.33   -0.03  1.0000
   0   0 -27  100539   80040                                                       97839   -0.33   -0.03  1.0000
   0   0  27   70405   91388                                                       68526   -0.33    0.03  1.0000
   0   0 -28  579608  216219                                                      595204   -0.60    0.00  1.0000
   0   0  28  574818  188399                                                      590370   -0.60    0.00  1.0000
   0   0 -28  579640  203236                                                      595236   -0.60    0.00  1.0000
   0   0  29  168469  151167                                                      188204    1.38   -0.01  1.0000
   0   0 -29   95417   86391                                                      110417    1.38    0.01  1.0000
   0   0 -29  143830  133630                                                      162123    1.38    0.01  1.0000
   0   0 -30      60   84756                                                       -6976   -0.46    0.00  1.0000
   0   0 -31  662466  235308                                                      686862   -0.90    0.01  1.0000
   0   1 -30  736073  212493                                                      773552   -1.29   -0.01  1.0000
   0   1 -29       9  141930                                                     -210243    0.18   -0.01  1.0000
   0   1 -29  125789  155713                                                      126675    0.18   -0.01  1.0000
   0  -1  29       9  119253                                                      -32675    0.18    0.01  1.0000
   0  -1  28      50  171078                                                     -276012    0.42   -0.02  1.0000
   0   1 -28   84361   99753                                                       80489    0.42    0.02  1.0000
   0   1 -28      50  111552                                                      -12792    0.42    0.02  1.0000
   0   1 -27  319684  152897                                                      321582    0.10    0.00  1.0000
   0  -1  27  416991  182320                                                      419166    0.10    0.00  1.0000
   0  -1  27  310813  109884                                                      312691    0.10    0.00  1.0000
   0   1 -27  535942  168302                                                      538399    0.10    0.00  1.0000
   0   1 -26  366116  162934                                                      366914   -0.04   -0.01  1.0000
   0  -1  26  460035  186339                                                      460897   -0.04    0.01  1.0000
   0   1 -26  328086  150763                                                      328841   -0.04   -0.01  1.0000
   0  -1  26  364415  124113                                                      365182   -0.04    0.01  1.0000
   0  -1  25  458896  173669                                                      477387   -0.81    0.01  1.0000
   0   1 -25  767776  208632                                                      791766   -0.81   -0.01  1.0000
   0  -1  25  637463  153781                                                      659225   -0.81    0.01  1.0000
   0   1 -25  839958  208763                                                      865042   -0.81   -0.01  1.0000
   0  -1  24 1629532  247928                                                     1657522    0.65   -0.02  1.0000
   0   1 -24 1781023  290296                                                     1810553    0.65    0.02  1.0000
   0   1 -24 1312485  266234                                                     1337852    0.65    0.02  1.0000
   0  -1  24 1293714  283037                                                     1318667    0.65   -0.02  1.0000
   0  -1  23  105190   86384                                                      111780    0.62   -0.01  1.0000
   0   1 -23     111   91601                                                      -33870    0.62    0.01  1.0000
   0   1 -23    8840   80616                                                       10829    0.62    0.01  1.0000
   0  -1  23     111   95494                                                      -54461    0.62   -0.01  1.0000
   0  -1  22  293068  121089                                                      313833   -1.13    0.03  1.0000
   0   1 -22   52761   77108                                                       61873   -1.13   -0.03  1.0000
   0   1 -22  183527  110823                                                      200215   -1.13   -0.03  1.0000
   0  -1  22  136415  128014                                                      150690   -1.13    0.03  1.0000
   0  -1  22  187029  135078                                                      203685   -1.13    0.03  1.0000
   0  -1  21  285468  114802                                                      288352    0.16   -0.03  1.0000
   0  -1  21  316575  119512                                                      319612    0.16   -0.03  1.0000
   0   1 -21  219175  120593                                                      221822    0.16    0.03  1.0000
   0   1 -21  338853  127790                                                      342142    0.16    0.03  1.0000
   0  -1  21  245365  126968                                                      248039    0.16   -0.03  1.0000
   0  -1  20 2102760  256376                                                     2055411    0.97    0.03  1.0000
   0   1 -20 2123884  304402                                                     2076631    0.97   -0.03  1.0000
   0  -1  20 1942468  302318                                                     1896970    0.97    0.03  1.0000
   0  -1  20 2156657  317829                                                     2108701    0.97    0.03  1.0000
   0   1 -20 2092983  284138                                                     2046077    0.97   -0.03  1.0000
   0  -1  19  109082   92799                                                      115942   -0.73   -0.06  1.0000
   0   1 -19  101543   87964                                                      108853   -0.73    0.06  1.0000
   0  -1  19  199919  123074                                                      209187   -0.73   -0.06  1.0000
   0  -1  19   48509   86644                                                       53101   -0.73   -0.06  1.0000
   0   1 -19   70322   66995                                                       76422   -0.73    0.06  1.0000
   0  -1  18  851015  199880                                                      830715   -0.67    0.07  1.0000
   0   1 -18  769831  164564                                                      749834   -0.67   -0.07  1.0000
   0  -1  18  741097  177755                                                      722160   -0.67    0.07  1.0000
   0   1 -18  822586  180058                                                      801911   -0.67   -0.07  1.0000
   0  -1  18  841030  159671                                                      820849   -0.67    0.07  1.0000
   0   1 -17 3948158  345818                                                     3860711    1.30    0.06  1.0000
   0  -1  17 3555705  379434                                                     3473623    1.30   -0.06  1.0000
   0  -1  17 3873775  398894                                                     3788079    1.30   -0.06  1.0000
   0   1 -17 4134913  361884                                                     4045410    1.30    0.06  1.0000
   0  -1  17 3974590  314846                                                     3887781    1.30   -0.06  1.0000
   0   1 -16  602588  144948                                                      595885   -0.25   -0.06  1.0000
   0  -1  16  543503  144844                                                      537306   -0.25    0.06  1.0000
   0  -1  16  620043  166204                                                      613423   -0.25    0.06  1.0000
   0   1 -16  821933  154771                                                      814101   -0.25   -0.06  1.0000
   0  -1  16  691013  128641                                                      684024   -0.25    0.06  1.0000
   0   1 -15  159085   79963                                                      148696   -0.78    0.04  1.0000
   0  -1  15  192153   65152                                                      180631   -0.78   -0.04  1.0000
   0   1 -15   71507   54697                                                       64599   -0.78    0.04  1.0000
   0  -1  15  148297   44742                                                      138197   -0.78   -0.04  1.0000
   0  -1  15  217197   89766                                                      204936   -0.78   -0.04  1.0000
   0   1 -14  110214   65345                                                      103730    0.58    0.02  1.0000
   0   1 -14   84090   61730                                                       78438    0.58    0.02  1.0000
   0  -1  14   56944   53610                                                       52295    0.58   -0.02  1.0000
   0  -1  14    8413   77570                                                        6687    0.58   -0.02  1.0000
   0  -1  14   35151   46218                                                       31520    0.58   -0.02  1.0000
   0  -1  13  558207  106170                                                      547910   -0.43    0.06  1.0000
   0  -1  13  523993  128019                                                      514019   -0.43    0.06  1.0000
   0   1 -13  462030  113387                                                      452024   -0.43   -0.06  1.0000
   0   1 -13  605789  114081                                                      594325   -0.43   -0.06  1.0000
   0  -1  13  710512  152999                                                      698890   -0.43    0.06  1.0000
   0   1 -13  588162  121355                                                      576867   -0.43   -0.06  1.0000
   0   1 -12 6918966  348634                                                     6806591    1.26    0.05  1.0000
   0  -1  12 6577259  418060                                                     6468694    1.26   -0.05  1.0000
   0  -1  12 6926939  345187                                                     6815514    1.26   -0.05  1.0000
   0  -1  12 7413816  391577                                                     7298527    1.26   -0.05  1.0000
   0  -1  12 8042626  430072                                                     7922528    1.26   -0.05  1.0000
   0   1 -12 6753315  377338                                                     6642300    1.26    0.05  1.0000
   0   1 -12 6963371  386108                                                     6850636    1.26    0.05  1.0000
   0  -1  12 7025211  441473                                                     6912995    1.26   -0.05  1.0000
   0   1 -11  124177   75121                                                      150043   -2.07   -0.05  1.0000
   0  -1  11  115135   70711                                                      139919   -2.07    0.05  1.0000
   0  -1  11  159487   88598                                                      188450   -2.07    0.05  1.0000
   0  -1  11  134632   66813                                                      161337   -2.07    0.05  1.0000
   0  -1  11   70955   49485                                                       90664   -2.07    0.05  1.0000
   0  -1  11  143104   81472                                                      170601   -2.07    0.05  1.0000
   0   1 -11   57416   72277                                                       75390   -2.07   -0.05  1.0000
   0   1 -11   70620   49179                                                       90423   -2.07   -0.05  1.0000
   0   1 -11   84590   69936                                                      106149   -2.07   -0.05  1.0000
   0   1 -10 1023772  129942                                                     1072587    1.42    0.08  1.0000
   0  -1  10 1011858  156351                                                     1059007    1.42   -0.08  1.0000
   0  -1  10 1138889  168503                                                     1188881    1.42   -0.08  1.0000
   0   1 -10 1064613  157507                                                     1114381    1.42    0.08  1.0000
   0  -1  10 1262516  161761                                                     1315125    1.42   -0.08  1.0000
   0   1 -10  835567  148834                                                      879721    1.42    0.08  1.0000
   0  -1  10 1106492  146206                                                     1155774    1.42   -0.08  1.0000
   0   1 -10  739261  114221                                                      780825    1.42    0.08  1.0000
   0  -1  10 1220318  150404                                                     1272049    1.42   -0.08  1.0000
   0   1 -10  901870  133098                                                      947720    1.42    0.08  1.0000
   0  -1  10 1106319  133885                                                     1155598    1.42   -0.08  1.0000
   0  -1   9  272958   63802                                                      246788    1.51    0.09  1.0000
   0  -1   9  274768   62967                                                      248509    1.51    0.09  1.0000
   0   1  -9  222152   68571                                                      198973    1.51   -0.09  1.0000
   0   1  -9  221235   56734                                                      198105    1.51   -0.09  1.0000
   0   1  -9  342571   88957                                                      313639    1.51   -0.09  1.0000
   0  -1   9  290927   80377                                                      263888    1.51    0.09  1.0000
   0  -1   9  245514   55426                                                      220728    1.51    0.09  1.0000
   0  -1   9  404206   93008                                                      372217    1.51    0.09  1.0000
   0   1  -9  337038   79557                                                      308345    1.51   -0.09  1.0000
   0  -1   9  280608   62742                                                      254064    1.51    0.09  1.0000
   0   1  -9  219393   53745                                                      196362    1.51   -0.09  1.0000
   0  -1   8  296835   98614                                                      393020   -4.88   -0.05  1.0000
   0  -1   8  168839   64685                                                      243001   -4.88   -0.05  1.0000
   0   1  -8  304551   90078                                                      402157   -4.88    0.05  1.0000
   0  -1   8  295737   80385                                                      391757   -4.88   -0.05  1.0000
   0  -1   8  257965   86365                                                      348078   -4.88   -0.05  1.0000
   0  -1   8  233821   74952                                                      319931   -4.88   -0.05  1.0000
   0   1  -8  184900   64101                                                      262423   -4.88    0.05  1.0000
   0  -1   8  213309   71999                                                      295851   -4.88   -0.05  1.0000
   0   1  -8  237772   71524                                                      324791   -4.88    0.05  1.0000
   0   1  -8  269973   86831                                                      362260   -4.88    0.05  1.0000
   0   1  -8  235292   70542                                                      321891   -4.88    0.05  1.0000
   0  -1   735364248  645265                                                    34609340    3.76    0.02  1.0000
   0   1  -735511488  616169                                                    34755308    3.76   -0.02  1.0000
   0  -1   733395932  696126                                                    32662456    3.76    0.02  1.0000
   0   1  -733456874  623339                                                    32723014    3.76   -0.02  1.0000
   0   1  -734437436  719032                                                    33692836    3.76   -0.02  1.0000
   0  -1   734279280  729338                                                    33536108    3.76    0.02  1.0000
   0  -1   733843164  591083                                                    33104760    3.76    0.02  1.0000
   0  -1   734746716  650085                                                    33998468    3.76    0.02  1.0000
   0  -1   736848884  704263                                                    36078212    3.76    0.02  1.0000
   0   1  -735786500  746152                                                    35027380    3.76   -0.02  1.0000
   0   1  -733568156  641797                                                    32833078    3.76   -0.02  1.0000
   0  -1   6 3196583  187146                                                     3055483    2.35    0.01  1.0000
   0  -1   6 3464129  174987                                                     3317178    2.35    0.01  1.0000
   0  -1   6 3251875  200903                                                     3109546    2.35    0.01  1.0000
   0   1  -6 2883151  168507                                                     2749314    2.35   -0.01  1.0000
   0  -1   6 3068538  204939                                                     2930325    2.35    0.01  1.0000
   0  -1   6 3303165  195855                                                     3159705    2.35    0.01  1.0000
   0  -1   6 3203618  178779                                                     3062361    2.35    0.01  1.0000
   0   1  -6 3096296  191358                                                     2957542    2.35   -0.01  1.0000
   0   1  -6 3374050  177220                                                     3229137    2.35   -0.01  1.0000
   0   1  -6 3298558  204688                                                     3155293    2.35   -0.01  1.0000
   0   1  -6 3148453  205390                                                     3008523    2.35   -0.01  1.0000
   0  -1   532526902  497114                                                    31095458   -7.49   -0.07  1.0000
   0  -1   533100384  531502                                                    31656240   -7.49   -0.07  1.0000
   0   1  -531512162  505033                                                    30105874   -7.49    0.07  1.0000
   0  -1   532074098  559722                                                    30652762   -7.49   -0.07  1.0000
   0  -1   533283256  596528                                                    31835078   -7.49   -0.07  1.0000
   0  -1   535226392  579280                                                    33736080   -7.49   -0.07  1.0000
   0   1  -531413672  592420                                                    30009606   -7.49    0.07  1.0000
   0   1  -532271156  562781                                                    30847842   -7.49    0.07  1.0000
   0   1  -530294266  551107                                                    28915730   -7.49    0.07  1.0000
   0   1  -531213674  529393                                                    29814134   -7.49    0.07  1.0000
   0  -1   532252124  512028                                                    30826808   -7.49   -0.07  1.0000
   0   1  -533750636  506921                                                    32294698   -7.49    0.07  1.0000
   0   1  -4   13984   32031                                                       92033   12.92   -0.11  1.0000
   0  -1   4    8722   30293                                                       70979   12.92    0.11  1.0000
   0   1  -4   12430   25870                                                       86922   12.92   -0.11  1.0000
   0  -1   4   17618   33914                                                      101554   12.92    0.11  1.0000
   0   1  -4   18272   32326                                                      104794   12.92   -0.11  1.0000
   0  -1   4   15461   30748                                                       95182   12.92    0.11  1.0000
   0  -1   4   14890   26732                                                       93425   12.92    0.11  1.0000
   0   1  -4    5604   19555                                                       54877   12.92   -0.11  1.0000
   0   1  -4    5676   22865                                                       55513   12.92   -0.11  1.0000
   0  -1   4   12278   31921                                                       84862   12.92    0.11  1.0000
   0  -1   4   17997   34366                                                      102635   12.92    0.11  1.0000
   0   1  -4   24470   34401                                                      121100   12.92   -0.11  1.0000
   0   1  -3  741632   98820                                                     1834190  -29.41    0.10  1.0000
   0   1  -3  862737  119538                                                     2022559  -29.41    0.10  1.0000
   0  -1   3  755052  104291                                                     1856741  -29.41   -0.10  1.0000
   0  -1   3  803094   98699                                                     1931857  -29.41   -0.10  1.0000
   0  -1   3  824688  103405                                                     1965355  -29.41   -0.10  1.0000
   0   1  -3  817018  105626                                                     1952040  -29.41    0.10  1.0000
   0  -1   3  744941  104396                                                     1840823  -29.41   -0.10  1.0000
   0   1  -3  827780  104409                                                     1968701  -29.41    0.10  1.0000
   0  -1   3  768500  111277                                                     1877853  -29.41   -0.10  1.0000
   0  -1   3  827755  103969                                                     1970100  -29.41   -0.10  1.0000
   0   1  -3  815863  114740                                                     1950250  -29.41    0.10  1.0000
   0  -1   3  844403  113267                                                     1995801  -29.41   -0.10  1.0000
   0   1  -3  902613  111161                                                     2083528  -29.41    0.10  1.0000
   0   1   3 4575379  133560                                                     3034107  -23.44   -0.02  1.0000
   0   1   3 4769947  146338                                                     3192949  -23.44   -0.02  1.0000
   0  -1  -3 4657352  157895                                                     3101123  -23.44    0.02  1.0000
   0  -1  -3 4574687  125376                                                     3033725  -23.44    0.02  1.0000
   0   1   3 4373270  117606                                                     2869923  -23.44   -0.02  1.0000
   0   1   3 4561779  154588                                                     3023032  -23.44   -0.02  1.0000
   0  -1  -3 4425071  139654                                                     2912099  -23.44    0.02  1.0000
   0   1   3 4758898  127544                                                     3183909  -23.44   -0.02  1.0000
   0  -1  -3 4278024  130138                                                     2793026  -23.44    0.02  1.0000
   0  -1  -4 3836706  207291                                                     4231607    5.78    0.01  1.0000
   0   1   4 3550275  182749                                                     3930505    5.78   -0.01  1.0000
   0  -1  -4 3559069  176797                                                     3939770    5.78    0.01  1.0000
   0  -1  -4 3853848  168644                                                     4249608    5.78    0.01  1.0000
   0  -1  -4 3620202  185797                                                     4004076    5.78    0.01  1.0000
   0   1   4 3397145  197189                                                     3769295    5.78   -0.01  1.0000
   0   1   4 3862319  169271                                                     4258491    5.78   -0.01  1.0000
   0   1   4 3602000  175806                                                     3984920    5.78   -0.01  1.0000
   0   1   4 3571709  130711                                                     3953056    5.78   -0.01  1.0000
   0   1   5  254337   43374                                                      318858    3.57    0.04  1.0000
   0   1   5  232317   51763                                                      294142    3.57    0.04  1.0000
   0  -1  -5  234787   64363                                                      296775    3.57   -0.04  1.0000
   0   1   5  248346   64215                                                      312145    3.57    0.04  1.0000
   0   1   5  160338   54299                                                      212310    3.57    0.04  1.0000
   0  -1  -5  277199   61401                                                      344243    3.57   -0.04  1.0000
   0   1   5  145821   43872                                                      195551    3.57    0.04  1.0000
   0  -1  -5  230343   55251                                                      291775    3.57   -0.04  1.0000
   0  -1  -6  143444   56403                                                      192540   -3.54    0.05  1.0000
   0   1   6  131990   51386                                                      179127   -3.54   -0.05  1.0000
   0   1   6   69061   48089                                                      104142   -3.54   -0.05  1.0000
   0  -1  -6   85800   37265                                                      124584   -3.54    0.05  1.0000
   0   1   6   58937   29393                                                       91616   -3.54   -0.05  1.0000
   0  -1  -6  101346   55672                                                      143185   -3.54    0.05  1.0000
   0   1   6   73443   40725                                                      109509   -3.54   -0.05  1.0000
   0   1   6   84476   45826                                                      122898   -3.54   -0.05  1.0000
   0  -1  -733493268  519800                                                    32809990    3.50   -0.02  1.0000
   0   1   732814176  513463                                                    32137286    3.50    0.02  1.0000
   0   1   733993248  630430                                                    33304242    3.50    0.02  1.0000
   0  -1  -733679488  631710                                                    32994306    3.50   -0.02  1.0000
   0  -1  -733039638  665351                                                    32361030    3.50   -0.02  1.0000
   0   1   733258728  662886                                                    32577242    3.50    0.02  1.0000
   0   1   732559216  733247                                                    31884974    3.50    0.02  1.0000
   0  -1  -734899800  761511                                                    34202256    3.50   -0.02  1.0000
   0   1   733172028  669447                                                    32491442    3.50    0.02  1.0000
   0   1   732561388  744529                                                    31887126    3.50    0.02  1.0000
   0   1   8 2259994  165144                                                     1946111   -6.48    0.02  1.0000
   0  -1  -8 2251671  197296                                                     1938011   -6.48   -0.02  1.0000
   0   1   8 2164880  188687                                                     1857915   -6.48    0.02  1.0000
   0   1   8 2041029  165293                                                     1743303   -6.48    0.02  1.0000
   0   1   8 2427198  179703                                                     2101500   -6.48    0.02  1.0000
   0   1   8 2148405  192713                                                     1842653   -6.48    0.02  1.0000
   0  -1  -8 2372420  141395                                                     2050157   -6.48   -0.02  1.0000
   0   1   8 2131502  136059                                                     1826999   -6.48    0.02  1.0000
   0  -1  -8 2159058  160304                                                     1852152   -6.48   -0.02  1.0000
   0  -1  -8 2384604  190262                                                     2061486   -6.48   -0.02  1.0000
   0  -1  -914925059  525379                                                    16008573    8.13    0.02  1.0000
   0   1   915353543  532554                                                    16451856    8.13   -0.02  1.0000
   0   1   915920406  510494                                                    17038466    8.13   -0.02  1.0000
   0   1   913948557  408652                                                    14996291    8.13   -0.02  1.0000
   0   1   915543815  540668                                                    16648795    8.13   -0.02  1.0000
   0  -1  -914387161  504263                                                    15451314    8.13    0.02  1.0000
   0  -1  -916148254  610255                                                    17274538    8.13    0.02  1.0000
   0   1   914337198  581359                                                    15399169    8.13   -0.02  1.0000
   0  -1  -915376336  422160                                                    16475826    8.13    0.02  1.0000
   0   1   915109458  592537                                                    16199153    8.13   -0.02  1.0000
   0   1  10 1739067   92592                                                     2064539   -7.06   -0.03  1.0000
   0   1  10 1912439  209560                                                     2253093   -7.06   -0.03  1.0000
   0   1  10 1829867  165984                                                     2163380   -7.06   -0.03  1.0000
   0   1  10 2115045  213491                                                     2472592   -7.06   -0.03  1.0000
   0  -1 -10 2158242  226018                                                     2518779   -7.06    0.03  1.0000
   0   1  10 1939584  240509                                                     2282551   -7.06   -0.03  1.0000
   0  -1 -10 1900372  167463                                                     2239514   -7.06    0.03  1.0000
   0   1  10 1975044  212459                                                     2321009   -7.06   -0.03  1.0000
   0   1  10 1891697  231135                                                     2230572   -7.06   -0.03  1.0000
   0  -1 -10 2103692  249979                                                     2459815   -7.06    0.03  1.0000
   0  -1 -10 1829850  196740                                                     2162891   -7.06    0.03  1.0000
   0   1  11 4597486  129840                                                     4227371    5.18    0.04  1.0000
   0   1  11 4728948  301415                                                     4353468    5.18    0.04  1.0000
   0   1  11 5168636  356874                                                     4775737    5.18    0.04  1.0000
   0   1  11 4646279  242108                                                     4274164    5.18    0.04  1.0000
   0   1  11 5227031  318076                                                     4831873    5.18    0.04  1.0000
   0   1  11 4887794  345198                                                     4505932    5.18    0.04  1.0000
   0  -1 -11 4307139  290206                                                     3949250    5.18   -0.04  1.0000
   0  -1 -11 4762922  304570                                                     4386174    5.18   -0.04  1.0000
   0   1  12  791854  166008                                                      899903   -3.47   -0.03  1.0000
   0  -1 -12  849730  148295                                                      961365   -3.47    0.03  1.0000
   0   1  12  690841  148233                                                      791990   -3.47   -0.03  1.0000
   0   1  12  849867  124593                                                      961681   -3.47   -0.03  1.0000
   0   1  12  646255  133799                                                      744197   -3.47   -0.03  1.0000
   0  -1 -12  882957  153119                                                      996687   -3.47    0.03  1.0000
   0   1  13  150633   67909                                                      125505    2.27    0.05  1.0000
   0   1  13   36994   59070                                                       24962    2.27    0.05  1.0000
   0   1  13  167537   68949                                                      140993    2.27    0.05  1.0000
   0  -1 -13   11253   70037                                                        4947    2.27   -0.05  1.0000
   0  -1 -13  115311   66880                                                       92945    2.27   -0.05  1.0000
   0   1  14  127851   61741                                                      117753   -1.50   -0.08  1.0000
   0   1  14  134909   61905                                                      124543   -1.50   -0.08  1.0000
   0  -1 -14     657   64019                                                      -22532   -1.50    0.08  1.0000
   0  -1 -14     657   70109                                                      -64642   -1.50    0.08  1.0000
   0   1  14  117073   66602                                                      107401   -1.50   -0.08  1.0000
   0   1  15 2965824  237598                                                     2941292    0.42    0.06  1.0000
   0   1  15 2934446  332720                                                     2910044    0.42    0.06  1.0000
   0   1  15 2965146  330809                                                     2940617    0.42    0.06  1.0000
   0  -1 -15 2898049  294098                                                     2874795    0.42   -0.06  1.0000
   0  -1 -15 2968241  283643                                                     2944707    0.42   -0.06  1.0000
   0   1  16 1187125  159682                                                     1210111    0.62    0.01  1.0000
   0   1  16  755184  161817                                                      773539    0.62    0.01  1.0000
   0  -1 -16 1114255  180170                                                     1136540    0.62   -0.01  1.0000
   0   1  16 1005249  192487                                                     1026409    0.62    0.01  1.0000
   0  -1 -16  930786  172639                                                      951164    0.62   -0.01  1.0000
   0   1  17 2759762  337501                                                     2732007   -0.49   -0.02  1.0000
   0   1  17 2510960  234164                                                     2484489   -0.49   -0.02  1.0000
   0  -1 -17 2458870  286070                                                     2432852   -0.49    0.02  1.0000
   0   1  17 2492902  325099                                                     2466526   -0.49   -0.02  1.0000
   0  -1 -17 2759308  297443                                                     2731743   -0.49    0.02  1.0000
   0   1  18       2   82982                                                      -51804   -0.08    0.00  1.0000
   0  -1 -18   14286   61493                                                       14579   -0.08    0.00  1.0000
   0  -1 -18   58039   65915                                                       58628   -0.08    0.00  1.0000
   0   1  18       2   52413                                                      -13313   -0.08    0.00  1.0000
   0   1  18  223310  134207                                                      224420   -0.08    0.00  1.0000
   0   1  19      31  113216                                                      -67466   -0.33   -0.01  1.0000
   0  -1 -19  120587   67137                                                      116932   -0.33    0.01  1.0000
   0   1  19   92338  114712                                                       89106   -0.33   -0.01  1.0000
   0   1  19  311280   94966                                                      305324   -0.33   -0.01  1.0000
   0  -1 -19  230325  105631                                                      225265   -0.33    0.01  1.0000
   0  -1 -20 2676896  320225                                                     2603650    1.34   -0.02  1.0000
   0  -1 -20 2378757  304896                                                     2309739    1.34   -0.02  1.0000
   0   1  20 2508680  355472                                                     2437568    1.34    0.02  1.0000
   0   1  20 2596744  250047                                                     2524385    1.34    0.02  1.0000
   0   1  20 2552477  359924                                                     2480742    1.34    0.02  1.0000
   0   1  21   62283   85366                                                       76179   -1.67    0.00  1.0000
   0  -1 -21  235392   99721                                                      261793   -1.67    0.00  1.0000
   0   1  21  223168   96404                                                      248935   -1.67    0.00  1.0000
   0   1  21  230358  156566                                                      256527   -1.67    0.00  1.0000
   0  -1 -21   95914   95335                                                      112983   -1.67    0.00  1.0000
   0   1  22 3011204  427979                                                     3072301    1.04   -0.01  1.0000
   0   1  22 2571633  279528                                                     2628118    1.04   -0.01  1.0000
   0  -1 -22 2891634  360287                                                     2951672    1.04    0.01  1.0000
   0  -1 -22 2637478  345949                                                     2694830    1.04    0.01  1.0000
   0   1  22 2976656  420279                                                     3037404    1.04   -0.01  1.0000
   0  -1 -23  204093  102042                                                      207678   -0.23   -0.01  1.0000
   0   1  23  150023  100891                                                      153075   -0.23    0.01  1.0000
   0  -1 -23  244728  104081                                                      248652   -0.23   -0.01  1.0000
   0   1  23  282030  115969                                                      286209   -0.23    0.01  1.0000
   0   1  23  215690  134712                                                      219346   -0.23    0.01  1.0000
   0   1  24      16   63145                                                      -33208    0.23   -0.02  1.0000
   0   1  24   80323  109828                                                       82607    0.23   -0.02  1.0000
   0  -1 -24   74789   99318                                                       76986    0.23    0.02  1.0000
   0  -1 -24      16   75666                                                      -18541    0.23    0.02  1.0000
   0   1  25  101543   75815                                                      111325   -0.89    0.03  1.0000
   0   1  25  265105  104367                                                      280774   -0.89    0.03  1.0000
   0  -1 -25  224649  143728                                                      239172   -0.89   -0.03  1.0000
   0  -1 -25  141083  105101                                                      152640   -0.89   -0.03  1.0000
   0   1  25  230777  148876                                                      245411   -0.89    0.03  1.0000
   0   1  25  195149  166912                                                      208624   -0.89    0.03  1.0000
   0   1  26 1848963  280730                                                     1816228    0.72   -0.01  1.0000
   0   1  26 2193569  398104                                                     2157901    0.72   -0.01  1.0000
   0   1  26 1508481  336888                                                     1478928    0.72   -0.01  1.0000
   0  -1 -26 1992357  332658                                                     1958272    0.72    0.01  1.0000
   0  -1 -26 1494003  285543                                                     1464507    0.72    0.01  1.0000
   0  -1 -27 1726498  325886                                                     1750405    0.54    0.02  1.0000
   0   1  27 2070155  402629                                                     2096041    0.54   -0.02  1.0000
   0  -1 -27 1931376  345746                                                     1956658    0.54    0.02  1.0000
   0   1  27 1563101  352727                                                     1585605    0.54   -0.02  1.0000
   0   1  28  375968  191890                                                      354345   -1.06    0.03  1.0000
   0  -1 -28  571606  199783                                                      544771   -1.06   -0.03  1.0000
   0  -1 -28  598158  206157                                                      570699   -1.06   -0.03  1.0000
   0  -1 -29  619894  215442                                                      614433    0.20    0.03  1.0000
   0  -1 -29 1231814  280734                                                     1224111    0.20    0.03  1.0000
   0   1  29  739378  249717                                                      733609    0.20   -0.03  1.0000
   0  -1 -30      44   97387                                                      -17828    0.39   -0.04  1.0000
   0  -1 -31  109679  111624                                                      109424    0.02    0.05  1.0000
   0  -1 -32  528232  216001                                                      520463   -0.31   -0.05  1.0000
   0   2 -30  167047  121767                                                      166594    0.03    0.03  1.0000
   0  -2  29 1573536  356991                                                     1586936    0.31    0.03  1.0000
   0   2 -29 1073467  279067                                                     1084287    0.31   -0.03  1.0000
   0   2 -29 1332716  284091                                                     1344769    0.31   -0.03  1.0000
   0   2 -28  233402  134104                                                      220867   -0.78   -0.01  1.0000
   0   2 -28     175   85737                                                       -2212   -0.78   -0.01  1.0000
   0  -2  28   28375   68090                                                       24109   -0.78    0.01  1.0000
   0  -2  28  195369  140974                                                      183893   -0.78    0.01  1.0000
   0   2 -27  303373  157067                                                      307499   -0.22    0.01  1.0000
   0   2 -27  513785  174323                                                      519150   -0.22    0.01  1.0000
   0  -2  27  548288  170232                                                      553939   -0.22   -0.01  1.0000
   0  -2  27  753941  254074                                                      760566   -0.22   -0.01  1.0000
   0  -2  26   74365   86885                                                       88691    1.50   -0.02  1.0000
   0   2 -26   95383   88865                                                      111591    1.50    0.02  1.0000
   0  -2  26  208582  158664                                                      232162    1.50   -0.02  1.0000
   0   2 -26   99943  120457                                                      116520    1.50    0.02  1.0000
   0  -2  25  190168   87024                                                      203369   -0.89    0.04  1.0000
   0  -2  25  341341  169933                                                      358955   -0.89    0.04  1.0000
   0   2 -25  570644  177616                                                      593659   -0.89   -0.04  1.0000
   0   2 -25  247113  109590                                                      262334   -0.89   -0.04  1.0000
   0   2 -24  573214  152643                                                      557933   -0.61    0.02  1.0000
   0  -2  24  218404  124542                                                      208882   -0.61   -0.02  1.0000
   0  -2  24  308678  102770                                                      297339   -0.61   -0.02  1.0000
   0   2 -24  601294  193268                                                      585641   -0.61    0.02  1.0000
   0  -2  23 1368140  293590                                                     1393421    0.63    0.02  1.0000
   0  -2  23 1964901  277082                                                     1995175    0.63    0.02  1.0000
   0   2 -23 1487804  257925                                                     1513981    0.63   -0.02  1.0000
   0   2 -23 1627750  302998                                                     1655126    0.63   -0.02  1.0000
   0  -2  22 3686955  356024                                                     3643481    0.68   -0.02  1.0000
   0  -2  22 3591548  433817                                                     3548642    0.68   -0.02  1.0000
   0   2 -22 2952697  352737                                                     2913449    0.68    0.02  1.0000
   0   2 -22 3539459  393216                                                     3496477    0.68    0.02  1.0000
   0  -2  21  998703  195993                                                     1043334   -1.30   -0.01  1.0000
   0   2 -21 1029441  210229                                                     1074739   -1.30    0.01  1.0000
   0  -2  21  697241  208071                                                      734613   -1.30   -0.01  1.0000
   0   2 -21  892696  215209                                                      934911   -1.30    0.01  1.0000
   0  -2  20   12860   62457                                                       13887    0.26    0.04  1.0000
   0   2 -20      20   68500                                                      -36222    0.26   -0.04  1.0000
   0  -2  20    7262   94286                                                        8039    0.26    0.04  1.0000
   0   2 -20   17029   70863                                                       18081    0.26   -0.04  1.0000
   0   2 -19  284703  118693                                                      310905    1.42    0.05  1.0000
   0  -2  19  276573  105914                                                      302096    1.42   -0.05  1.0000
   0   2 -19  317933  130494                                                      345590    1.42    0.05  1.0000
   0  -2  19  379784  125325                                                      409600    1.42   -0.05  1.0000
   0  -2  19  357189  145632                                                      386121    1.42   -0.05  1.0000
   0   2 -18 1121292  191772                                                     1050300   -2.01   -0.06  1.0000
   0  -2  18 1210556  223300                                                     1137157   -2.01    0.06  1.0000
   0   2 -18 1139374  206655                                                     1067802   -2.01   -0.06  1.0000
   0  -2  18 1176238  228397                                                     1103903   -2.01    0.06  1.0000
   0  -2  18 1178723  183242                                                     1106310   -2.01    0.06  1.0000
   0  -2  17 3947104  381638                                                     3865289    1.25   -0.08  1.0000
   0  -2  17 3551255  310326                                                     3473672    1.25   -0.08  1.0000
   0  -2  17 3323114  360098                                                     3248078    1.25   -0.08  1.0000
   0   2 -17 3778952  361204                                                     3697241    1.25    0.08  1.0000
   0   2 -17 3837880  340967                                                     3755530    1.25    0.08  1.0000
   0   2 -16  447024  112473                                                      433096   -0.62   -0.06  1.0000
   0  -2  16  575401  177876                                                      559587   -0.62    0.06  1.0000
   0  -2  16  612625  133179                                                      596304   -0.62    0.06  1.0000
   0  -2  16  393595  125655                                                      380535   -0.62    0.06  1.0000
   0   2 -16  369878  128036                                                      357218   -0.62   -0.06  1.0000
   0   2 -15 9112431  494554                                                     9165001    0.51    0.00  1.0000
   0  -2  15 9114041  562653                                                     9166577    0.51    0.00  1.0000
   0  -2  15 9126841  544556                                                     9179412    0.51    0.00  1.0000
   0  -2  15 9152644  463758                                                     9205289    0.51    0.00  1.0000
   0   2 -15 8682582  520067                                                     8733899    0.51    0.00  1.0000
   0  -2  14  235993  119512                                                      230912    0.33   -0.02  1.0000
   0   2 -14      32   52875                                                      -12539    0.33    0.02  1.0000
   0  -2  14   43952   43322                                                       41772    0.33   -0.02  1.0000
   0   2 -14  114622   83504                                                      110960    0.33    0.02  1.0000
   0  -2  14   15791   48048                                                       14494    0.33   -0.02  1.0000
   0   2 -13 1536669  218981                                                     1619544   -1.94   -0.01  1.0000
   0  -2  13 1577105  229024                                                     1661054   -1.94    0.01  1.0000
   0  -2  13 1469298  227437                                                     1550366   -1.94    0.01  1.0000
   0  -2  13 1385823  183101                                                     1464585   -1.94    0.01  1.0000
   0  -2  13 1467336  179451                                                     1548350   -1.94    0.01  1.0000
   0   2 -13 1411831  191655                                                     1491313   -1.94   -0.01  1.0000
   0   2 -1211622981  524847                                                    11306897    2.75    0.04  1.0000
   0  -2  1211969484  467236                                                    11649314    2.75   -0.04  1.0000
   0  -2  1211715297  567036                                                    11398567    2.75   -0.04  1.0000
   0  -2  1212763453  514868                                                    12432763    2.75   -0.04  1.0000
   0  -2  1211463849  536564                                                    11150559    2.75   -0.04  1.0000
   0   2 -1212057978  492654                                                    11735994    2.75    0.04  1.0000
   0  -2  11  341473  100159                                                      379533   -1.89    0.07  1.0000
   0   2 -11  443382  120841                                                      487077   -1.89   -0.07  1.0000
   0   2 -11  354248   99203                                                      393412   -1.89   -0.07  1.0000
   0   2 -11  344775   98495                                                      383427   -1.89   -0.07  1.0000
   0  -2  11  499516  142198                                                      545344   -1.89    0.07  1.0000
   0  -2  11  319946   89036                                                      356817   -1.89    0.07  1.0000
   0  -2  11  535668  119716                                                      583091   -1.89    0.07  1.0000
   0   2 -11  398531   93726                                                      440011   -1.89   -0.07  1.0000
   0  -2  11  427459  130815                                                      469926   -1.89    0.07  1.0000
   0  -2  1026296800  650600                                                    26263860   -0.18   -0.06  1.0000
   0  -2  1027826196  701813                                                    27792310   -0.18   -0.06  1.0000
   0   2 -1027106102  682010                                                    27074604   -0.18    0.06  1.0000
   0  -2  1024309026  741428                                                    24277352   -0.18   -0.06  1.0000
   0   2 -1027849088  669049                                                    27817160   -0.18    0.06  1.0000
   0   2 -1028844514  785963                                                    28812028   -0.18    0.06  1.0000
   0  -2  1027578232  753202                                                    27544498   -0.18   -0.06  1.0000
   0  -2  1028227072  691918                                                    28192938   -0.18   -0.06  1.0000
   0   2 -1028819164  816071                                                    28786688   -0.18    0.06  1.0000
   0   2 -1026307216  716957                                                    26276186   -0.18    0.06  1.0000
   0  -2  1025810656  733842                                                    25778018   -0.18   -0.06  1.0000
   0  -2  1028475812  722900                                                    28441532   -0.18   -0.06  1.0000
   0  -2   9 3752143  233259                                                     3645966    1.62    0.04  1.0000
   0  -2   9 3643098  237865                                                     3538487    1.62    0.04  1.0000
   0   2  -9 3500125  271882                                                     3397969    1.62   -0.04  1.0000
   0   2  -9 3552688  231707                                                     3449762    1.62   -0.04  1.0000
   0  -2   9 3956832  255104                                                     3847777    1.62    0.04  1.0000
   0  -2   9 3716452  255591                                                     3610785    1.62    0.04  1.0000
   0  -2   9 3384671  261719                                                     3283865    1.62    0.04  1.0000
   0  -2   9 3372076  249202                                                     3271460    1.62    0.04  1.0000
   0   2  -9 3735988  268848                                                     3630421    1.62   -0.04  1.0000
   0   2  -9 3830422  233861                                                     3723519    1.62   -0.04  1.0000
   0   2  -9 3537101  247630                                                     3434402    1.62   -0.04  1.0000
   0  -2   9 3879036  244934                                                     3771066    1.62    0.04  1.0000
   0   2  -8 6184274  152783                                                     6228484   -0.53    0.05  1.0000
   0   2  -8 6696391  356965                                                     6742393   -0.53    0.05  1.0000
   0  -2   8 6406484  292808                                                     6452307   -0.53   -0.05  1.0000
   0   2  -8 6122323  317972                                                     6166311   -0.53    0.05  1.0000
   0   2  -8 6253946  296204                                                     6298405   -0.53    0.05  1.0000
   0   2  -8 6760127  301380                                                     6806347   -0.53    0.05  1.0000
   0  -2   8 6146481  333316                                                     6191366   -0.53   -0.05  1.0000
   0   2  -8 7175257  347974                                                     7222872   -0.53    0.05  1.0000
   0   2  -8 5757071  323989                                                     5799729   -0.53    0.05  1.0000
   0  -2   8 6499019  324632                                                     6545171   -0.53   -0.05  1.0000
   0  -2   8 6994825  340020                                                     7042702   -0.53   -0.05  1.0000
   0  -2   8 6925699  313135                                                     6973338   -0.53   -0.05  1.0000
   0  -2   8 7125575  316136                                                     7173897   -0.53   -0.05  1.0000
   0  -2   8 6835533  318718                                                     6882862   -0.53   -0.05  1.0000
   0   2  -7 2920235  187742                                                     2885224   -0.60   -0.04  1.0000
   0   2  -7 3078884  191796                                                     3042931   -0.60   -0.04  1.0000
   0  -2   7 3150653  201348                                                     3114447   -0.60    0.04  1.0000
   0   2  -7 2808969  209805                                                     2774633   -0.60   -0.04  1.0000
   0   2  -7 2990961  223086                                                     2955527   -0.60   -0.04  1.0000
   0  -2   7 2811243  207551                                                     2777049   -0.60    0.04  1.0000
   0  -2   7 2810958  186545                                                     2776766   -0.60    0.04  1.0000
   0  -2   7 2857024  186600                                                     2822552   -0.60    0.04  1.0000
   0   2  -7 2924979  107401                                                     2889939   -0.60   -0.04  1.0000
   0   2  -7 2612250  194578                                                     2579142   -0.60   -0.04  1.0000
   0   2  -7 2990036  208143                                                     2954607   -0.60   -0.04  1.0000
   0  -2   7 3162117  209584                                                     3125845   -0.60    0.04  1.0000
   0  -2   7 3366090  218617                                                     3328663   -0.60    0.04  1.0000
   0  -2   7 3027803  196351                                                     2992312   -0.60    0.04  1.0000
   0   2  -6  146296   40513                                                      117606   -2.36   -0.01  1.0000
   0   2  -6   94674   54705                                                       71892   -2.36   -0.01  1.0000
   0   2  -6  116245   44279                                                       90836   -2.36   -0.01  1.0000
   0   2  -6  256119   62764                                                      217669   -2.36   -0.01  1.0000
   0  -2   6  154293   46484                                                      124737   -2.36    0.01  1.0000
   0  -2   6   98245   35754                                                       74970   -2.36    0.01  1.0000
   0  -2   6   99230   34260                                                       75830   -2.36    0.01  1.0000
   0  -2   6  162655   46072                                                      132267   -2.36    0.01  1.0000
   0   2  -6  114029   43760                                                       88878   -2.36   -0.01  1.0000
   0  -2   6   84705   37167                                                       63202   -2.36    0.01  1.0000
   0  -2   6  152141   44164                                                      122801   -2.36    0.01  1.0000
   0   2  -6  101662   46103                                                       77999   -2.36   -0.01  1.0000
   0   2  -5 7732852  314613                                                     8182187    4.71    0.07  1.0000
   0  -2   5 7903859  279663                                                     8356448    4.71   -0.07  1.0000
   0   2  -5 7080628  280537                                                     7510864    4.71    0.07  1.0000
   0   2  -5 7083363  300507                                                     7513682    4.71    0.07  1.0000
   0  -2   5 7712217  264403                                                     8159362    4.71   -0.07  1.0000
   0   2  -5 7329410  271354                                                     7767031    4.71    0.07  1.0000
   0  -2   5 7398564  304931                                                     7836649    4.71   -0.07  1.0000
   0   2  -5 7622911  282432                                                     8069082    4.71    0.07  1.0000
   0  -2   5 8002696  289668                                                     8458067    4.71   -0.07  1.0000
   0  -2   5 7572056  270017                                                     8015175    4.71   -0.07  1.0000
   0   2  -5 7942092  280206                                                     8397381    4.71    0.07  1.0000
   0  -2   5 7453606  298073                                                     7893295    4.71   -0.07  1.0000
   0   2  -4  783622   76352                                                      700665    2.84   -0.07  1.0000
   0   2  -4  641861   70086                                                      567001    2.84   -0.07  1.0000
   0   2  -4  756551   85393                                                      675080    2.84   -0.07  1.0000
   0  -2   4  743670   75066                                                      662801    2.84    0.07  1.0000
   0   2  -4  712202   73722                                                      633224    2.84   -0.07  1.0000
   0   2  -4  681072   69784                                                      603890    2.84   -0.07  1.0000
   0  -2   4  757058   77253                                                      675444    2.84    0.07  1.0000
   0  -2   4  654134   67179                                                      578434    2.84    0.07  1.0000
   0   2  -4  701948   68103                                                      623557    2.84   -0.07  1.0000
   0  -2   4  756428   75862                                                      674849    2.84    0.07  1.0000
   0  -2   4  769023   87214                                                      686747    2.84    0.07  1.0000
   0   2  -4  766550   83509                                                      684526    2.84   -0.07  1.0000
   0  -2   326493966  422271                                                    29518874  -16.88   -0.05  1.0000
   0   2  -326545314  445402                                                    29571508  -16.88    0.05  1.0000
   0  -2   326212796  446800                                                    29222048  -16.88   -0.05  1.0000
   0  -2   326864214  443361                                                    29909620  -16.88   -0.05  1.0000
   0   2  -326921800  447806                                                    29968810  -16.88    0.05  1.0000
   0  -2   326172866  401694                                                    29179880  -16.88   -0.05  1.0000
   0   2  -326130146  422852                                                    29133214  -16.88    0.05  1.0000
   0  -2   326934684  449300                                                    29983974  -16.88   -0.05  1.0000
   0   2  -325743762  475458                                                    28725152  -16.88    0.05  1.0000
   0   2  -2 6779734  222723                                                     9193823   25.24   -0.03  1.0000
   0   2  -2 6402424  186151                                                     8753534   25.24   -0.03  1.0000
   0   2  -2 6448778  211020                                                     8807724   25.24   -0.03  1.0000
   0  -2   2 6178047  217301                                                     8491115   25.24    0.03  1.0000
   0  -2   2 6543841  209097                                                     8919068   25.24    0.03  1.0000
   0   2  -2 6188997  213451                                                     8503658   25.24   -0.03  1.0000
   0  -2   2 6421497  184468                                                     8776133   25.24    0.03  1.0000
   0  -2   2 6752116  218875                                                     9161959   25.24    0.03  1.0000
   0  -2  -258782120  538541                                                    53757288   19.77   -0.07  1.0000
   0  -2  -258516632  498439                                                    53503412   19.77   -0.07  1.0000
   0  -2  -258444296  589425                                                    53434244   19.77   -0.07  1.0000
   0  -2  -258037252  611534                                                    53045060   19.77   -0.07  1.0000
   0   2   261398432  606327                                                    56257812   19.77    0.07  1.0000
   0   2   258219096  610911                                                    53216268   19.77    0.07  1.0000
   0   2   259729324  517263                                                    54660584   19.77    0.07  1.0000
   0   2   3 6994102  238747                                                     6670808   -3.65   -0.04  1.0000
   0   2   3 6843249  219950                                                     6523500   -3.65   -0.04  1.0000
   0  -2  -3 6793334  200458                                                     6475445   -3.65    0.04  1.0000
   0  -2  -3 6372186  216357                                                     6064427   -3.65    0.04  1.0000
   0  -2  -3 6270387  184341                                                     5965126   -3.65    0.04  1.0000
   0   2   3 6892826  195388                                                     6571908   -3.65   -0.04  1.0000
   0   2   3 6763842  198239                                                     6445977   -3.65   -0.04  1.0000
   0  -2  -3 6569549  233855                                                     6257002   -3.65    0.04  1.0000
   0  -2  -417869344  419423                                                    17383132   -3.41   -0.02  1.0000
   0  -2  -418402250  364555                                                    17908792   -3.41   -0.02  1.0000
   0   2   418399706  358473                                                    17906834   -3.41    0.02  1.0000
   0  -2  -416997692  389750                                                    16523568   -3.41   -0.02  1.0000
   0   2   416769120  436636                                                    16298746   -3.41    0.02  1.0000
   0  -2  -417874900  353081                                                    17388610   -3.41   -0.02  1.0000
   0   2   417588370  391668                                                    17106558   -3.41    0.02  1.0000
   0   2   417444916  417181                                                    16965090   -3.41    0.02  1.0000
   0   2   417701852  350888                                                    17218478   -3.41    0.02  1.0000
   0   2   5   78108   30707                                                       47243    4.21   -0.03  1.0000
   0   2   5    5121   23194                                                       -2076    4.21   -0.03  1.0000
   0  -2  -5  136111   36657                                                       94251    4.21    0.03  1.0000
   0   2   5  138016   34019                                                       96164    4.21   -0.03  1.0000
   0   2   5   28723   31873                                                       11115    4.21   -0.03  1.0000
   0  -2  -5   89437   26160                                                       55998    4.21    0.03  1.0000
   0   2   5   79373   32651                                                       48237    4.21   -0.03  1.0000
   0  -2  -5  123742   37705                                                       83948    4.21    0.03  1.0000
   0   2   6 3256350  197515                                                     3764677   -7.98    0.05  1.0000
   0   2   6 2995285  241941                                                     3483563   -7.98    0.05  1.0000
   0  -2  -6 2765613  202218                                                     3235614   -7.98   -0.05  1.0000
   0  -2  -6 3292812  197920                                                     3803977   -7.98   -0.05  1.0000
   0   2   6 3246842  188636                                                     3754454   -7.98    0.05  1.0000
   0   2   6 3146292  211193                                                     3646270   -7.98    0.05  1.0000
   0   2   6 3051803  143697                                                     3544494   -7.98    0.05  1.0000
   0   2   6 3142840  223474                                                     3642552   -7.98    0.05  1.0000
   0  -2  -6 3062014  220171                                                     3555598   -7.98   -0.05  1.0000
   0   2   7  248098   72210                                                      205647   13.16   -0.05  1.0000
   0   2   7  154069   31833                                                      109559   13.16   -0.05  1.0000
   0   2   7  176986   45294                                                      133043   13.16   -0.05  1.0000
   0  -2  -7  155343   49339                                                      109789   13.16    0.05  1.0000
   0   2   7  193952   34883                                                      150396   13.16   -0.05  1.0000
   0   2   7  239341   69506                                                      196722   13.16   -0.05  1.0000
   0  -2  -7  127614   42557                                                       81432   13.16    0.05  1.0000
   0  -2  -7  211325   45940                                                      166822   13.16    0.05  1.0000
   0   2   7  151810   32037                                                      107241   13.16   -0.05  1.0000
   0  -2  -7  163425   46766                                                      118037   13.16    0.05  1.0000
   0   2   8  639966   72402                                                      324585  -13.68    0.02  1.0000
   0   2   8  903595   94414                                                      519078  -13.68    0.02  1.0000
   0   2   8  761045   87421                                                      412423  -13.68    0.02  1.0000
   0   2   8  808349   60960                                                      447469  -13.68    0.02  1.0000
   0   2   8  759348   79806                                                      411173  -13.68    0.02  1.0000
   0  -2  -8  688884   78992                                                      359620  -13.68   -0.02  1.0000
   0  -2  -8  682331   84905                                                      354885  -13.68   -0.02  1.0000
   0   2   8  659831   90675                                                      338792  -13.68    0.02  1.0000
   0  -2  -8  788958  100367                                                      432943  -13.68   -0.02  1.0000
   0  -2  -9 2471637  219844                                                     3049427   10.38   -0.03  1.0000
   0   2   9 2810401  255309                                                     3425068   10.38    0.03  1.0000
   0   2   9 2399284  219503                                                     2969468   10.38    0.03  1.0000
   0   2   9 2399029  172405                                                     2969184   10.38    0.03  1.0000
   0   2   9 2353576  198876                                                     2918585   10.38    0.03  1.0000
   0   2   9 2900363  246108                                                     3524320   10.38    0.03  1.0000
   0   2   9 2247079  260310                                                     2799835   10.38    0.03  1.0000
   0  -2  -9 2504788  269468                                                     3086242   10.38   -0.03  1.0000
   0  -2  -9 2541681  249684                                                     3127185   10.38   -0.03  1.0000
   0   2  10 2634651  251057                                                     3041258   -7.18   -0.04  1.0000
   0  -2 -10 2487014  244982                                                     2881829   -7.18    0.04  1.0000
   0   2  10 2715174  237568                                                     3127733   -7.18   -0.04  1.0000
   0  -2 -10 2507846  226566                                                     2904252   -7.18    0.04  1.0000
   0   2  10 2477931  206578                                                     2872691   -7.18   -0.04  1.0000
   0   2  10 2865433  249503                                                     3288865   -7.18   -0.04  1.0000
   0   2  10 2462006  180577                                                     2855541   -7.18   -0.04  1.0000
   0   2  10 2465113  270294                                                     2858887   -7.18   -0.04  1.0000
   0  -2 -11 1055978  157336                                                     1248383    5.28   -0.04  1.0000
   0   2  11 1174294  177945                                                     1376662    5.28    0.04  1.0000
   0   2  11  905247  150437                                                     1083906    5.28    0.04  1.0000
   0   2  11 1018994  181317                                                     1208056    5.28    0.04  1.0000
   0  -2 -11  976454  161490                                                     1161781    5.28   -0.04  1.0000
   0   2  11 1094832  128774                                                     1290510    5.28    0.04  1.0000
   0   2  11 1005017  174762                                                     1192834    5.28    0.04  1.0000
   0   2  12    5168   65662                                                      -32655   -4.23   -0.08  1.0000
   0  -2 -12    5168   62855                                                      -47098   -4.23    0.08  1.0000
   0  -2 -12   24879   41488                                                       52125   -4.23    0.08  1.0000
   0   2  12    1674   46307                                                        1015   -4.23   -0.08  1.0000
   0   2  12    5168   63014                                                      -44966   -4.23   -0.08  1.0000
   0   2  12   39191   38120                                                       72001   -4.23   -0.08  1.0000
   0   2  12     313   15205                                                        6910   -4.23   -0.08  1.0000
   0   2  13   39281   88255                                                       27216    3.21    0.10  1.0000
   0   2  13    2975   53269                                                      -10686    3.21    0.10  1.0000
   0   2  13   22117   16593                                                       12887    3.21    0.10  1.0000
   0  -2 -13  106391   53632                                                       89703    3.21   -0.10  1.0000
   0  -2 -13   82754   49601                                                       67853    3.21   -0.10  1.0000
   0   2  13   48460   34544                                                       35154    3.21    0.10  1.0000
   0  -2 -14 9297664  505052                                                     9133431   -1.60    0.03  1.0000
   0   2  1410068427  590302                                                     9896824   -1.60   -0.03  1.0000
   0   2  14 9477990  567748                                                     9311517   -1.60   -0.03  1.0000
   0   2  14 9475779  250329                                                     9309325   -1.60   -0.03  1.0000
   0   2  1410063889  405635                                                     9892324   -1.60   -0.03  1.0000
   0  -2 -14 9552240  493447                                                     9385762   -1.60    0.03  1.0000
   0  -2 -15  848157  160768                                                      836273    0.38    0.05  1.0000
   0   2  15  869550   74319                                                      858044    0.38   -0.05  1.0000
   0   2  15  902042  203208                                                      890323    0.38   -0.05  1.0000
   0  -2 -15 1094684  190661                                                     1081176    0.38    0.05  1.0000
   0   2  15  772788   70253                                                      761943    0.38   -0.05  1.0000
   0   2  15  940685  136637                                                      928717    0.38   -0.05  1.0000
   0   2  15  931993  194276                                                      920080    0.38   -0.05  1.0000
   0   2  16 4765542  305570                                                     4791175   -0.35    0.06  1.0000
   0  -2 -16 4551683  367746                                                     4577585   -0.35   -0.06  1.0000
   0  -2 -16 4132308  367049                                                     4156989   -0.35   -0.06  1.0000
   0   2  16 4447328  429318                                                     4472091   -0.35    0.06  1.0000
   0   2  16 4608202  441674                                                     4633409   -0.35    0.06  1.0000
   0   2  16 3665520  146174                                                     3688005   -0.35    0.06  1.0000
   0   2  16 3839655  146840                                                     3862667   -0.35    0.06  1.0000
   0   2  17 2116072  312516                                                     2125186    0.19   -0.04  1.0000
   0   2  17 1879321  201140                                                     1887910    0.19   -0.04  1.0000
   0  -2 -17 1389510  216913                                                     1397384    0.19    0.04  1.0000
   0  -2 -17 1594693  233147                                                     1603127    0.19    0.04  1.0000
   0   2  17 1628883  261592                                                     1636880    0.19   -0.04  1.0000
   0  -2 -18  149110   86208                                                      136216    1.01   -0.03  1.0000
   0  -2 -18   80572   71953                                                       71171    1.01   -0.03  1.0000
   0   2  18  148138   57781                                                      135216    1.01    0.03  1.0000
   0   2  18  230067  120769                                                      213891    1.01    0.03  1.0000
   0   2  18   22159   63696                                                       17342    1.01    0.03  1.0000
   0   2  18   81266   58128                                                       71772    1.01    0.03  1.0000
   0   2  19   55358   45345                                                       41257   -1.90   -0.02  1.0000
   0  -2 -19   40122   63676                                                       28304   -1.90    0.02  1.0000
   0  -2 -19    1046   69576                                                      -41445   -1.90    0.02  1.0000
   0   2  19   64653   91001                                                       49331   -1.90   -0.02  1.0000
   0   2  19    1046   76569                                                      -40596   -1.90   -0.02  1.0000
   0   2  19  136717   64449                                                      113971   -1.90   -0.02  1.0000
   0   2  20  290587  145895                                                      317731    1.45    0.00  1.0000
   0   2  20  224757  125595                                                      248701    1.45    0.00  1.0000
   0  -2 -20  160290  120380                                                      180613    1.45    0.00  1.0000
   0   2  20  343460  104362                                                      372916    1.45    0.00  1.0000
   0   2  20  282703   95845                                                      309484    1.45    0.00  1.0000
   0  -2 -20  374340  145408                                                      405078    1.45    0.00  1.0000
   0   2  21  232319   97888                                                      240383   -0.50    0.00  1.0000
   0   2  21  449800  166849                                                      460997   -0.50    0.00  1.0000
   0  -2 -21  422963  146346                                                      433829   -0.50    0.00  1.0000
   0   2  21  209268  132839                                                      216926   -0.50    0.00  1.0000
   0   2  21  486718  113441                                                      498362   -0.50    0.00  1.0000
   0  -2 -21  375467  134673                                                      385709   -0.50    0.00  1.0000
   0   2  22       7   75959                                                      -47482    0.16    0.01  1.0000
   0   2  22   39864   77477                                                       40803    0.16    0.01  1.0000
   0  -2 -22   57618   61947                                                       58671    0.16   -0.01  1.0000
   0  -2 -22  122595   92330                                                      124130    0.16   -0.01  1.0000
   0   2  22  294700  146035                                                      297246    0.16    0.01  1.0000
   0   2  22  176722   80822                                                      178695    0.16    0.01  1.0000
   0   2  23      90  154881                                                      -99530   -0.56    0.00  1.0000
   0  -2 -23   24448   91384                                                       27474   -0.56    0.00  1.0000
   0   2  23  118268   78644                                                      124809   -0.56    0.00  1.0000
   0   2  23   30690   77795                                                       34065   -0.56    0.00  1.0000
   0   2  23      90   68212                                                      -34901   -0.56    0.00  1.0000
   0  -2 -23   56997   67584                                                       61571   -0.56    0.00  1.0000
   0   2  24   65717  105383                                                       58315    0.90    0.00  1.0000
   0  -2 -24   53373   68639                                                       46720    0.90    0.00  1.0000
   0   2  24   85922   46593                                                       77430    0.90    0.00  1.0000
   0  -2 -24   36998   77745                                                       31493    0.90    0.00  1.0000
   0   2  24   10355  107785                                                        7542    0.90    0.00  1.0000
   0   2  24   18092   72684                                                       14307    0.90    0.00  1.0000
   0  -2 -25  271354  127196                                                      266242   -0.29    0.02  1.0000
   0   2  25  328370  109113                                                      322662   -0.29   -0.02  1.0000
   0   2  25   97477  107538                                                       94379   -0.29   -0.02  1.0000
   0  -2 -25  422607  140954                                                      416221   -0.29    0.02  1.0000
   0   2  25  387814  191766                                                      381610   -0.29   -0.02  1.0000
   0   2  26     185  148795                                                      -23753   -0.80    0.04  1.0000
   0  -2 -26  117574  111370                                                      109014   -0.80   -0.04  1.0000
   0   2  26     185   97729                                                      -45709   -0.80    0.04  1.0000
   0  -2 -26   30039   86396                                                       25781   -0.80   -0.04  1.0000
   0   2  26     185  145634                                                      -82045   -0.80    0.04  1.0000
   0  -2 -27   92598  128507                                                      102994    1.07    0.05  1.0000
   0   2  27  104424  146390                                                      114946    1.07   -0.05  1.0000
   0   2  27  200019  189262                                                      214516    1.07   -0.05  1.0000
   0  -2 -27     333  104832                                                       -1969    1.07    0.05  1.0000
   0  -2 -28     162  101882                                                      -33649   -0.75   -0.05  1.0000
   0   2  28   16932  122196                                                       20364   -0.75    0.05  1.0000
   0  -2 -28  143442  141964                                                      152864   -0.75   -0.05  1.0000
   0   2  28  182331  167278                                                      193241   -0.75    0.05  1.0000
   0   2  29  452632  216296                                                      431596    0.96   -0.05  1.0000
   0  -2 -29  608620  214436                                                      583650    0.96    0.05  1.0000
   0   2  29  538866  209911                                                      515892    0.96   -0.05  1.0000
   0  -2 -29  601320  224858                                                      576502    0.96    0.05  1.0000
   0  -2 -30  473105  185072                                                      445769   -1.20   -0.04  1.0000
   0  -2 -31   40652  117208                                                       43030    0.34    0.02  1.0000
   0  -2 -32  224289  153352                                                      211032    0.85   -0.01  1.0000
   0  -3  29   76313   88274                                                       94614    2.34    0.01  1.0000
   0  -3  29  220477  190239                                                      251305    2.34    0.01  1.0000
   0   3 -29   21008   91720                                                       30740    2.34   -0.01  1.0000
   0  -3  29    1589   85841                                                      -19937    2.34    0.01  1.0000
   0   3 -29  231095  170298                                                      262595    2.34   -0.01  1.0000
   0   3 -28  192273  161903                                                      180191   -0.87    0.00  1.0000
   0  -3  28  125724  104936                                                      115994   -0.87    0.00  1.0000
   0  -3  28  255943  168541                                                      241986   -0.87    0.00  1.0000
   0  -3  28   40502   74422                                                       35054   -0.87    0.00  1.0000
   0   3 -28  208417  113214                                                      195831   -0.87    0.00  1.0000
   0  -3  27  358336  172873                                                      368749   -0.52    0.02  1.0000
   0   3 -27  366135  167969                                                      376824   -0.52   -0.02  1.0000
   0  -3  27  231832  116661                                                      240221   -0.52    0.02  1.0000
   0   3 -27  362546  156118                                                      373182   -0.52   -0.02  1.0000
   0   3 -26      10  122153                                                     -105539    0.19    0.03  1.0000
   0  -3  26   94335   99944                                                       96283    0.19   -0.03  1.0000
   0   3 -26      10  113167                                                      -89420    0.19    0.03  1.0000
   0  -3  26      10  102804                                                     -105640    0.19   -0.03  1.0000
   0  -3  25   46693   67980                                                       48542    0.25    0.04  1.0000
   0   3 -25    3643   58231                                                        4152    0.25   -0.04  1.0000
   0  -3  25  189739  141307                                                      193448    0.25    0.04  1.0000
   0   3 -25  123813  114273                                                      126707    0.25   -0.04  1.0000
   0   3 -24     180  126064                                                     -137515    0.79    0.07  1.0000
   0  -3  24     180  124675                                                     -172780    0.79   -0.07  1.0000
   0   3 -24     180   98291                                                      -97054    0.79    0.07  1.0000
   0  -3  24   28966   98047                                                       33624    0.79   -0.07  1.0000
   0   3 -23  193697   65538                                                      225276   -2.05   -0.07  1.0000
   0  -3  23  258811  158839                                                      295381   -2.05    0.07  1.0000
   0   3 -23   27676   92961                                                       40339   -2.05   -0.07  1.0000
   0  -3  23  166778  108684                                                      196372   -2.05    0.07  1.0000
   0  -3  22  818923  174058                                                      758222    2.07   -0.03  1.0000
   0   3 -22  686383  180731                                                      630543    2.07    0.03  1.0000
   0   3 -22  666624  166807                                                      611610    2.07    0.03  1.0000
   0  -3  22  677694  194183                                                      622573    2.07   -0.03  1.0000
   0   3 -21  660507  181241                                                      625982   -1.27    0.00  1.0000
   0   3 -21  882420  198795                                                      842442   -1.27    0.00  1.0000
   0  -3  21  865353  182727                                                      825754   -1.27    0.00  1.0000
   0  -3  21  767885  216302                                                      730609   -1.27    0.00  1.0000
   0  -3  20 1522918  233530                                                     1548810    0.62    0.01  1.0000
   0  -3  20 1305817  269362                                                     1329800    0.62    0.01  1.0000
   0   3 -20 1486625  271392                                                     1512142    0.62   -0.01  1.0000
   0   3 -20 1397392  236994                                                     1422135    0.62   -0.01  1.0000
   0   3 -19  243277   88612                                                      248555   -0.33    0.02  1.0000
   0   3 -19  256161  112297                                                      261575   -0.33    0.02  1.0000
   0  -3  19  172523  124440                                                      177148   -0.33   -0.02  1.0000
   0  -3  19  281395  109770                                                      287294   -0.33   -0.02  1.0000
   0  -3  18 1748626  271946                                                     1740730   -0.18    0.04  1.0000
   0  -3  18 1664649  221496                                                     1656945   -0.18    0.04  1.0000
   0   3 -18 1232751  222341                                                     1225940   -0.18   -0.04  1.0000
   0   3 -18 1675149  232820                                                     1667208   -0.18   -0.04  1.0000
   0   3 -17   67574   46178                                                       56790    1.30    0.04  1.0000
   0   3 -17  113861   68589                                                       99728    1.30    0.04  1.0000
   0  -3  17  196499  116026                                                      178055    1.30   -0.04  1.0000
   0  -3  17   69299   64017                                                       58517    1.30   -0.04  1.0000
   0   3 -16   85666   54029                                                      105744   -1.98   -0.02  1.0000
   0  -3  16  217685  102166                                                      248921   -1.98    0.02  1.0000
   0  -3  16  128945  106627                                                      153207   -1.98    0.02  1.0000
   0   3 -16  101098   85604                                                      122826   -1.98   -0.02  1.0000
   0  -3  15 6280114  469740                                                     6368229    1.04   -0.03  1.0000
   0  -3  15 6344314  401101                                                     6432877    1.04   -0.03  1.0000
   0   3 -15 6117276  408175                                                     6204789    1.04    0.03  1.0000
   0   3 -15 6173336  436172                                                     6261248    1.04    0.03  1.0000
   0   3 -14  558380  138086                                                      542092    0.66   -0.02  1.0000
   0  -3  14  546913  114112                                                      530628    0.66    0.02  1.0000
   0   3 -14  724574  133556                                                      706003    0.66   -0.02  1.0000
   0  -3  14  646140  150826                                                      628429    0.66    0.02  1.0000
   0  -3  13     785   46269                                                       -7577   -1.65    0.02  1.0000
   0  -3  13   13273   44487                                                       12457   -1.65    0.02  1.0000
   0  -3  13     785   70021                                                      -24743   -1.65    0.02  1.0000
   0   3 -13   47229   62901                                                       46620   -1.65   -0.02  1.0000
   0   3 -13   45644   52573                                                       45033   -1.65   -0.02  1.0000
   0   3 -12 2404639  110102                                                     2517243    2.11    0.03  1.0000
   0   3 -12 2891738  265028                                                     3015098    2.11    0.03  1.0000
   0  -3  12 2447677  229728                                                     2561121    2.11   -0.03  1.0000
   0   3 -12 2236741  223213                                                     2345389    2.11    0.03  1.0000
   0  -3  12 2667789  271985                                                     2786168    2.11   -0.03  1.0000
   0  -3  12 2581224  240618                                                     2697687    2.11   -0.03  1.0000
   0   3 -11 2114528  111649                                                     2247301   -2.64   -0.01  1.0000
   0  -3  11 2286095  211185                                                     2424027   -2.64    0.01  1.0000
   0  -3  11 2001047  202441                                                     2130224   -2.64    0.01  1.0000
   0   3 -11 2307984  236193                                                     2446607   -2.64   -0.01  1.0000
   0  -3  11 1908422  230541                                                     2034621   -2.64    0.01  1.0000
   0   3 -11 1942026  221822                                                     2069352   -2.64   -0.01  1.0000
   0   3 -11 2019690  202554                                                     2149497   -2.64   -0.01  1.0000
   0   3 -10 4248384  164092                                                     4461349    3.02    0.03  1.0000
   0   3 -10 4504065  306532                                                     4723269    3.02    0.03  1.0000
   0  -3  10 5190890  335897                                                     5425380    3.02   -0.03  1.0000
   0   3 -10 4478672  296703                                                     4697264    3.02    0.03  1.0000
   0  -3  10 4146248  272437                                                     4356090    3.02   -0.03  1.0000
   0  -3  10 4508092  339282                                                     4726791    3.02   -0.03  1.0000
   0   3 -10 4822537  325419                                                     5049269    3.02    0.03  1.0000
   0   3 -10 3870128  316513                                                     4073508    3.02    0.03  1.0000
   0  -3  10 4833959  297477                                                     5060334    3.02   -0.03  1.0000
   0   3 -10 4262170  284640                                                     4475476    3.02    0.03  1.0000
   0   3  -9  231074   82245                                                      273140   -2.54   -0.08  1.0000
   0  -3   9  156941   71417                                                      191284   -2.54    0.08  1.0000
   0   3  -9  126238   59511                                                      157760   -2.54   -0.08  1.0000
   0  -3   9  200181   66769                                                      238769   -2.54    0.08  1.0000
   0   3  -9  194250   76612                                                      232956   -2.54   -0.08  1.0000
   0  -3   9  277162   82004                                                      322296   -2.54    0.08  1.0000
   0   3  -9  189657   84908                                                      227922   -2.54   -0.08  1.0000
   0  -3   9  194651   60956                                                      232724   -2.54    0.08  1.0000
   0  -3   9  187365   69161                                                      224748   -2.54    0.08  1.0000
   0   3  -9  192330   69512                                                      230853   -2.54   -0.08  1.0000
   0   3  -9  218212   43383                                                      259137   -2.54   -0.08  1.0000
   0  -3   9  310015   88474                                                      357661   -2.54    0.08  1.0000
   0   3  -9  212133   84758                                                      252508   -2.54   -0.08  1.0000
   0   3  -8 5668996  338505                                                     5690655   -0.28    0.09  1.0000
   0  -3   8 5370010  284980                                                     5393095   -0.28   -0.09  1.0000
   0   3  -8 4836775  280084                                                     4856782   -0.28    0.09  1.0000
   0   3  -8 5322907  285109                                                     5343894   -0.28    0.09  1.0000
   0   3  -8 4905157  303872                                                     4925304   -0.28    0.09  1.0000
   0   3  -8 5171537  187909                                                     5192223   -0.28    0.09  1.0000
   0  -3   8 4998741  300980                                                     5021015   -0.28   -0.09  1.0000
   0  -3   8 5044581  262569                                                     5066957   -0.28   -0.09  1.0000
   0  -3   8 5188238  275862                                                     5210929   -0.28   -0.09  1.0000
   0  -3   8 5785483  313896                                                     5809444   -0.28   -0.09  1.0000
   0   3  -8 5444890  301622                                                     5466117   -0.28    0.09  1.0000
   0  -3   8 5721634  298435                                                     5745461   -0.28   -0.09  1.0000
   0   3  -8 4674446  266396                                                     4694114   -0.28    0.09  1.0000
   0   3  -7 9897175  372250                                                    10459366    5.21   -0.05  1.0000
   0  -3   7 9180915  364042                                                     9723650    5.21    0.05  1.0000
   0   3  -7 8610892  346691                                                     9135798    5.21   -0.05  1.0000
   0   3  -7 9584141  377728                                                    10137495    5.21   -0.05  1.0000
   0   3  -7 9385834  419588                                                     9933512    5.21   -0.05  1.0000
   0  -3   7 8956013  340581                                                     9492156    5.21    0.05  1.0000
   0   3  -7 8672063  396852                                                     9198803    5.21   -0.05  1.0000
   0  -3   7 8484782  380480                                                     9006834    5.21    0.05  1.0000
   0  -3   710214283  384678                                                    10786325    5.21    0.05  1.0000
   0   3  -7 8822204  371916                                                     9353419    5.21   -0.05  1.0000
   0  -3   7 9316878  368180                                                     9863561    5.21    0.05  1.0000
   0   3  -6 2856861  225774                                                     3281958   -7.14    0.02  1.0000
   0  -3   6 2837035  207565                                                     3260610   -7.14   -0.02  1.0000
   0  -3   6 2940848  203562                                                     3371837   -7.14   -0.02  1.0000
   0  -3   6 3054543  204069                                                     3493503   -7.14   -0.02  1.0000
   0   3  -6 2703329  196473                                                     3117245   -7.14    0.02  1.0000
   0   3  -6 2874945  201319                                                     3301339   -7.14    0.02  1.0000
   0   3  -6 2516581  188379                                                     2916462   -7.14    0.02  1.0000
   0   3  -6 2851878  202418                                                     3276616   -7.14    0.02  1.0000
   0  -3   6 2758755  188900                                                     3176650   -7.14   -0.02  1.0000
   0  -3   6 2844820  188398                                                     3268956   -7.14   -0.02  1.0000
   0   3  -6 3052878  227853                                                     3491820   -7.14    0.02  1.0000
   0  -3   5    2122   29702                                                       -7217    2.71   -0.01  1.0000
   0   3  -5   46224   26781                                                       31146    2.71    0.01  1.0000
   0   3  -5   26612   33180                                                       15385    2.71    0.01  1.0000
   0  -3   5   37537   31470                                                       23917    2.71   -0.01  1.0000
   0   3  -5   36397   26578                                                       23114    2.71    0.01  1.0000
   0  -3   5    2122   20613                                                       -3455    2.71   -0.01  1.0000
   0  -3   5   96839   42462                                                       74433    2.71   -0.01  1.0000
   0   3  -5   91995   40326                                                       70395    2.71    0.01  1.0000
   0   3  -5   48186   34045                                                       32774    2.71    0.01  1.0000
   0  -3   5    9394   23178                                                        3120    2.71   -0.01  1.0000
   0   3  -4 3189481  169896                                                     3021750    2.80   -0.06  1.0000
   0  -3   4 3165864  159048                                                     2998593    2.80    0.06  1.0000
   0   3  -4 2922885  155888                                                     2762414    2.80   -0.06  1.0000
   0  -3   4 3009040  165881                                                     2846022    2.80    0.06  1.0000
   0  -3   4 3217538  169695                                                     3048889    2.80    0.06  1.0000
   0  -3   4 2973637  145250                                                     2811594    2.80    0.06  1.0000
   0  -3   4 3205126  166567                                                     3036807    2.80    0.06  1.0000
   0   3  -4 2983689  165817                                                     2821534    2.80   -0.06  1.0000
   0   3  -363881072  736038                                                    65301236   -5.21    0.07  1.0000
   0   3  -369405112  762872                                                    70885072   -5.21    0.07  1.0000
   0  -3   367997840  761306                                                    69465128   -5.21   -0.07  1.0000
   0  -3   367033404  709221                                                    68490312   -5.21   -0.07  1.0000
   0   3  -365275900  716507                                                    66711404   -5.21    0.07  1.0000
   0  -3   365648268  627957                                                    67090116   -5.21   -0.07  1.0000
   0  -3   366812652  748111                                                    68267152   -5.21   -0.07  1.0000
   0   3  -367571328  643918                                                    69031720   -5.21    0.07  1.0000
   0   3  -223745530  421480                                                    25471018   10.25   -0.03  1.0000
   0   3  -224029420  413822                                                    25765006   10.25   -0.03  1.0000
   0  -3   223770780  342436                                                    25497824   10.25    0.03  1.0000
   0   3  -224426294  348895                                                    26175908   10.25   -0.03  1.0000
   0  -3   223951778  424231                                                    25685272   10.25    0.03  1.0000
   0  -3   224586596  435012                                                    26342518   10.25    0.03  1.0000
   0   3  -224518628  432877                                                    26271490   10.25   -0.03  1.0000
   0  -3   224752862  417408                                                    26514606   10.25    0.03  1.0000
   0   3  -120282270  260749                                                    17410722  -19.50   -0.04  1.0000
   0   3  -120648652  355573                                                    17750300  -19.50   -0.04  1.0000
   0   3  -120062912  309479                                                    17207522  -19.50   -0.04  1.0000
   0  -3   121107118  332084                                                    18176268  -19.50    0.04  1.0000
   0  -3   120963508  307114                                                    18043018  -19.50    0.04  1.0000
   0   3  -121934336  340110                                                    18943770  -19.50   -0.04  1.0000
   0  -3   120598942  353466                                                    17704906  -19.50    0.04  1.0000
   0   3   027502058  351227                                                    23899128   20.95    0.06  1.0000
   0   3   026998140  423301                                                    23429528   20.95    0.06  1.0000
   0   3   026862762  317067                                                    23303422   20.95    0.06  1.0000
   0  -3   027333172  316784                                                    23742986   20.95   -0.06  1.0000
   0  -3   027343036  347038                                                    23752182   20.95   -0.06  1.0000
   0  -3   028103460  426950                                                    24461280   20.95   -0.06  1.0000
   0  -3  -1  361034   42427                                                      204920   -8.71    0.04  1.0000
   0   3   1  269895   39960                                                      137899   -8.71   -0.04  1.0000
   0  -3  -1  276510   24537                                                      142628   -8.71    0.04  1.0000
   0  -3  -1  301280   29150                                                      160568   -8.71    0.04  1.0000
   0   3   1  282197   26068                                                      146731   -8.71   -0.04  1.0000
   0   3   1  267653   24984                                                      136298   -8.71   -0.04  1.0000
   0  -3  -2 5774593  234238                                                     5410235   -4.54   -0.05  1.0000
   0   3   2 5806918  222591                                                     5441248   -4.54    0.05  1.0000
   0   3   2 5436103  193810                                                     5082493   -4.54    0.05  1.0000
   0  -3  -2 5940436  193049                                                     5570799   -4.54   -0.05  1.0000
   0  -3  -2 5839486  153406                                                     5473054   -4.54   -0.05  1.0000
   0   3   2 5771957  150653                                                     5407408   -4.54    0.05  1.0000
   0   3   2 5886086  229790                                                     5517891   -4.54    0.05  1.0000
   0  -3  -3 4105198  194869                                                     4690396    8.23    0.08  1.0000
   0   3   3 4329331  192860                                                     4928895    8.23   -0.08  1.0000
   0   3   3 4434410  228654                                                     5040973    8.23   -0.08  1.0000
   0  -3  -3 4027096  179911                                                     4606886    8.23    0.08  1.0000
   0   3   3 4068639  135866                                                     4650461    8.23   -0.08  1.0000
   0  -3  -3 3932169  220034                                                     4505315    8.23    0.08  1.0000
   0   3   3 3975456  220040                                                     4550798    8.23   -0.08  1.0000
   0  -3  -3 3862033  213467                                                     4430218    8.23    0.08  1.0000
   0   3   4  308143   42284                                                      213060   -8.50    0.11  1.0000
   0  -3  -4  320182   54400                                                      220375   -8.50   -0.11  1.0000
   0  -3  -4  353517   50760                                                      248780   -8.50   -0.11  1.0000
   0  -3  -4  296453   55837                                                      200322   -8.50   -0.11  1.0000
   0  -3  -4  394861   50790                                                      284333   -8.50   -0.11  1.0000
   0   3   4  349649   59919                                                      248615   -8.50    0.11  1.0000
   0   3   4  422144   64106                                                      311542   -8.50    0.11  1.0000
   0   3   4  297397   41970                                                      203922   -8.50    0.11  1.0000
   0  -3  -5 4192085  186761                                                     3392412   12.24    0.11  1.0000
   0  -3  -5 4161327  179499                                                     3364744   12.24    0.11  1.0000
   0   3   5 4152573  181040                                                     3359158   12.24   -0.11  1.0000
   0   3   5 4462624  204237                                                     3638629   12.24   -0.11  1.0000
   0  -3  -5 4115982  205013                                                     3323977   12.24    0.11  1.0000
   0   3   5 4212626  215387                                                     3413201   12.24   -0.11  1.0000
   0   3   5 4060137  227295                                                     3276058   12.24   -0.11  1.0000
   0   3   5 4387420  185206                                                     3570742   12.24   -0.11  1.0000
   0  -3  -5 4204545  219791                                                     3403623   12.24    0.11  1.0000
   0   3   6  133312   51777                                                      156770  -15.36    0.09  1.0000
   0   3   6   84645   36459                                                       83212  -15.36    0.09  1.0000
   0  -3  -6  101474   56162                                                      108187  -15.36   -0.09  1.0000
   0   3   6  100850   35927                                                      109111  -15.36    0.09  1.0000
   0  -3  -6  106012   41371                                                      115075  -15.36   -0.09  1.0000
   0  -3  -6  130232   55834                                                      150352  -15.36   -0.09  1.0000
   0  -3  -6   64667   22453                                                       44497  -15.36   -0.09  1.0000
   0   3   6  103589   62686                                                      113307  -15.36    0.09  1.0000
   0   3   6   89043   37476                                                       90458  -15.36    0.09  1.0000
   0   3   7 1310936  184289                                                     1906009   13.91   -0.07  1.0000
   0  -3  -7 1061777  160023                                                     1603284   13.91    0.07  1.0000
   0  -3  -7 1181219  172209                                                     1749349   13.91    0.07  1.0000
   0  -3  -7 1016415  141969                                                     1547421   13.91    0.07  1.0000
   0   3   7 1215742  159581                                                     1790840   13.91   -0.07  1.0000
   0   3   7 1213082  191448                                                     1787612   13.91   -0.07  1.0000
   0   3   7 1321347  155517                                                     1918562   13.91   -0.07  1.0000
   0   3   7 1035093  139723                                                     1570001   13.91   -0.07  1.0000
   0  -3  -8  353426   45928                                                      166717  -10.96   -0.05  1.0000
   0   3   8  317173   69151                                                      142202  -10.96    0.05  1.0000
   0   3   8  364431   63803                                                      174396  -10.96    0.05  1.0000
   0   3   8  360322   37874                                                      171557  -10.96    0.05  1.0000
   0   3   8  214932   28990                                                       77000  -10.96    0.05  1.0000
   0   3   8  321358   44673                                                      145010  -10.96    0.05  1.0000
   0  -3  -8  244783   44721                                                       95202  -10.96   -0.05  1.0000
   0   3   8  303827   51429                                                      133311  -10.96    0.05  1.0000
   0  -3  -8  420994   79421                                                      214057  -10.96   -0.05  1.0000
   0   3   9 7200701  380529                                                     8082661    9.45   -0.04  1.0000
   0   3   9 7823953  372636                                                     8742224    9.45   -0.04  1.0000
   0   3   9 6734474  433852                                                     7588231    9.45   -0.04  1.0000
   0   3   9 7525651  420439                                                     8426731    9.45   -0.04  1.0000
   0  -3  -9 7038182  392845                                                     7911198    9.45    0.04  1.0000
   0   3   9 6999888  333021                                                     7869815    9.45   -0.04  1.0000
   0   3   9 6675791  259211                                                     7525931    9.45   -0.04  1.0000
   0  -3  -9 7336990  406916                                                     8227817    9.45    0.04  1.0000
   0  -3  -9 7762881  367493                                                     8678476    9.45    0.04  1.0000
   0   3  10 4078057  287624                                                     4692891   -8.76    0.01  1.0000
   0   3  10 3742315  207326                                                     4332180   -8.76    0.01  1.0000
   0   3  10 3562999  254082                                                     4139066   -8.76    0.01  1.0000
   0   3  10 3692429  340719                                                     4278489   -8.76    0.01  1.0000
   0   3  10 3563117  281858                                                     4139193   -8.76    0.01  1.0000
   0   3  10 4022825  324170                                                     4633624   -8.76    0.01  1.0000
   0  -3 -10 3919497  318504                                                     4522818   -8.76   -0.01  1.0000
   0  -3 -10 3699859  277752                                                     4286628   -8.76   -0.01  1.0000
   0   3  11 5870511  404678                                                     5241521    7.89    0.04  1.0000
   0   3  11 6272120  348755                                                     5621379    7.89    0.04  1.0000
   0  -3 -11 6174714  374175                                                     5529836    7.89   -0.04  1.0000
   0   3  11 6388987  307173                                                     5732048    7.89    0.04  1.0000
   0   3  11 6069946  250039                                                     5430066    7.89    0.04  1.0000
   0  -3 -11 6196660  334755                                                     5550606    7.89   -0.04  1.0000
   0  -3 -1217332394  649070                                                    16465064   -6.24    0.04  1.0000
   0   3  1217809802  730571                                                    16929478   -6.24   -0.04  1.0000
   0   3  1217826658  547591                                                    16945914   -6.24   -0.04  1.0000
   0  -3 -1217232716  594698                                                    16367915   -6.24    0.04  1.0000
   0   3  1216850470  450145                                                    15994485   -6.24   -0.04  1.0000
   0   3  13  113028   72437                                                       74591    3.74   -0.03  1.0000
   0   3  13   10160   58684                                                        1403    3.74   -0.03  1.0000
   0  -3 -13   43018   59039                                                       20848    3.74    0.03  1.0000
   0   3  13  102534   57069                                                       66112    3.74   -0.03  1.0000
   0   3  13  168051   58003                                                      120324    3.74   -0.03  1.0000
   0  -3 -13  389838  125856                                                      315289    3.74    0.03  1.0000
   0   3  14 2350342  302584                                                     2439456   -1.70    0.07  1.0000
   0   3  14 2150289  288664                                                     2235561   -1.70    0.07  1.0000
   0   3  14 2150317  218913                                                     2235591   -1.70    0.07  1.0000
   0   3  14 2343342  156981                                                     2432324   -1.70    0.07  1.0000
   0  -3 -14 2135841  234196                                                     2221238   -1.70   -0.07  1.0000
   0  -3 -14 2386940  271566                                                     2477171   -1.70   -0.07  1.0000
   0   3  14 2251451  189159                                                     2338687   -1.70    0.07  1.0000
   0   3  15 1245974  229979                                                     1216578    0.79   -0.05  1.0000
   0  -3 -15 1183192  194249                                                     1154160    0.79    0.05  1.0000
   0   3  15 1357834  152029                                                     1327139    0.79   -0.05  1.0000
   0   3  15 1426234  175330                                                     1394771    0.79   -0.05  1.0000
   0  -3 -15 1361960  196553                                                     1330798    0.79    0.05  1.0000
   0   3  15 1310587  112905                                                     1280434    0.79   -0.05  1.0000
   0   3  15 1281941  226331                                                     1252121    0.79   -0.05  1.0000
   0   3  16  672785  185700                                                      671243    0.05    0.02  1.0000
   0   3  16  624652  173442                                                      623166    0.05    0.02  1.0000
   0   3  16  731216  140579                                                      729608    0.05    0.02  1.0000
   0   3  16  595644   77871                                                      594193    0.05    0.02  1.0000
   0  -3 -16  561389  150501                                                      560144    0.05   -0.02  1.0000
   0   3  16  646676  115555                                                      645164    0.05    0.02  1.0000
   0  -3 -16  412591  127347                                                      411524    0.05   -0.02  1.0000
   0   3  17 6236192  398198                                                     6160138   -0.90   -0.01  1.0000
   0  -3 -17 6222824  473601                                                     6147067   -0.90    0.01  1.0000
   0   3  17 5822295  509726                                                     5748817   -0.90   -0.01  1.0000
   0   3  17 6808930  360531                                                     6729450   -0.90   -0.01  1.0000
   0  -3 -17 6210007  447288                                                     6134329   -0.90    0.01  1.0000
   0   3  17 6453378  540688                                                     6376007   -0.90   -0.01  1.0000
   0   3  17 6385158  237368                                                     6308199   -0.90   -0.01  1.0000
   0   3  18  263208   52631                                                      272592    0.53   -0.01  1.0000
   0   3  18  511975  183851                                                      525031    0.53   -0.01  1.0000
   0  -3 -18  344082  127782                                                      354796    0.53    0.01  1.0000
   0   3  18  258421  109687                                                      267720    0.53   -0.01  1.0000
   0   3  18  342189  150272                                                      352877    0.53   -0.01  1.0000
   0   3  18  319683   91323                                                      330017    0.53   -0.01  1.0000
   0  -3 -18  367257  156673                                                      378323    0.53    0.01  1.0000
   0   3  19 1264608  249735                                                     1236252    0.75    0.03  1.0000
   0  -3 -19 1074672  198357                                                     1048842    0.75   -0.03  1.0000
   0  -3 -19 1203674  213963                                                     1176329    0.75   -0.03  1.0000
   0   3  19 1223857  248484                                                     1195964    0.75    0.03  1.0000
   0   3  19 1280063  168727                                                     1251534    0.75    0.03  1.0000
   0   3  19 1183930  180600                                                     1156498    0.75    0.03  1.0000
   0  -3 -20     547   90955                                                      -71556   -1.38    0.02  1.0000
   0  -3 -20     547   65321                                                      -89641   -1.38    0.02  1.0000
   0   3  20     547  112514                                                     -140559   -1.38   -0.02  1.0000
   0   3  20  131536   97839                                                      115908   -1.38   -0.02  1.0000
   0   3  20     547   52608                                                       -8913   -1.38   -0.02  1.0000
   0   3  20   83801   56410                                                       71416   -1.38   -0.02  1.0000
   0  -3 -21     285   87291                                                      -27582    0.99    0.02  1.0000
   0   3  21     285  102433                                                      -47509    0.99   -0.02  1.0000
   0  -3 -21  111015   68453                                                      100408    0.99    0.02  1.0000
   0   3  21     285  101250                                                      -12090    0.99   -0.02  1.0000
   0   3  21   47959   60720                                                       41141    0.99   -0.02  1.0000
   0   3  21   34099   41904                                                       28388    0.99   -0.02  1.0000
   0   3  22 2577758  255712                                                     2556895   -0.39    0.04  1.0000
   0   3  22 2621746  397482                                                     2600705   -0.39    0.04  1.0000
   0  -3 -22 2404031  341279                                                     2383495   -0.39   -0.04  1.0000
   0  -3 -22 2545410  331524                                                     2524277   -0.39   -0.04  1.0000
   0   3  22 2753758  405715                                                     2732193   -0.39    0.04  1.0000
   0   3  22 2638238  300155                                                     2617131   -0.39    0.04  1.0000
   0   3  23  244780  140719                                                      247375    0.17   -0.04  1.0000
   0   3  23  198601   99676                                                      200939    0.17   -0.04  1.0000
   0   3  23  148686  121512                                                      150709    0.17   -0.04  1.0000
   0   3  23  223807  108417                                                      226289    0.17   -0.04  1.0000
   0  -3 -23   23187   81162                                                       24109    0.17    0.04  1.0000
   0  -3 -23  203243  129144                                                      205956    0.17    0.04  1.0000
   0  -3 -24 2679588  378206                                                     2702608   -0.41   -0.04  1.0000
   0  -3 -24 2272646  353414                                                     2293850   -0.41   -0.04  1.0000
   0   3  24 2497702  413850                                                     2519337   -0.41    0.04  1.0000
   0   3  24 2759731  310165                                                     2782469   -0.41    0.04  1.0000
   0   3  24 2873167  452992                                                     2896367   -0.41    0.04  1.0000
   0   3  25     101  162903                                                      -74040    0.59   -0.05  1.0000
   0   3  25   45087  100563                                                       49257    0.59   -0.05  1.0000
   0  -3 -25   86556   74892                                                       92497    0.59    0.05  1.0000
   0   3  25   98227   89222                                                      104342    0.59   -0.05  1.0000
   0  -3 -25   43856   86481                                                       48113    0.59    0.05  1.0000
   0   3  26   56065   99758                                                       53256   -0.40    0.05  1.0000
   0   3  26      48   89303                                                      -14224   -0.40    0.05  1.0000
   0  -3 -26      48  137218                                                     -226407   -0.40   -0.05  1.0000
   0   3  26      48   87621                                                      -92537   -0.40    0.05  1.0000
   0  -3 -26   51953   91134                                                       48959   -0.40   -0.05  1.0000
   0   3  27  231147  174440                                                      240746    0.58   -0.05  1.0000
   0  -3 -27   78252   98751                                                       83906    0.58    0.05  1.0000
   0  -3 -27   66857  105096                                                       72091    0.58    0.05  1.0000
   0   3  27      99  115835                                                     -145803    0.58   -0.05  1.0000
   0   3  28  401673  184223                                                      372606   -1.39    0.05  1.0000
   0  -3 -28  476315  193680                                                      444347   -1.39   -0.05  1.0000
   0  -3 -28  288496  145081                                                      263739   -1.39   -0.05  1.0000
   0   3  28   74891   97227                                                       62643   -1.39    0.05  1.0000
   0   3  29  500146  205608                                                      466921    1.44   -0.03  1.0000
   0   3  29  763993  251210                                                      722802    1.44   -0.03  1.0000
   0  -3 -29  258753  112523                                                      234793    1.44    0.03  1.0000
   0  -3 -29  569395  209459                                                      533582    1.44    0.03  1.0000
   0  -3 -30       0  131026                                                      -46819    0.02   -0.01  1.0000
   0  -3 -31     678  129073                                                      -17688   -1.53    0.01  1.0000
   0  -3 -32     826  184776                                                     -385657    1.69   -0.02  1.0000
   0  -4  30  318479  130215                                                      284421   -1.84    0.01  1.0000
   0  -4  29     182   95745                                                      -75139    0.79    0.00  1.0000
   0   4 -29  163763  128232                                                      174704    0.79    0.00  1.0000
   0   4 -29     182  141051                                                     -187455    0.79    0.00  1.0000
   0  -4  29   51107  123388                                                       57282    0.79    0.00  1.0000
   0  -4  29    1146  107020                                                        2214    0.79    0.00  1.0000
   0   4 -28  245782  123423                                                      238541   -0.43    0.00  1.0000
   0  -4  28  109059  145375                                                      104259   -0.43    0.00  1.0000
   0   4 -28   64869  123357                                                       61175   -0.43    0.00  1.0000
   0  -4  28  174964  120008                                                      168870   -0.43    0.00  1.0000
   0  -4  28  173637  104257                                                      167567   -0.43    0.00  1.0000
   0  -4  27 1309541  245446                                                     1268674    1.07   -0.01  1.0000
   0  -4  27 1282394  285882                                                     1241956    1.07   -0.01  1.0000
   0   4 -27 1311289  264362                                                     1270278    1.07    0.01  1.0000
   0   4 -27 1535949  327082                                                     1491538    1.07    0.01  1.0000
   0  -4  27 1807702  366003                                                     1759631    1.07   -0.01  1.0000
   0  -4  26   70369   81163                                                       63763   -0.77   -0.01  1.0000
   0  -4  26    3788   93199                                                        2375   -0.77   -0.01  1.0000
   0   4 -26  194237  142625                                                      183216   -0.77    0.01  1.0000
   0  -4  26   97445  111268                                                       89643   -0.77   -0.01  1.0000
   0   4 -26     171  116238                                                      -97814   -0.77    0.01  1.0000
   0  -4  25  519306  205197                                                      503336   -0.68    0.05  1.0000
   0   4 -25  529166  168689                                                      512515   -0.68   -0.05  1.0000
   0  -4  25  407867  149245                                                      393728   -0.68    0.05  1.0000
   0  -4  25  480642  164534                                                      465283   -0.68    0.05  1.0000
   0   4 -25  441886  178458                                                      426682   -0.68   -0.05  1.0000
   0  -4  24  216813  122652                                                      195971    1.38   -0.06  1.0000
   0   4 -24  230806  110006                                                      209008    1.38    0.06  1.0000
   0  -4  24  225515   71571                                                      204249    1.38   -0.06  1.0000
   0  -4  24  240291  102674                                                      218323    1.38   -0.06  1.0000
   0   4 -24  593391  177468                                                      558118    1.38    0.06  1.0000
   0  -4  23 1530448  297335                                                     1487654   -1.03    0.03  1.0000
   0   4 -23 1257768  239017                                                     1218867   -1.03   -0.03  1.0000
   0   4 -23 1043062  223614                                                     1007664   -1.03   -0.03  1.0000
   0  -4  23 1176419  210378                                                     1138937   -1.03    0.03  1.0000
   0   4 -22 1329957  247065                                                     1284777    1.16    0.03  1.0000
   0  -4  22 1192187  216270                                                     1149630    1.16   -0.03  1.0000
   0   4 -22 1239219  237389                                                     1195622    1.16    0.03  1.0000
   0  -4  22 1011341  243594                                                      972175    1.16   -0.03  1.0000
   0  -4  21 2629672  384134                                                     2745303   -2.08    0.05  1.0000
   0   4 -21 2263115  335523                                                     2370855   -2.08   -0.05  1.0000
   0   4 -21 2890074  349964                                                     3011664   -2.08   -0.05  1.0000
   0  -4  21 2410571  308759                                                     2521333   -2.08    0.05  1.0000
   0   4 -20 5749730  523181                                                     5957241    2.53    0.05  1.0000
   0  -4  20 6358586  562721                                                     6575655    2.53   -0.05  1.0000
   0  -4  20 5868174  466537                                                     6076774    2.53   -0.05  1.0000
   0   4 -20 5679706  468667                                                     5885960    2.53    0.05  1.0000
   0  -4  19   90603   98405                                                      107173   -1.60    0.04  1.0000
   0  -4  19  130568  141668                                                      150329   -1.60    0.04  1.0000
   0   4 -19   76885  117547                                                       92350   -1.60   -0.04  1.0000
   0   4 -19   19310   64578                                                       27397   -1.60   -0.04  1.0000
   0   4 -18 3166101  332195                                                     3177540   -0.19    0.03  1.0000
   0   4 -18 3282588  361240                                                     3294236   -0.19    0.03  1.0000
   0  -4  18 3178784  375086                                                     3190601   -0.19   -0.03  1.0000
   0  -4  18 3245969  323162                                                     3257910   -0.19   -0.03  1.0000
   0   4 -17     443   57539                                                       -5241    1.24    0.00  1.0000
   0   4 -17   90264   71198                                                       78100    1.24    0.00  1.0000
   0  -4  17  168417   86852                                                      151633    1.24    0.00  1.0000
   0  -4  17     443   57901                                                      -40359    1.24    0.00  1.0000
   0  -4  16  404666  126123                                                      385865   -0.88    0.03  1.0000
   0   4 -16  273000  102123                                                      257603   -0.88   -0.03  1.0000
   0  -4  16  430923  141823                                                      411514   -0.88    0.03  1.0000
   0   4 -16  435043  133036                                                      415547   -0.88   -0.03  1.0000
   0   4 -1515343805  695826                                                    15390658    0.35    0.02  1.0000
   0   4 -1515692640  650001                                                    15740021    0.35    0.02  1.0000
   0   4 -1513787170  269628                                                    13831585    0.35    0.02  1.0000
   0  -4  1514827173  628017                                                    14872826    0.35   -0.02  1.0000
   0  -4  1515224941  728503                                                    15271203    0.35   -0.02  1.0000
   0  -4  14  290967  104587                                                      294637   -0.20    0.01  1.0000
   0   4 -14  323809  131064                                                      327724   -0.20   -0.01  1.0000
   0  -4  14  287277   94512                                                      290924   -0.20    0.01  1.0000
   0  -4  14  385444  144529                                                      389666   -0.20    0.01  1.0000
   0   4 -14  210537   59428                                                      213696   -0.20   -0.01  1.0000
   0   4 -14  244918   43606                                                      248325   -0.20   -0.01  1.0000
   0   4 -13 4764103  341836                                                     4836990   -0.99    0.03  1.0000
   0  -4  13 4744305  337490                                                     4817639   -0.99   -0.03  1.0000
   0  -4  13 5380079  349039                                                     5458154   -0.99   -0.03  1.0000
   0   4 -13 4480729  377040                                                     4551424   -0.99    0.03  1.0000
   0   4 -13 5014366  195526                                                     5089136   -0.99    0.03  1.0000
   0   4 -13 4784434  357811                                                     4857476   -0.99    0.03  1.0000
   0  -4  13 5333874  400075                                                     5411614   -0.99   -0.03  1.0000
   0   4 -12 2162770  249178                                                     2340400    3.52   -0.04  1.0000
   0   4 -12 2269675  142319                                                     2451558    3.52   -0.04  1.0000
   0  -4  12 2346105  229087                                                     2531556    3.52    0.04  1.0000
   0   4 -12 1798399  239650                                                     1960679    3.52   -0.04  1.0000
   0  -4  12 2397378  268729                                                     2584807    3.52    0.04  1.0000
   0   4 -12 2270729  232230                                                     2452654    3.52   -0.04  1.0000
   0  -4  12 2125295  229274                                                     2301971    3.52    0.04  1.0000
   0   4 -11   65352   45768                                                       42514   -5.07    0.02  1.0000
   0  -4  11  102882   61675                                                       74624   -5.07   -0.02  1.0000
   0   4 -11   18735   62409                                                        5678   -5.07    0.02  1.0000
   0   4 -11   60659   30628                                                       38556   -5.07    0.02  1.0000
   0   4 -11   23531   34134                                                        9011   -5.07    0.02  1.0000
   0  -4  11    7422   27054                                                       -1285   -5.07   -0.02  1.0000
   0  -4  11    7422   44213                                                       -1338   -5.07   -0.02  1.0000
   0   4 -11   46378   67694                                                       26732   -5.07    0.02  1.0000
   0  -4  10  182436   76320                                                      238494    3.64   -0.01  1.0000
   0   4 -10  286317  118593                                                      355668    3.64    0.01  1.0000
   0  -4  10  304495   84089                                                      375845    3.64   -0.01  1.0000
   0   4 -10  261465   93183                                                      327902    3.64    0.01  1.0000
   0   4 -10  300148   65381                                                      371067    3.64    0.01  1.0000
   0   4 -10   63459   42665                                                       98056    3.64    0.01  1.0000
   0   4 -10  102681   58322                                                      145691    3.64    0.01  1.0000
   0  -4  10  245274   81960                                                      309688    3.64   -0.01  1.0000
   0  -4  10  263537   98379                                                      330171    3.64   -0.01  1.0000
   0  -4   9  301342   74146                                                      307188    0.31    0.00  1.0000
   0   4  -9  414016   88488                                                      420854    0.31    0.00  1.0000
   0  -4   9  436671   89999                                                      443702    0.31    0.00  1.0000
   0  -4   9  501512  104018                                                      509045    0.31    0.00  1.0000
   0  -4   9  438039  103874                                                      445081    0.31    0.00  1.0000
   0   4  -9  316224   82064                                                      322203    0.31    0.00  1.0000
   0   4  -9  438712  102117                                                      445749    0.31    0.00  1.0000
   0   4  -9  325680   96226                                                      331747    0.31    0.00  1.0000
   0   4  -9  482090   69119                                                      489466    0.31    0.00  1.0000
   0   4  -9  382910   95314                                                      389486    0.31    0.00  1.0000
   0  -4   9  339242   81202                                                      345443    0.31    0.00  1.0000
   0   4  -9  373274   89217                                                      379768    0.31    0.00  1.0000
   0  -4   822934274  583068                                                    23549080   -3.76   -0.01  1.0000
   0   4  -820886124  670570                                                    21472764   -3.76    0.01  1.0000
   0  -4   821467258  568174                                                    22062210   -3.76   -0.01  1.0000
   0   4  -822429336  610501                                                    23037118   -3.76    0.01  1.0000
   0   4  -821720856  675633                                                    22319022   -3.76    0.01  1.0000
   0   4  -821405176  609868                                                    21999008   -3.76    0.01  1.0000
   0  -4   821291240  595554                                                    21883762   -3.76   -0.01  1.0000
   0  -4   822392400  627794                                                    22999942   -3.76   -0.01  1.0000
   0  -4   822361310  607022                                                    22968440   -3.76   -0.01  1.0000
   0   4  -822933092  629527                                                    23547614   -3.76    0.01  1.0000
   0   4  -820849558  585168                                                    21435684   -3.76    0.01  1.0000
   0   4  -7  187971   73601                                                      232591    3.27   -0.03  1.0000
   0  -4   7  251686   73544                                                      303512    3.27    0.03  1.0000
   0  -4   7  303003   81725                                                      359697    3.27    0.03  1.0000
   0   4  -7  188724   60918                                                      233429    3.27   -0.03  1.0000
   0   4  -7  216061   72428                                                      263779    3.27   -0.03  1.0000
   0  -4   7  200675   56775                                                      247140    3.27    0.03  1.0000
   0   4  -7  175295   74522                                                      218440    3.27   -0.03  1.0000
   0   4  -7  195801   59250                                                      241306    3.27   -0.03  1.0000
   0  -4   7  173102   53913                                                      216380    3.27    0.03  1.0000
   0  -4   7  206477   73245                                                      253583    3.27    0.03  1.0000
   0   4  -6 7400022  322747                                                     7402837    0.03    0.00  1.0000
   0   4  -6 6495270  341658                                                     6497907    0.03    0.00  1.0000
   0  -4   6 7153795  294354                                                     7156639    0.03    0.00  1.0000
   0  -4   6 7335503  282650                                                     7338384    0.03    0.00  1.0000
   0  -4   6 7341823  315249                                                     7344704    0.03    0.00  1.0000
   0  -4   6 6944836  307908                                                     6947638    0.03    0.00  1.0000
   0  -4   6 7444821  313154                                                     7447723    0.03    0.00  1.0000
   0   4  -6 7074112  344797                                                     7076866    0.03    0.00  1.0000
   0   4  -6 6764337  309433                                                     6767027    0.03    0.00  1.0000
   0   4  -6 6756648  289924                                                     6759338    0.03    0.00  1.0000
   0  -4   5 9814177  327529                                                     9940849   -1.18   -0.08  1.0000
   0  -4   5 9725232  353766                                                     9851332   -1.18   -0.08  1.0000
   0   4  -510225452  355891                                                    10353511   -1.18    0.08  1.0000
   0   4  -5 9861165  337428                                                     9986929   -1.18    0.08  1.0000
   0  -4   510102022  349316                                                    10230534   -1.18   -0.08  1.0000
   0  -4   5 9877947  306764                                                    10005028   -1.18   -0.08  1.0000
   0  -4   510834635  360121                                                    10967709   -1.18   -0.08  1.0000
   0   4  -5 9987548  354978                                                    10114112   -1.18    0.08  1.0000
   0   4  -4  957826  103386                                                      927187    0.93   -0.11  1.0000
   0   4  -4  975781   88431                                                      944854    0.93   -0.11  1.0000
   0  -4   4  768808   92452                                                      741459    0.93    0.11  1.0000
   0   4  -4  944342  104857                                                      913921    0.93   -0.11  1.0000
   0  -4   4  891158   84441                                                      861694    0.93    0.11  1.0000
   0  -4   4  865020   91449                                                      835995    0.93    0.11  1.0000
   0  -4   4  870098   95900                                                      840987    0.93    0.11  1.0000
   0   4  -4  897286   94693                                                      867639    0.93   -0.11  1.0000
   0   4  -3 2020296  150929                                                     2292393   -5.52    0.06  1.0000
   0   4  -3 2240628  131014                                                     2526733   -5.52    0.06  1.0000
   0  -4   3 2075304  124894                                                     2351826   -5.52   -0.06  1.0000
   0   4  -3 2270159  160039                                                     2558089   -5.52    0.06  1.0000
   0  -4   3 2128451  159022                                                     2408384   -5.52   -0.06  1.0000
   0   4  -3 2102717  153066                                                     2380139   -5.52    0.06  1.0000
   0  -4   3 2210387  155654                                                     2495495   -5.52   -0.06  1.0000
   0  -4   3 2092206  154463                                                     2369818   -5.52   -0.06  1.0000
   0  -4   2 1541342  139855                                                     2113025   12.53    0.00  1.0000
   0   4  -2 1669939  142067                                                     2263199   12.53    0.00  1.0000
   0  -4   2 1554071  143165                                                     2127925   12.53    0.00  1.0000
   0   4  -2 1575666  133275                                                     2153215   12.53    0.00  1.0000
   0   4  -2 1519522  108928                                                     2087490   12.53    0.00  1.0000
   0  -4   2 1651604  133757                                                     2241813   12.53    0.00  1.0000
   0   4  -2 1500227  140112                                                     2064862   12.53    0.00  1.0000
   0   4  -1  790070   65112                                                      523749  -11.03   -0.01  1.0000
   0  -4   1  862490   75028                                                      583727  -11.03    0.01  1.0000
   0   4  -1  856226   73814                                                      578188  -11.03   -0.01  1.0000
   0  -4   1  876167   79759                                                      595052  -11.03    0.01  1.0000
   0   4  -1  986777   82908                                                      686892  -11.03   -0.01  1.0000
   0  -4   1  780130   64738                                                      515946  -11.03    0.01  1.0000
   0   4   047781412  525526                                                    47659236    0.52    0.00  1.0000
   0  -4   048516764  577785                                                    48393572    0.52    0.00  1.0000
   0  -4   049492428  526123                                                    49367992    0.52    0.00  1.0000
   0  -4   049244496  698381                                                    49120376    0.52    0.00  1.0000
   0   4   048546164  700790                                                    48423020    0.52    0.00  1.0000
   0   4   050684552  585163                                                    50558724    0.52    0.00  1.0000
   0  -4  -115203728  392662                                                    14259410    7.24    0.01  1.0000
   0   4   114712177  385348                                                    13783549    7.24   -0.01  1.0000
   0  -4  -114480535  296101                                                    13559315    7.24    0.01  1.0000
   0  -4  -114279015  265861                                                    13364333    7.24    0.01  1.0000
   0   4   114741185  288642                                                    13811627    7.24   -0.01  1.0000
   0   4   114186020  263861                                                    13274424    7.24   -0.01  1.0000
   0   4   216211410  279745                                                    15137171   -7.98    0.04  1.0000
   0  -4  -216166948  368058                                                    15094027   -7.98   -0.04  1.0000
   0   4   216513377  430099                                                    15429008   -7.98    0.04  1.0000
   0   4   216884354  296294                                                    15787666   -7.98    0.04  1.0000
   0  -4  -216387749  303101                                                    15307402   -7.98   -0.04  1.0000
   0  -4  -213753569  416746                                                    12765397   -7.98   -0.04  1.0000
   0   4   315570551  462523                                                    16746824    8.61   -0.04  1.0000
   0   4   315173489  404180                                                    16334944    8.61   -0.04  1.0000
   0  -4  -314743731  373854                                                    15889021    8.61    0.04  1.0000
   0   4   314983422  296246                                                    16137713    8.61   -0.04  1.0000
   0  -4  -316143629  419119                                                    17341064    8.61    0.04  1.0000
   0  -4  -313838690  444850                                                    14948940    8.61    0.04  1.0000
   0  -4  -4 5789938  213957                                                     4904808  -11.38   -0.03  1.0000
   0   4   4 6020085  229338                                                     5117410  -11.38    0.03  1.0000
   0   4   4 5772687  160721                                                     4889497  -11.38    0.03  1.0000
   0   4   4 5928308  264424                                                     5032813  -11.38    0.03  1.0000
   0  -4  -4 5888164  262127                                                     4995255  -11.38   -0.03  1.0000
   0   4   4 5859692  265664                                                     4969603  -11.38    0.03  1.0000
   0  -4  -4 5988646  238743                                                     5087845  -11.38   -0.03  1.0000
   0  -4  -5 7116103  270171                                                     6096653   11.75    0.03  1.0000
   0  -4  -5 6995287  311608                                                     5984859   11.75    0.03  1.0000
   0   4   5 6931907  254923                                                     5926854   11.75   -0.03  1.0000
   0  -4  -5 6764201  290357                                                     5771250   11.75    0.03  1.0000
   0   4   5 6991936  258654                                                     5982374   11.75   -0.03  1.0000
   0   4   5 6944834  293643                                                     5938809   11.75   -0.03  1.0000
   0  -4  -5 6613843  236995                                                     5632424   11.75    0.03  1.0000
   0   4   5 7528571  319493                                                     6479524   11.75   -0.03  1.0000
   0  -4  -6 1496096  186871                                                     1917339   -9.67   -0.07  1.0000
   0   4   6 1482927  152710                                                     1901284   -9.67    0.07  1.0000
   0  -4  -6 1612260  190722                                                     2048592   -9.67   -0.07  1.0000
   0   4   6 1511524  186038                                                     1933657   -9.67    0.07  1.0000
   0  -4  -6 1557415  162784                                                     1986693   -9.67   -0.07  1.0000
   0  -4  -6 1469612  148235                                                     1887333   -9.67   -0.07  1.0000
   0   4   6 1564341  158534                                                     1993355   -9.67    0.07  1.0000
   0   4   6 1263426  183308                                                     1651496   -9.67    0.07  1.0000
   0   4   6 1656567  179235                                                     2097323   -9.67    0.07  1.0000
   0  -4  -7 6969835  391600                                                     7808229    9.15    0.10  1.0000
   0   4   7 7787066  408375                                                     8669045    9.15   -0.10  1.0000
   0  -4  -7 7230479  324620                                                     8083972    9.15    0.10  1.0000
   0   4   7 7936966  344988                                                     8827173    9.15   -0.10  1.0000
   0   4   7 7400413  331068                                                     8260796    9.15   -0.10  1.0000
   0   4   7 7739681  430923                                                     8619042    9.15   -0.10  1.0000
   0   4   7 8061624  378316                                                     8958612    9.15   -0.10  1.0000
   0  -4  -7 8152762  359659                                                     9057610    9.15    0.10  1.0000
   0  -4  -7 7183620  376587                                                     8034419    9.15    0.10  1.0000
   0  -4  -8  283218   65354                                                      127406  -10.35   -0.11  1.0000
   0   4   8  554492   96086                                                      323906  -10.35    0.11  1.0000
   0   4   8  664323   81712                                                      409033  -10.35    0.11  1.0000
   0  -4  -8  380835   47490                                                      195296  -10.35   -0.11  1.0000
   0   4   8  441471   71366                                                      239026  -10.35    0.11  1.0000
   0  -4  -8  465670   59760                                                      257285  -10.35   -0.11  1.0000
   0  -4  -8  461695   81055                                                      254332  -10.35   -0.11  1.0000
   0   4   8  639954   95198                                                      389957  -10.35    0.11  1.0000
   0   4   8  540180   71880                                                      312988  -10.35    0.11  1.0000
   0   4   9 1812664  146416                                                     1353574   10.77   -0.07  1.0000
   0   4   9 1898222  165316                                                     1427643   10.77   -0.07  1.0000
   0   4   9 1774140  184019                                                     1320310   10.77   -0.07  1.0000
   0  -4  -9 1706052  147179                                                     1261415   10.77    0.07  1.0000
   0   4   9 2136857  192121                                                     1635539   10.77   -0.07  1.0000
   0  -4  -9 1693134  171714                                                     1250311   10.77    0.07  1.0000
   0  -4  -9 1740815  168267                                                     1291332   10.77    0.07  1.0000
   0   4   9 1930937  155825                                                     1456035   10.77   -0.07  1.0000
   0   4  10  170138   76310                                                      333065   -9.73    0.02  1.0000
   0  -4 -10   94645   64667                                                      223031   -9.73   -0.02  1.0000
   0   4  10  142830   51694                                                      294358   -9.73    0.02  1.0000
   0   4  10  155418  100656                                                      312325   -9.73    0.02  1.0000
   0   4  10  199873   81730                                                      374213   -9.73    0.02  1.0000
   0  -4 -10  123219   76517                                                      265923   -9.73   -0.02  1.0000
   0   4  10  138423   82310                                                      288014   -9.73    0.02  1.0000
   0  -4 -10   79211   81352                                                      198948   -9.73   -0.02  1.0000
   0   4  11  567706   67707                                                      395935    7.48    0.00  1.0000
   0   4  11  357722   80059                                                      224402    7.48    0.00  1.0000
   0   4  11  539827   95404                                                      372691    7.48    0.00  1.0000
   0  -4 -11  490535   88457                                                      331871    7.48    0.00  1.0000
   0   4  11  460492   77510                                                      307248    7.48    0.00  1.0000
   0  -4 -11  419541   95800                                                      273914    7.48    0.00  1.0000
   0  -4 -11  405470   72161                                                      262555    7.48    0.00  1.0000
   0   4  12  723103  100876                                                      602927   -4.51    0.02  1.0000
   0   4  12  714764   82707                                                      595311   -4.51    0.02  1.0000
   0  -4 -12  686963  113325                                                      569622   -4.51   -0.02  1.0000
   0  -4 -12  836394  145376                                                      706391   -4.51   -0.02  1.0000
   0   4  12  798164  152723                                                      671650   -4.51    0.02  1.0000
   0  -4 -12  768655  125909                                                      644239   -4.51   -0.02  1.0000
   0  -4 -13 1295478  194076                                                     1220031    1.98    0.03  1.0000
   0   4  13 1257275  209184                                                     1183060    1.98   -0.03  1.0000
   0   4  13 1068368  113377                                                     1000043    1.98   -0.03  1.0000
   0  -4 -13  985634  143275                                                      919969    1.98    0.03  1.0000
   0   4  13 1048757  131064                                                      981073    1.98   -0.03  1.0000
   0  -4 -14  399776  115560                                                      405625   -0.27   -0.01  1.0000
   0   4  14  419234   70510                                                      425166   -0.27    0.01  1.0000
   0  -4 -14  450323  102569                                                      456529   -0.27   -0.01  1.0000
   0   4  14  451939  139103                                                      458098   -0.27    0.01  1.0000
   0   4  14  564379  112321                                                      571259   -0.27    0.01  1.0000
   0   4  15     330   74406                                                      -28983   -1.07   -0.01  1.0000
   0   4  15     330   29293                                                      -23341   -1.07   -0.01  1.0000
   0  -4 -15   62893   50858                                                       55848   -1.07    0.01  1.0000
   0   4  15     330   35322                                                      -13546   -1.07   -0.01  1.0000
   0  -4 -15   85451   80852                                                       77225   -1.07    0.01  1.0000
   0   4  15   24497   57716                                                       20083   -1.07   -0.01  1.0000
   0  -4 -16 3751239  358318                                                     3655133    1.47   -0.03  1.0000
   0   4  16 3812852  297297                                                     3715634    1.47    0.03  1.0000
   0  -4 -16 3760813  331105                                                     3664584    1.47   -0.03  1.0000
   0   4  16 3755091  243491                                                     3658616    1.47    0.03  1.0000
   0   4  16 3831107  221902                                                     3733654    1.47    0.03  1.0000
   0   4  16 3775052  403646                                                     3678320    1.47    0.03  1.0000
   0   4  16 3710775  392097                                                     3614875    1.47    0.03  1.0000
   0  -4 -17  541529  155721                                                      530534   -0.46    0.03  1.0000
   0   4  17  325404   64896                                                      316599   -0.46   -0.03  1.0000
   0   4  17  403325   99886                                                      393515   -0.46   -0.03  1.0000
   0   4  17  273859  110958                                                      265786   -0.46   -0.03  1.0000
   0  -4 -17  426573  122000                                                      416820   -0.46    0.03  1.0000
   0   4  17  349895   82053                                                      340761   -0.46   -0.03  1.0000
   0   4  17  278163   93087                                                      270026   -0.46   -0.03  1.0000
   0  -4 -18 1687603  263933                                                     1664361   -0.53    0.00  1.0000
   0   4  18 1487944  201756                                                     1466131   -0.53    0.00  1.0000
   0   4  18 1484504  278262                                                     1462717   -0.53    0.00  1.0000
   0   4  18 1453171  267884                                                     1431615   -0.53    0.00  1.0000
   0  -4 -18 1537167  237392                                                     1514989   -0.53    0.00  1.0000
   0   4  18 1581140  174072                                                     1558652   -0.53    0.00  1.0000
   0  -4 -19 1340651  221289                                                     1329223    0.30    0.00  1.0000
   0   4  19 1290126  253391                                                     1278927    0.30    0.00  1.0000
   0   4  19 1556613  286550                                                     1544310    0.30    0.00  1.0000
   0   4  19 1442068  172065                                                     1430226    0.30    0.00  1.0000
   0  -4 -19 1378517  246108                                                     1366928    0.30    0.00  1.0000
   0   4  19 1394284  199546                                                     1382640    0.30    0.00  1.0000
   0   4  20  377033   94894                                                      383832    0.32    0.03  1.0000
   0   4  20  379197  105405                                                      386014    0.32    0.03  1.0000
   0   4  20  153285   71870                                                      157631    0.32    0.03  1.0000
   0  -4 -20  310897  122894                                                      316932    0.32   -0.03  1.0000
   0   4  20  289517  127214                                                      295478    0.32    0.03  1.0000
   0  -4 -20  369298  141348                                                      375873    0.32   -0.03  1.0000
   0   4  21   73544   90963                                                       70298   -0.36   -0.04  1.0000
   0   4  21   50804   69885                                                       48112   -0.36   -0.04  1.0000
   0  -4 -21  115678   86590                                                      111949   -0.36    0.04  1.0000
   0  -4 -21    1866   74224                                                        1413   -0.36    0.04  1.0000
   0   4  21   17587   86730                                                       16017   -0.36   -0.04  1.0000
   0   4  21   88367   61467                                                       84805   -0.36   -0.04  1.0000
   0   4  22  552893  206146                                                      549768    0.12    0.02  1.0000
   0   4  22  750593  232133                                                      746952    0.12    0.02  1.0000
   0  -4 -22  790382  194331                                                      786713    0.12   -0.02  1.0000
   0  -4 -22  632983  164376                                                      629700    0.12   -0.02  1.0000
   0   4  22  587255  130731                                                      584035    0.12    0.02  1.0000
   0   4  22 1021697  166086                                                     1017448    0.12    0.02  1.0000
   0  -4 -23  225749  133209                                                      223473   -0.14    0.00  1.0000
   0   4  23   59270   98690                                                       58102   -0.14    0.00  1.0000
   0   4  23  337520  195608                                                      334726   -0.14    0.00  1.0000
   0   4  23       6   81530                                                       -4989   -0.14    0.00  1.0000
   0  -4 -23   25186  100229                                                       24429   -0.14    0.00  1.0000
   0   4  24  196230  146044                                                      189131    0.49   -0.01  1.0000
   0  -4 -24  345201  135585                                                      335674    0.49    0.01  1.0000
   0  -4 -24  355492  174918                                                      345823    0.49    0.01  1.0000
   0   4  24   50238  106182                                                       46676    0.49   -0.01  1.0000
   0   4  24  161232   67596                                                      154802    0.49   -0.01  1.0000
   0  -4 -25  182504  101182                                                      171935   -0.75   -0.01  1.0000
   0   4  25   52012   60966                                                       46457   -0.75    0.01  1.0000
   0   4  25   36952  106928                                                       32295   -0.75    0.01  1.0000
   0  -4 -25   31237   92840                                                       26956   -0.75   -0.01  1.0000
   0   4  26  590487  176583                                                      597456    0.27    0.00  1.0000
   0  -4 -26  325157  147617                                                      330323    0.27    0.00  1.0000
   0  -4 -26  273427  161129                                                      278166    0.27    0.00  1.0000
   0   4  26  792411  261006                                                      800481    0.27    0.00  1.0000
   0   4  27  680179  240170                                                      663412    0.61   -0.01  1.0000
   0  -4 -27  697612  220267                                                      680538    0.61    0.01  1.0000
   0   4  27  376454  154604                                                      364006    0.61   -0.01  1.0000
   0  -4 -27  529937  191027                                                      515069    0.61    0.01  1.0000
   0   4  28   71219   97710                                                       65657   -0.63    0.01  1.0000
   0  -4 -28  107862  149940                                                      100979   -0.63   -0.01  1.0000
   0   4  28  389637  220059                                                      376478   -0.63    0.01  1.0000
   0  -4 -28  149720  101005                                                      141590   -0.63   -0.01  1.0000
   0  -4 -29      55   84207                                                      -29618   -0.44    0.00  1.0000
   0  -4 -29      55  111600                                                        -157   -0.44    0.00  1.0000
   0  -4 -30  150699   96780                                                      132998    1.38    0.01  1.0000
   0  -4 -31  286104  154658                                                      257117   -1.66   -0.01  1.0000
   0  -5  31    7236   78308                                                        5510   -0.64   -0.03  1.0000
   0  -5  30     279  119589                                                     -158482    0.98    0.00  1.0000
   0  -5  29  184584  109041                                                      184659    0.00   -0.01  1.0000
   0  -5  29   95223   83538                                                       95277    0.00   -0.01  1.0000
   0  -5  28  237622  134855                                                      215430   -1.39    0.03  1.0000
   0  -5  28    2270  109016                                                         584   -1.39    0.03  1.0000
   0   5 -28     559  141513                                                     -173337   -1.39   -0.03  1.0000
   0  -5  28   53156   87941                                                       42939   -1.39    0.03  1.0000
   0   5 -27   38727   83426                                                       48474    1.38    0.01  1.0000
   0  -5  27  173903  166328                                                      193970    1.38   -0.01  1.0000
   0  -5  27   61638   79258                                                       73806    1.38   -0.01  1.0000
   0  -5  27  159785  114697                                                      179043    1.38   -0.01  1.0000
   0  -5  26  305893  135269                                                      318321   -0.66   -0.02  1.0000
   0  -5  26  414358  158261                                                      428803   -0.66   -0.02  1.0000
   0  -5  26  353918  191335                                                      367277   -0.66   -0.02  1.0000
   0   5 -26  309508  135515                                                      321924   -0.66    0.02  1.0000
   0   5 -25 1230922  272883                                                     1264614    0.90   -0.02  1.0000
   0  -5  25 1322268  296027                                                     1357389    0.90    0.02  1.0000
   0   5 -25 1271011  253933                                                     1305244    0.90   -0.02  1.0000
   0  -5  25 1029198  227858                                                     1060211    0.90    0.02  1.0000
   0  -5  25  952203  228238                                                      982042    0.90    0.02  1.0000
   0  -5  24   19782   93042                                                       25643   -1.38   -0.01  1.0000
   0   5 -24     547  102466                                                      -74035   -1.38    0.01  1.0000
   0  -5  24     547   90354                                                      -19000   -1.38   -0.01  1.0000
   0  -5  24     547  122022                                                      -54214   -1.38   -0.01  1.0000
   0   5 -24     547   99502                                                      -57763   -1.38    0.01  1.0000
   0  -5  23 1629884  273118                                                     1605818    0.56    0.02  1.0000
   0   5 -23 1610968  269813                                                     1587268    0.56   -0.02  1.0000
   0  -5  23 1215108  279713                                                     1194340    0.56    0.02  1.0000
   0  -5  23 1297731  236920                                                     1276266    0.56    0.02  1.0000
   0   5 -23 1284120  270058                                                     1262970    0.56   -0.02  1.0000
   0  -5  22     250   83165                                                       -5514    0.93   -0.04  1.0000
   0   5 -22  148436  119949                                                      159997    0.93    0.04  1.0000
   0   5 -22     250  106082                                                     -129999    0.93    0.04  1.0000
   0  -5  22  158224  136375                                                      169759    0.93   -0.04  1.0000
   0  -5  22  157611  109453                                                      169124    0.93   -0.04  1.0000
   0   5 -21  802056  200265                                                      756265   -1.53   -0.03  1.0000
   0  -5  21  934741  190741                                                      885308   -1.53    0.03  1.0000
   0   5 -21  907543  188035                                                      858791   -1.53   -0.03  1.0000
   0  -5  21  975178  233300                                                      924672   -1.53    0.03  1.0000
   0  -5  21  909109  199100                                                      860367   -1.53    0.03  1.0000
   0  -5  20  688607  196001                                                      713922    0.90   -0.03  1.0000
   0   5 -20  977267  232991                                                     1007674    0.90    0.03  1.0000
   0  -5  20  886482  195153                                                      915176    0.90   -0.03  1.0000
   0   5 -20  781258  176921                                                      808470    0.90    0.03  1.0000
   0  -5  20  716605  178688                                                      742425    0.90   -0.03  1.0000
   0  -5  19  166508  130026                                                      165686    0.06    0.02  1.0000
   0  -5  19  362683  132442                                                      361469    0.06    0.02  1.0000
   0   5 -19  471629  156617                                                      470494    0.06   -0.02  1.0000
   0   5 -19  360345  116041                                                      359354    0.06   -0.02  1.0000
   0  -5  19  390317  135891                                                      389058    0.06    0.02  1.0000
   0  -5  18   93071   84441                                                       94784   -0.33    0.01  1.0000
   0  -5  18  165776  119941                                                      168067   -0.33    0.01  1.0000
   0   5 -18      31   61508                                                       -5060   -0.33   -0.01  1.0000
   0   5 -18  158670   85084                                                      161233   -0.33   -0.01  1.0000
   0  -5  18   44354   76488                                                       45532   -0.33    0.01  1.0000
   0  -5  17 6266584  448725                                                     6273654    0.09   -0.04  1.0000
   0  -5  17 6658864  455545                                                     6666151    0.09   -0.04  1.0000
   0   5 -17 6617666  482280                                                     6625629    0.09    0.04  1.0000
   0  -5  17 5878281  484514                                                     5885128    0.09   -0.04  1.0000
   0   5 -17 6544628  458682                                                     6552547    0.09    0.04  1.0000
   0   5 -17 6064533  196885                                                     6072156    0.09    0.04  1.0000
   0  -5  16  201020  100132                                                      209737   -0.57    0.03  1.0000
   0   5 -16  111028   58205                                                      117518   -0.57   -0.03  1.0000
   0   5 -16      93   90838                                                       -3711   -0.57   -0.03  1.0000
   0   5 -16  197498   45001                                                      206124   -0.57   -0.03  1.0000
   0  -5  16   38048   55328                                                       41892   -0.57    0.03  1.0000
   0  -5  16   49472   85797                                                       53843   -0.57    0.03  1.0000
   0   5 -15  873558  148818                                                      827339    1.47    0.04  1.0000
   0  -5  15  851144  152906                                                      805634    1.47   -0.04  1.0000
   0   5 -15  885092   86984                                                      838564    1.47    0.04  1.0000
   0   5 -15  597362  135544                                                      559250    1.47    0.04  1.0000
   0  -5  15  855024  146595                                                      809410    1.47   -0.04  1.0000
   0  -5  15  874571  169803                                                      828432    1.47   -0.04  1.0000
   0   5 -14  696666  145234                                                      673675   -0.82   -0.06  1.0000
   0   5 -14  735965   87069                                                      712329   -0.82   -0.06  1.0000
   0  -5  14  767011  141473                                                      743004   -0.82    0.06  1.0000
   0   5 -14  743984  130258                                                      720218   -0.82   -0.06  1.0000
   0   5 -14  755535  170206                                                      731584   -0.82   -0.06  1.0000
   0  -5  14  650053  119053                                                      627967   -0.82    0.06  1.0000
   0  -5  13  611527  129928                                                      651362   -1.52   -0.05  1.0000
   0   5 -13  670758  153521                                                      711667   -1.52    0.05  1.0000
   0  -5  13  738578  136858                                                      782298   -1.52   -0.05  1.0000
   0   5 -13  635626  128199                                                      675463   -1.52    0.05  1.0000
   0  -5  13  659016  119393                                                      700347   -1.52   -0.05  1.0000
   0   5 -13  762594   92805                                                      806178   -1.52    0.05  1.0000
   0   5 -13  381196  118806                                                      412168   -1.52    0.05  1.0000
   0   5 -12  577240  151103                                                      656546    3.06   -0.02  1.0000
   0  -5  12  735178  132078                                                      824636    3.06    0.02  1.0000
   0   5 -12  652863   90776                                                      737052    3.06   -0.02  1.0000
   0   5 -12  549664  118260                                                      627111    3.06   -0.02  1.0000
   0   5 -12  649006  135726                                                      732953    3.06   -0.02  1.0000
   0  -5  12  627813  129138                                                      710665    3.06    0.02  1.0000
   0  -5  12  688511  136236                                                      775161    3.06    0.02  1.0000
   0   5 -11 3301735  261529                                                     3161887   -2.30    0.03  1.0000
   0   5 -11 3427695  313973                                                     3285176   -2.30    0.03  1.0000
   0   5 -11 3693639  204443                                                     3545638   -2.30    0.03  1.0000
   0  -5  11 3342243  271846                                                     3201098   -2.30   -0.03  1.0000
   0  -5  11 3615075  259723                                                     3468223   -2.30   -0.03  1.0000
   0  -5  11 3042309  243372                                                     2907716   -2.30   -0.03  1.0000
   0   5 -11 3751071  287555                                                     3601912   -2.30    0.03  1.0000
   0   5 -10 2076965  158478                                                     2060146    0.35   -0.05  1.0000
   0  -5  10 1863966  180998                                                     1847398    0.35    0.05  1.0000
   0   5 -10 1764762  221900                                                     1749261    0.35   -0.05  1.0000
   0  -5  10 1665217  183536                                                     1649559    0.35    0.05  1.0000
   0  -5  10 2008717  190246                                                     1991516    0.35    0.05  1.0000
   0   5 -10 1825458  193432                                                     1809693    0.35   -0.05  1.0000
   0   5 -10 2155960  213023                                                     2138824    0.35   -0.05  1.0000
   0  -5   9  986936  127122                                                      960136    0.80    0.01  1.0000
   0  -5   9  815011  116917                                                      790674    0.80    0.01  1.0000
   0   5  -9  942196  125211                                                      916045    0.80   -0.01  1.0000
   0   5  -9  794244  137096                                                      770249    0.80   -0.01  1.0000
   0   5  -9  914541  131319                                                      888780    0.80   -0.01  1.0000
   0  -5   9  826813  113366                                                      802298    0.80    0.01  1.0000
   0  -5   8  123533   63872                                                      119787   -0.37   -0.07  1.0000
   0   5  -8  328958   94162                                                      321854   -0.37    0.07  1.0000
   0   5  -8  219441   67770                                                      213646   -0.37    0.07  1.0000
   0  -5   8  243310   69635                                                      238046   -0.37   -0.07  1.0000
   0  -5   8  264157   83229                                                      258671   -0.37   -0.07  1.0000
   0   5  -8  266939   96886                                                      260543   -0.37    0.07  1.0000
   0   5  -8  318942  104879                                                      311948   -0.37    0.07  1.0000
   0  -5   8  228763   80615                                                      223660   -0.37   -0.07  1.0000
   0  -5   8   92014   52262                                                       88784   -0.37   -0.07  1.0000
   0   5  -8  261381   82552                                                      255053   -0.37    0.07  1.0000
   0  -5   7 8011738  338824                                                     8013689    0.02    0.04  1.0000
   0   5  -7 8735055  414146                                                     8736452    0.02   -0.04  1.0000
   0   5  -7 8008956  416815                                                     8010294    0.02   -0.04  1.0000
   0  -5   7 8407338  371214                                                     8409336    0.02    0.04  1.0000
   0   5  -7 8274374  373381                                                     8275735    0.02   -0.04  1.0000
   0  -5   7 8196014  323948                                                     8197987    0.02    0.04  1.0000
   0  -5   7 8885199  375404                                                     8887252    0.02    0.04  1.0000
   0  -5   7 8211646  371758                                                     8213621    0.02    0.04  1.0000
   0   5  -7 8162414  367145                                                     8163765    0.02   -0.04  1.0000
   0   5  -7 7506712  337750                                                     7508008    0.02   -0.04  1.0000
   0  -5   6 6821268  311519                                                     6699904   -1.39    0.03  1.0000
   0   5  -6 6359575  311371                                                     6241672   -1.39   -0.03  1.0000
   0  -5   6 6344771  310438                                                     6227740   -1.39    0.03  1.0000
   0   5  -6 6356483  308287                                                     6238610   -1.39   -0.03  1.0000
   0   5  -6 6408397  296768                                                     6290041   -1.39   -0.03  1.0000
   0  -5   6 6487079  291306                                                     6368738   -1.39    0.03  1.0000
   0  -5   6 6909221  312012                                                     6787073   -1.39    0.03  1.0000
   0  -5   6 6364856  269036                                                     6247640   -1.39    0.03  1.0000
   0   5  -510961926  390534                                                    10762943    1.78    0.06  1.0000
   0  -5   511225239  395279                                                    11025724    1.78   -0.06  1.0000
   0  -5   511517025  386165                                                    11314919    1.78   -0.06  1.0000
   0   5  -511436688  395670                                                    11233424    1.78    0.06  1.0000
   0  -5   511207669  331645                                                    11008309    1.78   -0.06  1.0000
   0   5  -511436688  339395                                                    11233424    1.78    0.06  1.0000
   0   5  -510682294  368885                                                    10485879    1.78    0.06  1.0000
   0  -5   511528867  393484                                                    11326659    1.78   -0.06  1.0000
   0  -5   511283581  369802                                                    11083543    1.78   -0.06  1.0000
   0   5  -4  260364   58094                                                      228555    2.02   -0.04  1.0000
   0   5  -4  265965   46396                                                      233806    2.02   -0.04  1.0000
   0   5  -4  270974   57888                                                      238506    2.02   -0.04  1.0000
   0  -5   4  247288   44437                                                      215919    2.02    0.04  1.0000
   0  -5   4  313876   63375                                                      278415    2.02    0.04  1.0000
   0  -5   4  272479   61544                                                      239504    2.02    0.04  1.0000
   0   5  -4  286318   59932                                                      252918    2.02   -0.04  1.0000
   0  -5   4  380143   64776                                                      341024    2.02    0.04  1.0000
   0   5  -3 4892147  228687                                                     4443494   -6.13    0.01  1.0000
   0  -5   3 4548792  176211                                                     4116418   -6.13   -0.01  1.0000
   0  -5   3 5039077  233887                                                     4583435   -6.13   -0.01  1.0000
   0  -5   3 4625268  223406                                                     4189186   -6.13   -0.01  1.0000
   0  -5   3 4793259  214899                                                     4349134   -6.13   -0.01  1.0000
   0   5  -3 4889673  182668                                                     4441137   -6.13    0.01  1.0000
   0   5  -3 4853864  230068                                                     4407012   -6.13    0.01  1.0000
   0   5  -3 4558533  213867                                                     4125820   -6.13    0.01  1.0000
   0  -5   2  179671   53648                                                      253549    4.73    0.02  1.0000
   0   5  -2  233712   62905                                                      317011    4.73   -0.02  1.0000
   0   5  -2  177382   51487                                                      250752    4.73   -0.02  1.0000
   0   5  -2  168983   41316                                                      240743    4.73   -0.02  1.0000
   0  -5   2  141782   49050                                                      208104    4.73    0.02  1.0000
   0  -5   2  209313   58805                                                      288558    4.73    0.02  1.0000
   0   5  -2  259046   62702                                                      346417    4.73   -0.02  1.0000
   0  -5   1 3449444  168288                                                     3411235   -0.61   -0.03  1.0000
   0   5  -1 3860817  192105                                                     3820902   -0.61    0.03  1.0000
   0  -5   1 3481998  182347                                                     3443608   -0.61   -0.03  1.0000
   0   5  -1 3463938  207569                                                     3426135   -0.61    0.03  1.0000
   0   5  -1 3046168  159916                                                     3010724   -0.61    0.03  1.0000
   0  -5   1 3279550  197699                                                     3242296   -0.61   -0.03  1.0000
   0  -5   028179406  602809                                                    28233050   -0.30    0.02  1.0000
   0  -5   028750800  449667                                                    28804984   -0.30    0.02  1.0000
   0   5   027424642  450794                                                    27478168   -0.30   -0.02  1.0000
   0  -5   027243252  488151                                                    27296002   -0.30    0.02  1.0000
   0   5   029273098  506033                                                    29328392   -0.30   -0.02  1.0000
   0   5   027481818  592880                                                    27535400   -0.30   -0.02  1.0000
   0   5   1 4577311  192649                                                     4565297    0.16    0.04  1.0000
   0  -5  -1 4292149  249117                                                     4281071    0.16   -0.04  1.0000
   0   5   1 3985113  235919                                                     3973904    0.16    0.04  1.0000
   0  -5  -1 4236753  190899                                                     4225747    0.16   -0.04  1.0000
   0   5   1 4166699  169393                                                     4155238    0.16    0.04  1.0000
   0  -5  -1 4223498  167726                                                     4212510    0.16   -0.04  1.0000
   0  -5  -263203288  846687                                                    62264196   -3.50    0.08  1.0000
   0  -5  -265605532  716406                                                    64648688   -3.50    0.08  1.0000
   0   5   267615808  642149                                                    66641748   -3.50   -0.08  1.0000
   0   5   268420424  690271                                                    67440560   -3.50   -0.08  1.0000
   0   5   266886164  985740                                                    65917392   -3.50   -0.08  1.0000
   0  -5  -3 1187101  107065                                                     1473126    7.30   -0.11  1.0000
   0   5   3  975895  142950                                                     1236555    7.30    0.11  1.0000
   0   5   3 1182821  103068                                                     1468234    7.30    0.11  1.0000
   0  -5  -3 1175002  161102                                                     1459645    7.30   -0.11  1.0000
   0  -5  -3 1195551  129013                                                     1482538    7.30   -0.11  1.0000
   0   5   3 1016460  141935                                                     1282165    7.30    0.11  1.0000
   0   5   3 1068875   96324                                                     1340953    7.30    0.11  1.0000
   0   5   4 2200830  206601                                                     2587742   -7.37   -0.07  1.0000
   0  -5  -4 2277319  189677                                                     2670255   -7.37    0.07  1.0000
   0  -5  -4 2107599  164808                                                     2486201   -7.37    0.07  1.0000
   0   5   4 2204619  132039                                                     2591851   -7.37   -0.07  1.0000
   0   5   4 2186856  181537                                                     2572587   -7.37   -0.07  1.0000
   0   5   4 2181778  212239                                                     2567079   -7.37   -0.07  1.0000
   0  -5  -4 1703798  189208                                                     2045774   -7.37    0.07  1.0000
   0  -5  -5 3836384  243347                                                     3432161    6.25    0.02  1.0000
   0  -5  -5 3959467  200910                                                     3548632    6.25    0.02  1.0000
   0   5   5 4001303  254353                                                     3588431    6.25   -0.02  1.0000
   0   5   5 4060114  153848                                                     3644137    6.25   -0.02  1.0000
   0  -5  -5 4336901  236251                                                     3906409    6.25    0.02  1.0000
   0   5   5 4228136  224653                                                     3803410    6.25   -0.02  1.0000
   0   5   5 4775528  270447                                                     4323443    6.25   -0.02  1.0000
   0   5   6 5515348  348707                                                     6111240   -7.30    0.10  1.0000
   0  -5  -6 4996673  324534                                                     5565770   -7.30   -0.10  1.0000
   0  -5  -6 5215038  269950                                                     5796109   -7.30   -0.10  1.0000
   0   5   6 5789689  343355                                                     6399849   -7.30    0.10  1.0000
   0   5   6 5597849  291226                                                     6198068   -7.30    0.10  1.0000
   0  -5  -6 5455537  343554                                                     6049508   -7.30   -0.10  1.0000
   0  -5  -6 5394210  300163                                                     5984918   -7.30   -0.10  1.0000
   0   5   711585273  434876                                                    12625495    8.86   -0.13  1.0000
   0   5   710572530  513624                                                    11567232    8.86   -0.13  1.0000
   0  -5  -710646173  399136                                                    11647455    8.86    0.13  1.0000
   0   5   711065968  422596                                                    12083107    8.86   -0.13  1.0000
   0  -5  -711219951  510174                                                    12247271    8.86    0.13  1.0000
   0   5   711440222  513818                                                    12474049    8.86   -0.13  1.0000
   0  -5  -711188303  487439                                                    12214204    8.86    0.13  1.0000
   0  -5  -710878188  437309                                                    11890082    8.86    0.13  1.0000
   0   5   711449684  478971                                                    12483930    8.86   -0.13  1.0000
   0   5   8 1453763  175849                                                     1118754   -8.71    0.12  1.0000
   0  -5  -8 1696977  156792                                                     1333068   -8.71   -0.12  1.0000
   0  -5  -8 1467851  166769                                                     1130934   -8.71   -0.12  1.0000
   0   5   8 1808254  152978                                                     1432105   -8.71    0.12  1.0000
   0  -5  -8 1497445  156410                                                     1156929   -8.71   -0.12  1.0000
   0   5   8 1752420  172875                                                     1382464   -8.71    0.12  1.0000
   0   5   8 1603547  147889                                                     1250604   -8.71    0.12  1.0000
   0  -5  -8 1767673  148326                                                     1395808   -8.71   -0.12  1.0000
   0   5   9 4946377  307560                                                     4412638    7.31   -0.07  1.0000
   0  -5  -9 5072814  317867                                                     4530928    7.31    0.07  1.0000
   0   5   9 4964275  278273                                                     4429543    7.31   -0.07  1.0000
   0  -5  -9 4535526  262134                                                     4023965    7.31    0.07  1.0000
   0   5   9 4914566  343957                                                     4382593    7.31   -0.07  1.0000
   0   5   9 4656773  262646                                                     4139340    7.31   -0.07  1.0000
   0  -5  -9 4789023  281861                                                     4262943    7.31    0.07  1.0000
   0  -5  -9 5120756  339929                                                     4576245    7.31    0.07  1.0000
   0  -5 -10 2781257  239327                                                     3100731   -5.48   -0.03  1.0000
   0  -5 -10 3041123  289970                                                     3374792   -5.48   -0.03  1.0000
   0   5  10 3356573  285437                                                     3706682   -5.48    0.03  1.0000
   0   5  10 2615592  299498                                                     2925668   -5.48    0.03  1.0000
   0   5  10 2892011  243713                                                     3217613   -5.48    0.03  1.0000
   0  -5 -10 2675627  286620                                                     2989142   -5.48   -0.03  1.0000
   0   5  11 1261241  198479                                                     1129770    3.55    0.00  1.0000
   0   5  11 1535724  118173                                                     1390281    3.55    0.00  1.0000
   0   5  11 1704570  174585                                                     1551148    3.55    0.00  1.0000
   0  -5 -11 1619343  200738                                                     1469907    3.55    0.00  1.0000
   0  -5 -11 1469520  168368                                                     1327335    3.55    0.00  1.0000
   0  -5 -11 1450741  196672                                                     1309490    3.55    0.00  1.0000
   0   5  1214620293  394620                                                    14376810   -1.88   -0.02  1.0000
   0  -5 -1215267745  567532                                                    15019380   -1.88    0.02  1.0000
   0   5  1213851066  696717                                                    13614101   -1.88   -0.02  1.0000
   0   5  1215407796  552628                                                    15157814   -1.88   -0.02  1.0000
   0  -5 -1215614442  656902                                                    15363264   -1.88    0.02  1.0000
   0  -5 -1215059510  667254                                                    14812854   -1.88    0.02  1.0000
   0   5  13 8264036  552335                                                     8287984    0.24    0.03  1.0000
   0  -5 -13 8321593  517840                                                     8345324    0.24   -0.03  1.0000
   0   5  13 8389288  319989                                                     8413416    0.24    0.03  1.0000
   0   5  13 9071976  446566                                                     9097066    0.24    0.03  1.0000
   0  -5 -13 8814079  460793                                                     8838502    0.24   -0.03  1.0000
   0  -5 -13 9379872  533370                                                     9405065    0.24   -0.03  1.0000
   0  -5 -1416245667  750597                                                    16062089    1.35   -0.01  1.0000
   0   5  1417691346  828848                                                    17499456    1.35    0.01  1.0000
   0  -5 -1416858806  658666                                                    16671786    1.35   -0.01  1.0000
   0   5  1417290384  473879                                                    17100688    1.35    0.01  1.0000
   0   5  1417825124  635456                                                    17632510    1.35    0.01  1.0000
   0   5  15  512602  118023                                                      467278   -1.91   -0.06  1.0000
   0  -5 -15  494716  128958                                                      450458   -1.91    0.06  1.0000
   0  -5 -15  523159  144899                                                      477618   -1.91    0.06  1.0000
   0   5  15  533820   90365                                                      487546   -1.91   -0.06  1.0000
   0   5  15  451142  155789                                                      408686   -1.91   -0.06  1.0000
   0   5  16 3102424  285136                                                     3192509    1.49    0.07  1.0000
   0   5  16 2692505  350897                                                     2776472    1.49    0.07  1.0000
   0   5  16 2747328  211331                                                     2832139    1.49    0.07  1.0000
   0  -5 -16 2920042  336820                                                     3006635    1.49   -0.07  1.0000
   0   5  16 2803056  220953                                                     2888716    1.49    0.07  1.0000
   0  -5 -16 2742411  289396                                                     2826348    1.49   -0.07  1.0000
   0   5  17   38578   49861                                                       28424   -1.64   -0.03  1.0000
   0   5  17     778   52794                                                      -33758   -1.64   -0.03  1.0000
   0  -5 -17     778   78090                                                      -76208   -1.64    0.03  1.0000
   0  -5 -17   24596   58762                                                       16667   -1.64    0.03  1.0000
   0   5  17     778  103083                                                       -6168   -1.64   -0.03  1.0000
   0   5  17  101124   68515                                                       84209   -1.64   -0.03  1.0000
   0   5  17     778   60870                                                      -28646   -1.64   -0.03  1.0000
   0  -5 -18    1733   71506                                                      -25314    2.45    0.00  1.0000
   0   5  18    1733   32986                                                      -32667    2.45    0.00  1.0000
   0   5  18   30063   97192                                                       44169    2.45    0.00  1.0000
   0   5  18    1733   81437                                                      -61192    2.45    0.00  1.0000
   0   5  18    1733   82477                                                      -47896    2.45    0.00  1.0000
   0  -5 -18    1733   60346                                                       -3812    2.45    0.00  1.0000
   0   5  19 1655285  223451                                                     1762860   -2.45   -0.01  1.0000
   0   5  19 1846213  194634                                                     1959730   -2.45   -0.01  1.0000
   0   5  19 1562971  299472                                                     1667550   -2.45   -0.01  1.0000
   0  -5 -19 1497303  270834                                                     1599605   -2.45    0.01  1.0000
   0   5  19 1598610  299719                                                     1704355   -2.45   -0.01  1.0000
   0  -5 -19 1282750  225916                                                     1377562   -2.45    0.01  1.0000
   0   5  20  216140  104188                                                      240132    1.48    0.00  1.0000
   0  -5 -20  217848  106862                                                      241940    1.48    0.00  1.0000
   0   5  20  206873  136743                                                      230359    1.48    0.00  1.0000
   0   5  20  323477   82882                                                      352688    1.48    0.00  1.0000
   0  -5 -20  338734  120954                                                      368622    1.48    0.00  1.0000
   0   5  20  289143  109260                                                      316794    1.48    0.00  1.0000
   0  -5 -21   68831   68831                                                       62582   -0.78   -0.03  1.0000
   0   5  21     175  114003                                                      -24869   -0.78    0.03  1.0000
   0   5  21  116264   48755                                                      108440   -0.78    0.03  1.0000
   0  -5 -21   52146   69026                                                       46723   -0.78   -0.03  1.0000
   0   5  21  114309   97071                                                      106552   -0.78    0.03  1.0000
   0   5  21  107691   56394                                                      100165   -0.78    0.03  1.0000
   0  -5 -22  395440  103573                                                      379067    0.77    0.06  1.0000
   0   5  22  469626  166074                                                      452130    0.77   -0.06  1.0000
   0   5  22  372526  172124                                                      356961    0.77   -0.06  1.0000
   0   5  22  354667  109954                                                      339483    0.77   -0.06  1.0000
   0  -5 -22  464505  153227                                                      446745    0.77    0.06  1.0000
   0  -5 -23     240  118534                                                     -102727   -0.91   -0.06  1.0000
   0   5  23  201495  127962                                                      188056   -0.91    0.06  1.0000
   0  -5 -23   31349   70266                                                       26105   -0.91   -0.06  1.0000
   0   5  23  270134  102462                                                      254539   -0.91    0.06  1.0000
   0   5  23  227321  121207                                                      213033   -0.91    0.06  1.0000
   0  -5 -24  351294  145581                                                      336793    0.72    0.06  1.0000
   0   5  24  757733  259758                                                      736741    0.72   -0.06  1.0000
   0   5  24  706504  224909                                                      686240    0.72   -0.06  1.0000
   0   5  24  489666  134247                                                      472819    0.72   -0.06  1.0000
   0  -5 -24  560503  169235                                                      542146    0.72    0.06  1.0000
   0   5  25  380616  186045                                                      385975   -0.26    0.04  1.0000
   0   5  25  586749  250308                                                      593400   -0.26    0.04  1.0000
   0  -5 -25  258916  161193                                                      263491   -0.26   -0.04  1.0000
   0   5  25  348517  126574                                                      353646   -0.26    0.04  1.0000
   0  -5 -25  137295   94369                                                      140632   -0.26   -0.04  1.0000
   0   5  26 1131421  301631                                                     1131619    0.01   -0.01  1.0000
   0  -5 -26 1487685  296765                                                     1488026    0.01    0.01  1.0000
   0   5  26 1998452  385605                                                     1998716    0.01   -0.01  1.0000
   0  -5 -26 1224750  283735                                                     1225060    0.01    0.01  1.0000
   0   5  27  115125  122271                                                      118522   -0.31   -0.02  1.0000
   0   5  27      28  189726                                                     -236098   -0.31   -0.02  1.0000
   0  -5 -27   14749   75761                                                       15921   -0.31    0.02  1.0000
   0  -5 -27      28  103348                                                     -126212   -0.31    0.02  1.0000
   0   5  28  351144  208096                                                      336554    0.73    0.02  1.0000
   0  -5 -28  252351  123735                                                      240066    0.73   -0.02  1.0000
   0  -5 -28  235352  148117                                                      223494    0.73   -0.02  1.0000
   0   5  28  126663  147139                                                      117962    0.73    0.02  1.0000
   0  -5 -29     227  115384                                                      -61041   -0.89   -0.01  1.0000
   0  -5 -29  114029   97294                                                      104450   -0.89   -0.01  1.0000
   0  -5 -30  111364  115088                                                      125666    1.27    0.04  1.0000
   0  -5 -31    1329  176605                                                     -350840   -2.14   -0.05  1.0000
   0  -6  31  589182  192454                                                      655238   -2.48    0.00  1.0000
   0  -6  30 1133425  264705                                                     1184752    1.41    0.01  1.0000
   0  -6  29      13  103659                                                     -107378   -0.21   -0.02  1.0000
   0  -6  29      13  103476                                                     -108672   -0.21   -0.02  1.0000
   0  -6  28  440827  179406                                                      441772   -0.04    0.00  1.0000
   0  -6  28  436826  201493                                                      437766   -0.04    0.00  1.0000
   0   6 -27      34  112508                                                      -78771    0.34   -0.01  1.0000
   0  -6  27      34  138372                                                     -153389    0.34    0.01  1.0000
   0  -6  27      34   89370                                                      -43916    0.34    0.01  1.0000
   0  -6  26     574  125505                                                     -110531   -1.41    0.01  1.0000
   0   6 -26  233034  126189                                                      210620   -1.41   -0.01  1.0000
   0  -6  26     574   99196                                                      -30220   -1.41    0.01  1.0000
   0  -6  25  782770  195846                                                      840618    1.90   -0.02  1.0000
   0   6 -25  821068  214137                                                      880414    1.90    0.02  1.0000
   0  -6  25 1072076  247571                                                     1139602    1.90   -0.02  1.0000
   0   6 -24  548015  170532                                                      575527   -1.08   -0.01  1.0000
   0  -6  24  624783  188103                                                      654087   -1.08    0.01  1.0000
   0  -6  24  410128  150121                                                      433933   -1.08    0.01  1.0000
   0  -6  23  634072  193174                                                      628878    0.20   -0.03  1.0000
   0  -6  23  611087  182731                                                      605988    0.20   -0.03  1.0000
   0   6 -23  539268  166996                                                      534195    0.20    0.03  1.0000
   0   6 -22  799569  184295                                                      794095   -0.18   -0.05  1.0000
   0  -6  22  765080  191133                                                      760113   -0.18    0.05  1.0000
   0  -6  22  799889  183394                                                      794809   -0.18    0.05  1.0000
   0  -6  21  651047  178907                                                      637146    0.51   -0.04  1.0000
   0  -6  21  791256  171292                                                      775923    0.51   -0.04  1.0000
   0   6 -21  692287  182601                                                      677869    0.51    0.04  1.0000
   0  -6  20  473109  134439                                                      459520   -0.59    0.03  1.0000
   0  -6  20  505964  151306                                                      491908   -0.59    0.03  1.0000
   0   6 -20  668060  170629                                                      651833   -0.59   -0.03  1.0000
   0  -6  19 1028702  195247                                                     1038139    0.28   -0.04  1.0000
   0   6 -19 1191757  214466                                                     1202147    0.28    0.04  1.0000
   0  -6  19 1381471  237755                                                     1392404    0.28   -0.04  1.0000
   0  -6  18 5726530  446033                                                     5733623   -0.09    0.04  1.0000
   0   6 -18 5955902  236904                                                     5963806   -0.09   -0.04  1.0000
   0  -6  18 5617944  446398                                                     5624969   -0.09    0.04  1.0000
   0   6 -18 6271021  466920                                                     6279132   -0.09   -0.04  1.0000
   0  -6  17   46885   65174                                                       42997    0.76   -0.02  1.0000
   0   6 -17   58267   24389                                                       54207    0.76    0.02  1.0000
   0   6 -17     166   59716                                                      -31672    0.76    0.02  1.0000
   0  -6  17    1333   53509                                                         694    0.76   -0.02  1.0000
   0   6 -16 3551794  202814                                                     3443226   -1.71   -0.03  1.0000
   0  -6  16 2825213  299335                                                     2728857   -1.71    0.03  1.0000
   0  -6  16 3149706  298708                                                     3047921   -1.71    0.03  1.0000
   0   6 -16 3153041  361781                                                     3050797   -1.71   -0.03  1.0000
   0   6 -16 3402008  315421                                                     3295772   -1.71   -0.03  1.0000
   0   6 -15  244301   99453                                                      270510    1.59    0.03  1.0000
   0   6 -15  310368  102295                                                      339832    1.59    0.03  1.0000
   0   6 -15  155660   48584                                                      176704    1.59    0.03  1.0000
   0  -6  15  215688   86647                                                      240622    1.59   -0.03  1.0000
   0  -6  15   89070   71593                                                      105321    1.59   -0.03  1.0000
   0  -6  14 1106914  171478                                                     1130856   -0.67   -0.02  1.0000
   0  -6  14 1285276  197144                                                     1311065   -0.67   -0.02  1.0000
   0   6 -14 1154791  184679                                                     1179205   -0.67    0.02  1.0000
   0   6 -14 1237622  129421                                                     1262892   -0.67    0.02  1.0000
   0   6 -14 1181862  217626                                                     1206560   -0.67    0.02  1.0000
   0  -6  13  614636  124585                                                      607374    0.27    0.04  1.0000
   0   6 -13  705406  140279                                                      698042    0.27   -0.04  1.0000
   0   6 -13  881551  188721                                                      873317    0.27   -0.04  1.0000
   0  -6  13  571566  129140                                                      564564    0.27    0.04  1.0000
   0  -6  13  821005  141445                                                      812608    0.27    0.04  1.0000
   0   6 -13  673877  101411                                                      666680    0.27   -0.04  1.0000
   0   6 -12 7777618  514738                                                     7762560   -0.16   -0.01  1.0000
   0  -6  12 7463546  434735                                                     7448867   -0.16    0.01  1.0000
   0   6 -12 8057895  345948                                                     8042569   -0.16   -0.01  1.0000
   0  -6  12 7657603  406909                                                     7642734   -0.16    0.01  1.0000
   0   6 -12 7088609  425873                                                     7074234   -0.16   -0.01  1.0000
   0  -6  12 7327139  401301                                                     7312595   -0.16    0.01  1.0000
   0   6 -11  701843  100041                                                      687694   -0.53    0.02  1.0000
   0   6 -11  459346  126917                                                      447913   -0.53    0.02  1.0000
   0   6 -11  730507  131081                                                      716071   -0.53    0.02  1.0000
   0  -6  11  589789  104355                                                      576547   -0.53   -0.02  1.0000
   0   6 -11  558685  110611                                                      546069   -0.53    0.02  1.0000
   0  -6  11  720374  120577                                                      705731   -0.53   -0.02  1.0000
   0  -6  11  785460  146882                                                      770167   -0.53   -0.02  1.0000
   0  -6  10 8437865  436647                                                     8332459    1.08   -0.05  1.0000
   0   6 -10 8489293  495779                                                     8382452    1.08    0.05  1.0000
   0  -6  10 8640853  402400                                                     8534182    1.08   -0.05  1.0000
   0   6 -10 8327685  403062                                                     8221868    1.08    0.05  1.0000
   0   6 -10 9008909  429207                                                     8898836    1.08    0.05  1.0000
   0  -6  10 9033562  400102                                                     8924488    1.08   -0.05  1.0000
   0  -6   9  132606   52359                                                      128797   -0.30    0.09  1.0000
   0   6  -9   48543   33232                                                       46351   -0.30   -0.09  1.0000
   0   6  -9  141344   62315                                                      137589   -0.30   -0.09  1.0000
   0  -6   9      29   55544                                                        -511   -0.30    0.09  1.0000
   0   6  -9   35737   45747                                                       33859   -0.30   -0.09  1.0000
   0  -6   9   46089   43046                                                       43854   -0.30    0.09  1.0000
   0  -6   8 2225805  205301                                                     2139283   -1.73   -0.06  1.0000
   0  -6   8 2268102  191661                                                     2180755   -1.73   -0.06  1.0000
   0   6  -8 2179937  195917                                                     2094926   -1.73    0.06  1.0000
   0  -6   8 2333026  211088                                                     2244425   -1.73   -0.06  1.0000
   0   6  -8 2059146  226134                                                     1976547   -1.73    0.06  1.0000
   0  -6   8 2250572  178595                                                     2163566   -1.73   -0.06  1.0000
   0   6  -8 2094892  202661                                                     2011572   -1.73    0.06  1.0000
   0  -6   7 3674594  243744                                                     3452687    3.46    0.01  1.0000
   0  -6   7 3387541  210442                                                     3174615    3.46    0.01  1.0000
   0  -6   7 3156937  235932                                                     2951506    3.46    0.01  1.0000
   0   6  -7 3628014  242100                                                     3407576    3.46   -0.01  1.0000
   0  -6   7 3816810  246830                                                     3590583    3.46    0.01  1.0000
   0  -6   7 3716032  236306                                                     3492857    3.46    0.01  1.0000
   0   6  -7 3571183  248976                                                     3352505    3.46   -0.01  1.0000
   0  -6   6  164836   44880                                                      131205   -2.98    0.01  1.0000
   0   6  -6  204790   50925                                                      167014   -2.98   -0.01  1.0000
   0  -6   6  160001   50606                                                      126886   -2.98    0.01  1.0000
   0   6  -6  136435   39687                                                      105840   -2.98   -0.01  1.0000
   0  -6   6  104246   50725                                                       77764   -2.98    0.01  1.0000
   0   6  -6  225580   65683                                                      185870   -2.98   -0.01  1.0000
   0  -6   6  138012   44065                                                      107348   -2.98    0.01  1.0000
   0   6  -6  101264   39475                                                       75089   -2.98   -0.01  1.0000
   0  -6   6  106670   38932                                                       79868   -2.98    0.01  1.0000
   0  -6   5 1906432  165742                                                     1876973    0.64   -0.03  1.0000
   0   6  -5 1849530  167823                                                     1820073    0.64    0.03  1.0000
   0  -6   5 1776610  136485                                                     1748175    0.64   -0.03  1.0000
   0   6  -5 1888840  169507                                                     1859069    0.64    0.03  1.0000
   0  -6   5 2038408  178987                                                     2007942    0.64   -0.03  1.0000
   0   6  -5 1934890  176194                                                     1904757    0.64    0.03  1.0000
   0  -6   5 1924702  165337                                                     1895101    0.64   -0.03  1.0000
   0   6  -5 2086708  150342                                                     2055411    0.64    0.03  1.0000
   0   6  -4 1989619  138492                                                     1964573    0.53   -0.06  1.0000
   0  -6   4 2033578  176655                                                     2007590    0.53    0.06  1.0000
   0   6  -4 2091393  175692                                                     2065713    0.53   -0.06  1.0000
   0   6  -4 1992877  170516                                                     1967811    0.53   -0.06  1.0000
   0  -6   4 2034178  168528                                                     2008187    0.53    0.06  1.0000
   0  -6   4 1937784  136119                                                     1912418    0.53    0.06  1.0000
   0   6  -4 2188960  178782                                                     2162685    0.53   -0.06  1.0000
   0  -6   4 2155712  172966                                                     2128952    0.53    0.06  1.0000
   0  -6   3 7150320  321490                                                     7158870    0.10   -0.05  1.0000
   0  -6   3 7367223  313702                                                     7375903    0.10   -0.05  1.0000
   0   6  -3 7335347  320729                                                     7345272    0.10    0.05  1.0000
   0   6  -3 7090060  297311                                                     7099817    0.10    0.05  1.0000
   0   6  -3 7285926  247911                                                     7295817    0.10    0.05  1.0000
   0  -6   3 7830391  303496                                                     7839340    0.10   -0.05  1.0000
   0   6  -3 7707288  320964                                                     7717459    0.10    0.05  1.0000
   0  -6   2  502928   85404                                                      484754    0.76    0.01  1.0000
   0   6  -2  484347   76155                                                      466564    0.76   -0.01  1.0000
   0   6  -2  464410   76479                                                      447001    0.76   -0.01  1.0000
   0  -6   2  440145   77006                                                      423154    0.76    0.01  1.0000
   0   6  -2  409469   75721                                                      393132    0.76   -0.01  1.0000
   0  -6   2  499438   72391                                                      481328    0.76    0.01  1.0000
   0   6  -2  447534   58750                                                      430446    0.76   -0.01  1.0000
   0   6  -1    5181   22424                                                       16626   -3.40   -0.01  1.0000
   0   6  -1   25747   33442                                                       47359   -3.40   -0.01  1.0000
   0  -6   1   25443   29591                                                       46930   -3.40    0.01  1.0000
   0  -6   1   41475   38428                                                       68025   -3.40    0.01  1.0000
   0  -6   1   39727   45755                                                       65780   -3.40    0.01  1.0000
   0   6  -1   33666   50788                                                       57920   -3.40   -0.01  1.0000
   0   6   0  284886   56760                                                      233383    3.06   -0.01  1.0000
   0  -6   0  328202   54810                                                      272630    3.06    0.01  1.0000
   0   6   0  327851   50653                                                      272424    3.06   -0.01  1.0000
   0  -6   0  347216   51323                                                      289988    3.06    0.01  1.0000
   0   6   0  438189   65638                                                      373732    3.06   -0.01  1.0000
   0  -6   0  395222   74181                                                      334002    3.06    0.01  1.0000
   0  -6  -1  729661   80602                                                      693599    1.31   -0.06  1.0000
   0   6   1  884272   92078                                                      843601    1.31    0.06  1.0000
   0  -6  -1  878226  101095                                                      838622    1.31   -0.06  1.0000
   0   6   1  832268   84052                                                      792825    1.31    0.06  1.0000
   0  -6  -1  929786  125621                                                      889024    1.31   -0.06  1.0000
   0   6   1  726641  104514                                                      689815    1.31    0.06  1.0000
   0   6   230557458  513062                                                    29700746   -4.59   -0.07  1.0000
   0   6   230875886  717930                                                    30014694   -4.59   -0.07  1.0000
   0  -6  -228757110  619706                                                    27927908   -4.59    0.07  1.0000
   0   6   230216182  472421                                                    29364296   -4.59   -0.07  1.0000
   0  -6  -229668154  532605                                                    28825822   -4.59    0.07  1.0000
   0   6   3 4556561  202280                                                     4887687    4.48    0.02  1.0000
   0  -6  -3 4507216  253576                                                     4836589    4.48   -0.02  1.0000
   0  -6  -3 4488046  212763                                                     4816729    4.48   -0.02  1.0000
   0   6   3 4499324  293575                                                     4828400    4.48    0.02  1.0000
   0  -6  -3 4364996  312111                                                     4689222    4.48   -0.02  1.0000
   0   6   3 4343649  296609                                                     4667083    4.48    0.02  1.0000
   0   6   3 4393327  191224                                                     4718573    4.48    0.02  1.0000
   0   6   4 6096378  226619                                                     6450419   -4.18    0.03  1.0000
   0  -6  -4 6145731  317196                                                     6501713   -4.18   -0.03  1.0000
   0  -6  -4 5303153  340842                                                     5634185   -4.18   -0.03  1.0000
   0  -6  -4 5504924  275626                                                     5842101   -4.18   -0.03  1.0000
   0   6   4 5727311  217990                                                     6070620   -4.18    0.03  1.0000
   0   6   4 6065154  347062                                                     6418300   -4.18    0.03  1.0000
   0   6   4 5876054  350263                                                     6223729   -4.18    0.03  1.0000
   0   6   5  279372   69244                                                      194188    5.32   -0.05  1.0000
   0   6   5  264713   56585                                                      181986    5.32   -0.05  1.0000
   0  -6  -5  213768   45208                                                      140534    5.32    0.05  1.0000
   0  -6  -5  279070   53520                                                      194383    5.32    0.05  1.0000
   0  -6  -5  355384   70551                                                      258909    5.32    0.05  1.0000
   0   6   5  254313   44837                                                      173372    5.32   -0.05  1.0000
   0   6   5  208579   48140                                                      135962    5.32   -0.05  1.0000
   0  -6  -6    7807   34363                                                       30524   -6.02   -0.06  1.0000
   0   6   6    3953   29277                                                       20604   -6.02    0.06  1.0000
   0  -6  -6   10488   36124                                                        -212   -6.02   -0.06  1.0000
   0   6   6   10488   61722                                                      -59147   -6.02    0.06  1.0000
   0   6   6    1717   22441                                                       11537   -6.02    0.06  1.0000
   0  -6  -6   10488   47642                                                       -9814   -6.02   -0.06  1.0000
   0   6   7 1387956  203002                                                     1612617    5.49   -0.08  1.0000
   0  -6  -7 1400907  194268                                                     1627693    5.49    0.08  1.0000
   0   6   7 1444928  113387                                                     1673988    5.49   -0.08  1.0000
   0   6   7 1604938  197954                                                     1845910    5.49   -0.08  1.0000
   0  -6  -7 1467396  173643                                                     1699307    5.49    0.08  1.0000
   0   6   7 1561375  171279                                                     1799166    5.49   -0.08  1.0000
   0  -6  -7 1427508  151851                                                     1656358    5.49    0.08  1.0000
   0   6   8  424033  126036                                                      534357   -4.71    0.06  1.0000
   0  -6  -8  361712  116721                                                      463841   -4.71   -0.06  1.0000
   0   6   8  416495  107035                                                      525891   -4.71    0.06  1.0000
   0  -6  -8  446683  104888                                                      559479   -4.71   -0.06  1.0000
   0   6   8  463831  104729                                                      578926   -4.71    0.06  1.0000
   0  -6  -8  348852  109540                                                      449262   -4.71   -0.06  1.0000
   0  -6  -8  413017   93892                                                      521719   -4.71   -0.06  1.0000
   0   6   9 3237662  296487                                                     2996118    4.12   -0.01  1.0000
   0   6   9 3570865  248320                                                     3316972    4.12   -0.01  1.0000
   0   6   9 3747434  255897                                                     3487232    4.12   -0.01  1.0000
   0  -6  -9 3288216  228879                                                     3044624    4.12    0.01  1.0000
   0  -6  -9 3331033  281751                                                     3085831    4.12    0.01  1.0000
   0  -6  -9 3900282  272832                                                     3634588    4.12    0.01  1.0000
   0  -6  -9 3494997  299843                                                     3243724    4.12    0.01  1.0000
   0   6  10 6783519  455888                                                     6467559   -3.62   -0.03  1.0000
   0  -6 -10 6284946  336966                                                     5981327   -3.62    0.03  1.0000
   0   6  10 6703168  346784                                                     6389107   -3.62   -0.03  1.0000
   0  -6 -10 6538354  421276                                                     6228601   -3.62    0.03  1.0000
   0  -6 -10 7105403  424228                                                     6782338   -3.62    0.03  1.0000
   0   6  11 3996825  290489                                                     4196817    2.91    0.05  1.0000
   0  -6 -11 3819166  292938                                                     4014084    2.91   -0.05  1.0000
   0  -6 -11 3790243  355025                                                     3984431    2.91   -0.05  1.0000
   0   6  11 3619252  369028                                                     3809681    2.91    0.05  1.0000
   0  -6 -11 4266732  354186                                                     4472619    2.91   -0.05  1.0000
   0   6  12 1529331  182168                                                     1594674   -1.54   -0.04  1.0000
   0  -6 -12 1911445  255055                                                     1984169   -1.54    0.04  1.0000
   0   6  12 1645658  131406                                                     1713415   -1.54   -0.04  1.0000
   0  -6 -12 1545935  222986                                                     1611404   -1.54    0.04  1.0000
   0  -6 -12 1552815  186830                                                     1618428   -1.54    0.04  1.0000
   0   6  12 1448435  232718                                                     1512044   -1.54   -0.04  1.0000
   0  -6 -13 1031861  194579                                                     1032367   -0.01   -0.01  1.0000
   0   6  13  804812  138071                                                      805262   -0.01    0.01  1.0000
   0  -6 -13  852944  149597                                                      853404   -0.01   -0.01  1.0000
   0   6  13 1013421  188200                                                     1013926   -0.01    0.01  1.0000
   0   6  13  815219   94688                                                      815672   -0.01    0.01  1.0000
   0  -6 -13  894167  165453                                                      894638   -0.01   -0.01  1.0000
   0  -6 -14   12670   67790                                                       10531    0.66   -0.03  1.0000
   0  -6 -14   52346   65163                                                       47927    0.66   -0.03  1.0000
   0   6  14   62719   58118                                                       57650    0.66    0.03  1.0000
   0   6  14  136029   43937                                                      128524    0.66    0.03  1.0000
   0  -6 -14   75479   52678                                                       70160    0.66   -0.03  1.0000
   0   6  14  225294   72003                                                      215610    0.66    0.03  1.0000
   0   6  15   19991   60021                                                       16115   -0.88   -0.02  1.0000
   0  -6 -15   34296   76037                                                       29224   -0.88    0.02  1.0000
   0  -6 -15   41553   45766                                                       35952   -0.88    0.02  1.0000
   0   6  15  102029   59371                                                       93033   -0.88   -0.02  1.0000
   0  -6 -15     226   89374                                                       -7960   -0.88    0.02  1.0000
   0   6  15   98332   49174                                                       89504   -0.88   -0.02  1.0000
   0   6  16   71722   75758                                                       85379    1.72   -0.02  1.0000
   0  -6 -16     856   90597                                                     -102061    1.72    0.02  1.0000
   0   6  16   55123   43104                                                       67137    1.72   -0.02  1.0000
   0   6  16  124454   51211                                                      142338    1.72   -0.02  1.0000
   0  -6 -16     856   59959                                                      -75753    1.72    0.02  1.0000
   0   6  16   89582   49995                                                      104806    1.72   -0.02  1.0000
   0  -6 -17  487301  136644                                                      543799   -2.36   -0.04  1.0000
   0   6  17  552343  116025                                                      611991   -2.36    0.04  1.0000
   0   6  17  374516  107415                                                      423887   -2.36    0.04  1.0000
   0  -6 -17  568763  162334                                                      629682   -2.36   -0.04  1.0000
   0   6  17  550975  177235                                                      610551   -2.36    0.04  1.0000
   0   6  17  416310   86205                                                      468284   -2.36    0.04  1.0000
   0   6  18   16656   45868                                                       24295    1.66   -0.02  1.0000
   0   6  18     793  112352                                                      -55159    1.66   -0.02  1.0000
   0   6  18    5918   34374                                                       10728    1.66   -0.02  1.0000
   0  -6 -18     793   89900                                                      -33982    1.66    0.02  1.0000
   0  -6 -18     793   97879                                                      -76483    1.66    0.02  1.0000
   0   6  19      81  138111                                                     -123603   -0.53    0.01  1.0000
   0  -6 -19   65809   55778                                                       70450   -0.53   -0.01  1.0000
   0   6  19  166101   53893                                                      173388   -0.53    0.01  1.0000
   0   6  19   61543   57357                                                       66008   -0.53    0.01  1.0000
   0   6  19  102212  117451                                                      107944   -0.53    0.01  1.0000
   0  -6 -19   60572   86202                                                       65027   -0.53   -0.01  1.0000
   0   6  20  485247  170431                                                      476554    0.37   -0.01  1.0000
   0   6  20  492859  170402                                                      484098    0.37   -0.01  1.0000
   0  -6 -20  665092  194547                                                      654882    0.37    0.01  1.0000
   0  -6 -20  531718  153520                                                      522594    0.37    0.01  1.0000
   0   6  20  698817  156990                                                      688378    0.37   -0.01  1.0000
   0  -6 -21 2558087  334035                                                     2515629   -0.79   -0.01  1.0000
   0   6  21 2871078  311446                                                     2826230   -0.79    0.01  1.0000
   0   6  21 2953923  421139                                                     2908430   -0.79    0.01  1.0000
   0   6  21 2218564  362682                                                     2179160   -0.79    0.01  1.0000
   0  -6 -21 2312491  349230                                                     2272131   -0.79   -0.01  1.0000
   0  -6 -22 1062265  239054                                                     1038325    0.69    0.01  1.0000
   0   6  22  967569  185338                                                      944821    0.69   -0.01  1.0000
   0  -6 -22  794654  188611                                                      773967    0.69    0.01  1.0000
   0   6  22 1086268  267074                                                     1062157    0.69   -0.01  1.0000
   0   6  22  857865  237274                                                      836453    0.69   -0.01  1.0000
   0  -6 -23  564563  177062                                                      564964   -0.01   -0.02  1.0000
   0   6  23  644247  212502                                                      644485   -0.01    0.02  1.0000
   0  -6 -23  792389  216472                                                      792864   -0.01   -0.02  1.0000
   0   6  23  719517  175964                                                      719769   -0.01    0.02  1.0000
   0   6  23  846127  264428                                                      846400   -0.01    0.02  1.0000
   0  -6 -24  571740  206379                                                      560332   -0.45    0.02  1.0000
   0   6  24  458519  189579                                                      448210   -0.45   -0.02  1.0000
   0  -6 -24  658351  188875                                                      646105   -0.45    0.02  1.0000
   0   6  24  518029  195746                                                      507067   -0.45   -0.02  1.0000
   0   6  24  834631  188495                                                      820702   -0.45   -0.02  1.0000
   0   6  25   33473  101513                                                       34804    0.22   -0.02  1.0000
   0   6  25  179033  158745                                                      182095    0.22   -0.02  1.0000
   0  -6 -25   23696  106343                                                       24862    0.22    0.02  1.0000
   0  -6 -25      14  113869                                                     -139589    0.22    0.02  1.0000
   0   6  26      16   88122                                                      -13903    0.23    0.06  1.0000
   0  -6 -26  132346   77842                                                      133245    0.23   -0.06  1.0000
   0   6  26      16  130784                                                      -51970    0.23    0.06  1.0000
   0  -6 -26      16  122474                                                     -127485    0.23   -0.06  1.0000
   0  -6 -27  122434  120811                                                      123689   -0.12    0.07  1.0000
   0   6  27  298899  178799                                                      301280   -0.12   -0.07  1.0000
   0  -6 -27  159562  120801                                                      160995   -0.12    0.07  1.0000
   0  -6 -28      27  134402                                                      -32731   -0.30   -0.04  1.0000
   0  -6 -28  153900  132667                                                      157920   -0.30   -0.04  1.0000
   0   6  28     596  109847                                                         839   -0.30    0.04  1.0000
   0  -6 -29  608660  223507                                                      609385    0.03    0.00  1.0000
   0  -6 -29 1228159  296216                                                     1229188    0.03    0.00  1.0000
   0  -6 -30     277  116539                                                     -129988    0.98    0.04  1.0000
   0  -7  30  177283  132970                                                      191829    1.09    0.02  1.0000
   0  -7  29     328  127455                                                     -144476   -1.07    0.00  1.0000
   0  -7  29   87125  142985                                                       97888   -1.07    0.00  1.0000
   0  -7  28      48   96804                                                      -49960    0.41   -0.01  1.0000
   0  -7  28      48  123860                                                     -168655    0.41   -0.01  1.0000
   0  -7  27  428941  151767                                                      444373    0.70   -0.01  1.0000
   0  -7  27  638791  200102                                                      657594    0.70   -0.01  1.0000
   0  -7  26   97825   99248                                                      107647   -0.90    0.01  1.0000
   0   7 -26  296575  134429                                                      313510   -0.90   -0.01  1.0000
   0  -7  26  475761  185285                                                      497139   -0.90    0.01  1.0000
   0  -7  25  151848  118404                                                      148215    0.28   -0.01  1.0000
   0   7 -25   54830   80814                                                       52647    0.28    0.01  1.0000
   0  -7  25      22  112382                                                     -163245    0.28   -0.01  1.0000
   0  -7  24  276629  144467                                                      275643   -0.06    0.03  1.0000
   0  -7  24  218470   99322                                                      217593   -0.06    0.03  1.0000
   0   7 -24  127451   72229                                                      126747   -0.06   -0.03  1.0000
   0  -7  23 2016435  314837                                                     2005447    0.23   -0.03  1.0000
   0  -7  23 2163511  313774                                                     2152129    0.23   -0.03  1.0000
   0   7 -23 2096366  317730                                                     2084790    0.23    0.03  1.0000
   0  -7  22  737934  208412                                                      736934   -0.04    0.01  1.0000
   0   7 -22  916455  198388                                                      915266   -0.04   -0.01  1.0000
   0  -7  22  661298  176079                                                      660351   -0.04    0.01  1.0000
   0  -7  21 3154156  359706                                                     3128653   -0.42    0.00  1.0000
   0  -7  21 2747382  342553                                                     2723584   -0.42    0.00  1.0000
   0   7 -21 2871672  343789                                                     2847362   -0.42    0.00  1.0000
   0  -7  20 1363475  232532                                                     1339946    0.60    0.01  1.0000
   0   7 -20 1556886  250888                                                     1531885    0.60   -0.01  1.0000
   0  -7  20 1378673  240504                                                     1355012    0.60    0.01  1.0000
   0  -7  19 1105943  201943                                                     1112385   -0.18   -0.01  1.0000
   0  -7  19 1082932  209013                                                     1089306   -0.18   -0.01  1.0000
   0   7 -19  757083  157980                                                      762375   -0.18    0.01  1.0000
   0   7 -18   38547   48810                                                       44092   -0.82   -0.02  1.0000
   0  -7  18  131839   68727                                                      141841   -0.82    0.02  1.0000
   0   7 -18   27718   73597                                                       32448   -0.82   -0.02  1.0000
   0  -7  18     192   66750                                                      -43985   -0.82    0.02  1.0000
   0  -7  17  403477  126056                                                      439059    1.67   -0.05  1.0000
   0   7 -17  571937  146540                                                      614822    1.67    0.05  1.0000
   0   7 -17  308102  126569                                                      339775    1.67    0.05  1.0000
   0   7 -17  552531   97230                                                      594695    1.67    0.05  1.0000
   0  -7  17  443242  135185                                                      480502    1.67   -0.05  1.0000
   0  -7  16 2173378  251218                                                     2083205   -1.83    0.05  1.0000
   0   7 -16 2297122  314994                                                     2203893   -1.83   -0.05  1.0000
   0   7 -16 2205331  181467                                                     2114003   -1.83   -0.05  1.0000
   0   7 -16 2371251  271601                                                     2276514   -1.83   -0.05  1.0000
   0  -7  16 2105195  264933                                                     2016463   -1.83    0.05  1.0000
   0   7 -15 8342400  582841                                                     8142799    2.06   -0.01  1.0000
   0   7 -15 7997758  484864                                                     7802349    2.06   -0.01  1.0000
   0  -7  15 8856143  482696                                                     8650300    2.06    0.01  1.0000
   0   7 -15 8491047  368994                                                     8289667    2.06   -0.01  1.0000
   0  -7  15 8559400  517385                                                     8357055    2.06    0.01  1.0000
   0  -7  14  279641  108497                                                      233378   -2.69   -0.01  1.0000
   0   7 -14  307837  120633                                                      259193   -2.69    0.01  1.0000
   0   7 -14  241134   78967                                                      198322   -2.69    0.01  1.0000
   0  -7  14  353331   99033                                                      301070   -2.69   -0.01  1.0000
   0   7 -14  364332   79574                                                      311229   -2.69    0.01  1.0000
   0   7 -13 5075628  302395                                                     5256548    2.34    0.04  1.0000
   0  -7  13 4717885  337314                                                     4891933    2.34   -0.04  1.0000
   0   7 -13 4578131  363384                                                     4750036    2.34    0.04  1.0000
   0   7 -13 4266492  404905                                                     4432498    2.34    0.04  1.0000
   0  -7  13 4370464  364220                                                     4538041    2.34   -0.04  1.0000
   0   7 -12     153   85347                                                      -58129   -0.73   -0.02  1.0000
   0  -7  12   29770   48545                                                       34103   -0.73    0.02  1.0000
   0  -7  12     153   44484                                                      -44701   -0.73    0.02  1.0000
   0  -7  12   35269   56555                                                       39973   -0.73    0.02  1.0000
   0   7 -12     153   69618                                                      -45162   -0.73   -0.02  1.0000
   0   7 -12   61522   29315                                                       67755   -0.73   -0.02  1.0000
   0   7 -11 4707079  294771                                                     4716900    0.14   -0.03  1.0000
   0   7 -11 4367899  379099                                                     4377359    0.14   -0.03  1.0000
   0   7 -11 4630781  323575                                                     4640521    0.14   -0.03  1.0000
   0   7 -11 4436035  320422                                                     4445568    0.14   -0.03  1.0000
   0  -7  11 4355658  300892                                                     4365423    0.14    0.03  1.0000
   0  -7  11 4431472  305533                                                     4441323    0.14    0.03  1.0000
   0  -7  11 4302974  334089                                                     4312681    0.14    0.03  1.0000
   0  -7  10 2413906  221892                                                     2517498   -1.95   -0.03  1.0000
   0   7 -10 2919251  251971                                                     3032620   -1.95    0.03  1.0000
   0  -7  10 2349778  246565                                                     2451998   -1.95   -0.03  1.0000
   0   7 -10 2239447  226212                                                     2338873   -1.95    0.03  1.0000
   0   7 -10 2526653  288889                                                     2632197   -1.95    0.03  1.0000
   0  -7  10 2498991  220043                                                     2604374   -1.95   -0.03  1.0000
   0   7  -9 5269687  319506                                                     4938835    4.32   -0.01  1.0000
   0  -7   9 5494186  342068                                                     5156113    4.32    0.01  1.0000
   0   7  -9 5361675  377513                                                     5027902    4.32   -0.01  1.0000
   0  -7   9 5550401  301702                                                     5210577    4.32    0.01  1.0000
   0  -7   9 5615866  316874                                                     5274012    4.32    0.01  1.0000
   0  -7   8 7655849  391645                                                     7213128   -4.81   -0.04  1.0000
   0   7  -8 7769721  380814                                                     7324687   -4.81    0.04  1.0000
   0  -7   8 8200842  343518                                                     7742407   -4.81   -0.04  1.0000
   0   7  -8 8020990  398533                                                     7568713   -4.81    0.04  1.0000
   0  -7   8 7855114  365116                                                     7406584   -4.81   -0.04  1.0000
   0   7  -7  201527   80289                                                      256558    3.40   -0.07  1.0000
   0  -7   7  146065   47261                                                      193566    3.40    0.07  1.0000
   0  -7   7  182434   74393                                                      235129    3.40    0.07  1.0000
   0  -7   7  227772   73332                                                      286261    3.40    0.07  1.0000
   0  -7   7  161762   70383                                                      211575    3.40    0.07  1.0000
   0   7  -7  180147   69073                                                      232356    3.40   -0.07  1.0000
   0  -7   6  145491   52053                                                      119850   -2.16   -0.02  1.0000
   0  -7   6  109435   51450                                                       87348   -2.16   -0.02  1.0000
   0   7  -6  143556   48069                                                      117941   -2.16    0.02  1.0000
   0   7  -6   98481   53512                                                       77467   -2.16    0.02  1.0000
   0   7  -6  166917   72529                                                      139204   -2.16    0.02  1.0000
   0  -7   6   41319   33336                                                       28192   -2.16   -0.02  1.0000
   0  -7   6  310597   93041                                                      272609   -2.16   -0.02  1.0000
   0   7  -5 6696205  330593                                                     6498807    2.26    0.04  1.0000
   0  -7   5 7329584  342474                                                     7123493    2.26   -0.04  1.0000
   0  -7   5 6444345  264673                                                     6251191    2.26   -0.04  1.0000
   0   7  -5 7017181  280500                                                     6815073    2.26    0.04  1.0000
   0  -7   5 7177181  331459                                                     6973260    2.26   -0.04  1.0000
   0   7  -5 6837529  336046                                                     6638044    2.26    0.04  1.0000
   0  -7   5 7108903  347971                                                     6905961    2.26   -0.04  1.0000
   0  -7   4 7147285  348938                                                     7349019   -2.21    0.02  1.0000
   0   7  -4 7143887  278764                                                     7345839   -2.21   -0.02  1.0000
   0   7  -4 6671801  349099                                                     6867013   -2.21   -0.02  1.0000
   0   7  -4 7033000  353356                                                     7233389   -2.21   -0.02  1.0000
   0  -7   4 7065095  333316                                                     7265674   -2.21    0.02  1.0000
   0  -7   4 6848546  347745                                                     7046048   -2.21    0.02  1.0000
   0   7  -4 6570715  331753                                                     6764454   -2.21   -0.02  1.0000
   0   7  -327932578  686071                                                    28004218    0.40   -0.04  1.0000
   0  -7   328420838  694389                                                    28494264    0.40    0.04  1.0000
   0  -7   327358582  651263                                                    27430620    0.40    0.04  1.0000
   0   7  -327917040  518939                                                    27988662    0.40   -0.04  1.0000
   0  -7   328971132  618475                                                    29045262    0.40    0.04  1.0000
   0   7  -327646196  622926                                                    27717468    0.40   -0.04  1.0000
   0   7  -329520856  670759                                                    29594498    0.40   -0.04  1.0000
   0   7  -2  458746   88513                                                      486670    1.19    0.06  1.0000
   0   7  -2  582882  104046                                                      614307    1.19    0.06  1.0000
   0  -7   2  623367   89956                                                      655741    1.19   -0.06  1.0000
   0  -7   2  635092  109492                                                      667766    1.19   -0.06  1.0000
   0   7  -2  500314   73580                                                      529458    1.19    0.06  1.0000
   0  -7   2  617736  102928                                                      649966    1.19   -0.06  1.0000
   0   7  -2  552587  112772                                                      583195    1.19    0.06  1.0000
   0   7  -115880836  527589                                                    15863193    0.13   -0.02  1.0000
   0  -7   115581523  456999                                                    15563529    0.13    0.02  1.0000
   0   7  -115824648  464256                                                    15807037    0.13   -0.02  1.0000
   0   7  -115083435  421968                                                    15066242    0.13   -0.02  1.0000
   0  -7   115784935  415109                                                    15766827    0.13    0.02  1.0000
   0  -7   115707897  519882                                                    15689832    0.13    0.02  1.0000
   0  -7   0  428469   94729                                                      491623   -2.74    0.01  1.0000
   0   7   0  522756   87981                                                      592266   -2.74   -0.01  1.0000
   0   7   0  403916   72209                                                      465277   -2.74   -0.01  1.0000
   0  -7   0  548362   81890                                                      619522   -2.74    0.01  1.0000
   0  -7   0  483804   85355                                                      550776   -2.74    0.01  1.0000
   0   7   0  468291   92066                                                      534196   -2.74   -0.01  1.0000
   0   7   1  180890   46263                                                      138829    3.28   -0.01  1.0000
   0   7   1   98761   33834                                                       68326    3.28   -0.01  1.0000
   0  -7  -1  102230   32415                                                       71138    3.28    0.01  1.0000
   0   7   1    3105   58331                                                      -28781    3.28   -0.01  1.0000
   0  -7  -1   68154   38883                                                       43232    3.28    0.01  1.0000
   0  -7  -1   83720   44537                                                       55823    3.28    0.01  1.0000
   0  -7  -211261223  360408                                                    11011147   -2.21   -0.05  1.0000
   0  -7  -210768350  410626                                                    10523839   -2.21   -0.05  1.0000
   0   7   211711697  322679                                                    11457560   -2.21    0.05  1.0000
   0   7   211993479  354665                                                    11736288   -2.21    0.05  1.0000
   0   7   211731874  476642                                                    11477518   -2.21    0.05  1.0000
   0   7   3  750376  140916                                                      808769    1.96   -0.03  1.0000
   0  -7  -3  947825  159626                                                     1013505    1.96    0.03  1.0000
   0   7   3  813069   93598                                                      873809    1.96   -0.03  1.0000
   0  -7  -3 1031699  112178                                                     1100176    1.96    0.03  1.0000
   0  -7  -3  923062  129364                                                      987892    1.96    0.03  1.0000
   0   7   3  815658  100277                                                      876492    1.96   -0.03  1.0000
   0   7   420488954  441681                                                    20876762   -2.52   -0.03  1.0000
   0  -7  -422245942  633444                                                    22649014   -2.52    0.03  1.0000
   0   7   419937904  428358                                                    20320482   -2.52   -0.03  1.0000
   0  -7  -419628402  551098                                                    20007122   -2.52    0.03  1.0000
   0   7   420110788  672051                                                    20495016   -2.52   -0.03  1.0000
   0  -7  -418727886  681084                                                    19097858   -2.52    0.03  1.0000
   0  -7  -5 1685877  189561                                                     1810739    2.79   -0.05  1.0000
   0   7   5 1498787  120602                                                     1617010    2.79    0.05  1.0000
   0  -7  -5 1188958  174134                                                     1294169    2.79   -0.05  1.0000
   0  -7  -5 1448712  155979                                                     1564620    2.79   -0.05  1.0000
   0   7   5 1674348  206418                                                     1799175    2.79    0.05  1.0000
   0   7   5 1319157  115797                                                     1430207    2.79    0.05  1.0000
   0   7   6 6167690  232669                                                     5920397   -2.96   -0.03  1.0000
   0  -7  -6 6092730  299913                                                     5847384   -2.96    0.03  1.0000
   0   7   6 6356198  333941                                                     6105116   -2.96   -0.03  1.0000
   0  -7  -6 5716916  366904                                                     5479335   -2.96    0.03  1.0000
   0   7   6 6032560  378348                                                     5788019   -2.96   -0.03  1.0000
   0  -7  -6 5969854  342169                                                     5727019   -2.96    0.03  1.0000
   0   7   7  324601   63343                                                      392017    3.32    0.04  1.0000
   0  -7  -7  275858   80252                                                      338201    3.32   -0.04  1.0000
   0   7   7  385616  102806                                                      458810    3.32    0.04  1.0000
   0  -7  -7  263144   90033                                                      324107    3.32   -0.04  1.0000
   0  -7  -8  940645  151659                                                      828668   -3.52    0.07  1.0000
   0   7   8  924050   84383                                                      812739   -3.52   -0.07  1.0000
   0  -7  -8  930456  122525                                                      819107   -3.52    0.07  1.0000
   0   7   8  960284  155765                                                      846742   -3.52   -0.07  1.0000
   0   7   8  967666  135632                                                      853675   -3.52   -0.07  1.0000
   0   7   9 4909415  384020                                                     4656781    3.42    0.06  1.0000
   0  -7  -9 5271947  378956                                                     5011270    3.42   -0.06  1.0000
   0  -7  -9 4714543  283907                                                     4468207    3.42   -0.06  1.0000
   0   7   9 5221379  213448                                                     4960739    3.42    0.06  1.0000
   0   7  10  210582  105331                                                      255073   -2.74   -0.03  1.0000
   0  -7 -10  211163   80302                                                      255823   -2.74    0.03  1.0000
   0  -7 -10   72227   56021                                                       99219   -2.74    0.03  1.0000
   0  -7 -11 2303071  267460                                                     2372146    1.35    0.00  1.0000
   0  -7 -11 2049103  261481                                                     2114287    1.35    0.00  1.0000
   0   7  11 2535834  307791                                                     2608228    1.35    0.00  1.0000
   0  -7 -11 2144797  213435                                                     2211475    1.35    0.00  1.0000
   0  -7 -12   20228   46600                                                       19557   -0.22   -0.03  1.0000
   0   7  12      15   75868                                                      -15381   -0.22    0.03  1.0000
   0  -7 -12   24920   63423                                                       24176   -0.22   -0.03  1.0000
   0  -7 -12  109621   59458                                                      108063   -0.22   -0.03  1.0000
   0   7  12      15   91352                                                      -45654   -0.22    0.03  1.0000
   0  -7 -13 1516976  239480                                                     1521025    0.10    0.05  1.0000
   0  -7 -13 1246532  174006                                                     1250203    0.10    0.05  1.0000
   0   7  13 1427928  188033                                                     1431762    0.10   -0.05  1.0000
   0   7  13 1091042  216093                                                     1094394    0.10   -0.05  1.0000
   0  -7 -13 1104479  200831                                                     1107934    0.10    0.05  1.0000
   0   7  13 1140588  113686                                                     1144015    0.10   -0.05  1.0000
   0  -7 -14 5796753  459435                                                     5798301   -0.02   -0.01  1.0000
   0   7  14 5577990  493672                                                     5579369   -0.02    0.01  1.0000
   0  -7 -14 5749995  396144                                                     5751536   -0.02   -0.01  1.0000
   0   7  14 5908451  385688                                                     5909870   -0.02    0.01  1.0000
   0   7  14 5663438  255739                                                     5664827   -0.02    0.01  1.0000
   0  -7 -14 5897059  475690                                                     5898619   -0.02   -0.01  1.0000
   0  -7 -15 1176791  194531                                                     1198332   -0.58   -0.04  1.0000
   0  -7 -15 1530597  248770                                                     1555150   -0.58   -0.04  1.0000
   0   7  15 1141092  126245                                                     1162182   -0.58    0.04  1.0000
   0  -7 -15 1232931  242113                                                     1254977   -0.58   -0.04  1.0000
   0   7  15 1114570  236109                                                     1135415   -0.58    0.04  1.0000
   0   7  15 1329767  197201                                                     1352527   -0.58    0.04  1.0000
   0  -7 -16 7005369  457741                                                     7056242    0.56    0.05  1.0000
   0  -7 -16 7609772  553577                                                     7662790    0.56    0.05  1.0000
   0   7  16 7335985  450555                                                     7387046    0.56   -0.05  1.0000
   0   7  16 7244301  310042                                                     7295044    0.56   -0.05  1.0000
   0  -7 -16 7549032  562499                                                     7601840    0.56    0.05  1.0000
   0   7  16 7241407  592112                                                     7292138    0.56   -0.05  1.0000
   0  -7 -17 3056823  311636                                                     3029450    0.46   -0.02  1.0000
   0   7  17 2906711  296591                                                     2879804    0.46    0.02  1.0000
   0   7  17 3287135  402444                                                     3258517    0.46    0.02  1.0000
   0  -7 -17 3174207  378817                                                     3146312    0.46   -0.02  1.0000
   0   7  17 3442676  220727                                                     3413387    0.46    0.02  1.0000
   0  -7 -18 1265879  260446                                                     1306027   -1.05    0.00  1.0000
   0  -7 -18 1094559  207822                                                     1131913   -1.05    0.00  1.0000
   0   7  18 1122308  199558                                                     1160147   -1.05    0.00  1.0000
   0   7  18 1350292  287216                                                     1391768   -1.05    0.00  1.0000
   0   7  18 1240693  145594                                                     1280463   -1.05    0.00  1.0000
   0   7  19  764818  160413                                                      777233    0.42   -0.03  1.0000
   0  -7 -19  630830  152774                                                      642292    0.42    0.03  1.0000
   0  -7 -19  649372  190284                                                      661000    0.42    0.03  1.0000
   0   7  19  885539  243591                                                      898895    0.42   -0.03  1.0000
   0   7  20   92604   73266                                                       96226    0.35    0.06  1.0000
   0   7  20  162759  114653                                                      167550    0.35    0.06  1.0000
   0  -7 -20  167600   97291                                                      172456    0.35   -0.06  1.0000
   0  -7 -20  187084  125617                                                      192212    0.35   -0.06  1.0000
   0   7  20  119499   96445                                                      123610    0.35    0.06  1.0000
   0  -7 -21      13   91497                                                      -77571   -0.20    0.06  1.0000
   0  -7 -21      13   74220                                                      -30945   -0.20    0.06  1.0000
   0   7  21      13   69354                                                      -38651   -0.20   -0.06  1.0000
   0   7  21      13  143101                                                      -47809   -0.20   -0.06  1.0000
   0   7  21   60751   98290                                                       59141   -0.20   -0.06  1.0000
   0  -7 -22  668665  206655                                                      682696   -0.50   -0.03  1.0000
   0   7  22  626584  224266                                                      639988   -0.50    0.03  1.0000
   0   7  22  336729  134225                                                      346574   -0.50    0.03  1.0000
   0  -7 -22  530179  175096                                                      542681   -0.50   -0.03  1.0000
   0   7  22  348576  106881                                                      358592   -0.50    0.03  1.0000
   0   7  23    8419   79824                                                        6539    0.78   -0.02  1.0000
   0   7  23     175  122058                                                      -70839    0.78   -0.02  1.0000
   0   7  23     175   76341                                                      -71912    0.78   -0.02  1.0000
   0  -7 -23     175  105526                                                      -85255    0.78    0.02  1.0000
   0  -7 -23   50450   74646                                                       45569    0.78    0.02  1.0000
   0  -7 -24  129668   87738                                                      124851   -0.39   -0.05  1.0000
   0   7  24  400945  187231                                                      392836   -0.39    0.05  1.0000
   0   7  24  372194  121272                                                      364383   -0.39    0.05  1.0000
   0   7  24  248328  125015                                                      241955   -0.39    0.05  1.0000
   0  -7 -24  197435   95762                                                      191480   -0.39   -0.05  1.0000
   0  -7 -25  616907  192625                                                      614539    0.08    0.09  1.0000
   0   7  25  259633  183789                                                      258381    0.08   -0.09  1.0000
   0   7  25  493052  205994                                                      491327    0.08   -0.09  1.0000
   0  -7 -25  238142  114345                                                      236671    0.08    0.09  1.0000
   0   7  26   82224  115721                                                       78379   -0.40    0.11  1.0000
   0  -7 -26      50   95942                                                      -20498   -0.40   -0.11  1.0000
   0   7  26      50  133975                                                      -70019   -0.40    0.11  1.0000
   0  -7 -26  247655  155255                                                      240803   -0.40   -0.11  1.0000
   0  -7 -27  234268  119557                                                      249259    0.89    0.09  1.0000
   0   7  27   96877  134005                                                      106288    0.89   -0.09  1.0000
   0  -7 -27   78896  112733                                                       87693    0.89    0.09  1.0000
   0   7  27   56613  125891                                                       63855    0.89   -0.09  1.0000
   0  -7 -28  525068  191023                                                      546296   -0.85   -0.07  1.0000
   0  -7 -28  387829  179209                                                      406102   -0.85   -0.07  1.0000
   0  -7 -29   26187  101230                                                       28290    0.43    0.04  1.0000
   0  -7 -29  103249  154588                                                      107399    0.43    0.04  1.0000
   0  -8  29  267117  175997                                                      262417   -0.27    0.00  1.0000
   0  -8  29   98272  112655                                                       95429   -0.27    0.00  1.0000
   0  -8  28  829472  227245                                                      831157   -0.06    0.02  1.0000
   0  -8  28  275681  132635                                                      276653   -0.06    0.02  1.0000
   0  -8  27  456038  187152                                                      448991   -0.31   -0.01  1.0000
   0  -8  27   75325   83157                                                       72477   -0.31   -0.01  1.0000
   0   8 -26  848955  217130                                                      872767    0.76    0.00  1.0000
   0  -8  26  493454  185074                                                      511646    0.76    0.00  1.0000
   0  -8  26  863343  230689                                                      887353    0.76    0.00  1.0000
[truncated: 11,312,462 more chars]
